# Supplementary material for: Comparative Transcriptional Analysis of Clinically Relevant Heat Stress Response in Clostridium difficile Strain 630
Source: PLoS One. 2012 Jul 30;7(7):e42410. doi: 10.1371/journal.pone.0042410 (PMC3408451; doi:10.1371/journal.pone.0042410)
Supplement: Table S2 — Entire microarray expression data for heat stressed Clostridium difficile strain 630. Genes up-regulated by a fold change of 1.5 or more are highlighted in orange, and those down-regulated by a fold change of 1.5 or more are highlighted in blue. The remainder of the genes were not statistically significantly differentially expressed. (XLS) [file pone.0042410.s004.xls]

## Sheet: Table S2
Locus	Gene	Description: All genes with a statistically significant corrected p-value of at least 0.05 are highlighted in bold of which, the genes that were up-regulated by a fold change value of 1.5 or more are highlighted in orange, and those that were down-regulated by a fold change value of 1.5 or more are highlighted in blue. The differential expression of remainder of the genes was not of statistical s…	Corrected p-value	Fold Change	Regulation	Log Ratio	SEM
CD0001	dnaA	chromosomal replication initiator protein	0.232256	1.4864	Down	-0.571823	0.271623
CD0002	dnaN	DNA polymerase III, beta chain	0.128931	1.48198	Down	-0.567525	0.188471
CD0003		putative RNA-binding mediating protein	0.058432	1.30399	Down	-0.382932	0.0878727
CD0004	recF	DNA replication and repair protein	0.449808	1.18104	Down	-0.240052	0.204877
CD0005	gyrB	DNA gyrase subunit B	0.757679	1.11147	Down	-0.152464	0.317343
CD0006	gyrA	DNA gyrase subunit A	0.909415	1.03716	Up	0.0526385	0.280713
CD0007		putative exported protein	0.401245	1.17641	Up	0.234386	0.178634
CD0008		putative membrane protein	0.82197	1.02549	Down	-0.0363085	0.100451
CD0009	rsbV	anti-sigma-B factor antagonist	0.527554	1.1173	Down	-0.160015	0.164308
CD0010	rsbW	anti-sigma-B factor (serine-protein kinase)	0.359722	1.11071	Down	-0.151479	0.104869
CD0011	sigB	RNA polymerase sigma-B factor	0.952455	1.02073	Down	-0.0296064	0.28031
CD0012		putative small-molecule-binding protein	0.149479	1.25086	Down	-0.32292	0.116925
CD0013		putative mechanosensitive ion channel protein	0.151644	1.50036	Down	-0.585312	0.213684
CD0014	serS1	seryl-tRNA synthetase	0.401036	1.26727	Down	-0.341724	0.260225
CD0015		putative cytosine/adenosine deaminase	0.680424	1.06323	Down	-0.0884499	0.140096
CD0016	dnaH	DNA polymerase III subunit gamma/tau	0.238672	1.88498	Down	-0.914546	0.451135
CD0017		conserved hypothetical protein	0.429635	1.39051	Down	-0.475614	0.388142
CD0018	recD	recombination protein	0.242714	1.45361	Down	-0.539645	0.275267
CD0019		putative glycosyl transferase	0.19815	1.49449	Up	0.579649	0.246866
CD0020		conserved hypothetical protein	0.0813326	1.48171	Down	-0.567266	0.151278
CD0021	pyc	pyruvate carboxylase	0.363783	1.50912	Down	-0.59371	0.415097
CD0022		putative translation elongation factor	0.688218	1.10843	Down	-0.148517	0.240714
CD0023	ctsR	transcriptional regulator	0.277895	2.41561	Up	1.27238	0.728414
CD0024		putative DNA repair protein	0.257774	1.94342	Up	0.9586	0.519471
CD0025		putative ATP:guanido phosphotransferase	0.32502	1.80123	Up	0.848983	0.543776
CD0026	clpC	ATP-dependent Clp protease	0.0644972	2.32896	Up	1.21969	0.292784
CD0027	radA	DNA repair protein	0.0674087	1.5109	Down	-0.595409	0.145641
CD0028		putative DNA-binding protein	0.28141	1.27589	Down	-0.351502	0.202702
CD0029		putative membrane protein	0.321046	1.30763	Down	-0.386956	0.244852
CD0030		putative membrane protein	0.695796	1.07808	Down	-0.108465	0.179984
CD0031		AraC-family transcriptional regulator	0.0531123	1.64407	Up	0.717274	0.15704
CD0032		putative beta-glucosidase	0.113986	1.17083	Up	0.227532	0.0711809
CD0033		putative beta-xylosidase	0.215161	1.28592	Up	0.362805	0.163074
CD0034		putative xylose transporter	0.678469	1.05762	Up	0.0808241	0.127008
CD0035		transcriptional regulator	0.52401	1.44725	Up	0.533313	0.541265
CD0036	acoA	acetoin:2,6-dichlorophenolindophenol oxidoreductase alpha subunit	0.0128353	2.13025	Up	1.09102	0.13
CD0037	acoB	acetoin:2,6-dichlorophenolindophenol oxidoreductase beta subunit	0.0288721	2.49679	Up	1.32007	0.220639
CD0038	acoC	E2 component of acetoin dehydrogenase enzyme system (dihydrolipoamide acetyltransferase)	0.0421361	1.85359	Up	0.890323	0.175261
CD0039	acoL	E3 component of acetoin dehydrogenase enzyme system (dihydrolipoyl dehydrogenase)	0.102126	1.51174	Up	0.596206	0.176409
CD0040		putative transcription antiterminator	0.616164	1.09257	Up	0.127723	0.166522
CD0041		PTS system, IIa component	0.21572	1.23363	Up	0.302914	0.136388
CD0042		PTS system, IIb component	0.512599	1.29949	Down	-0.37795	0.372837
CD0043		PTS system, IIc component	0.398498	1.29019	Up	0.367587	0.278211
CD0044		putative membrane protein	0.52064	1.12567	Up	0.170781	0.171537
CD0045		putative sugar-phosphate aldolase	0.241906	1.21177	Up	0.277119	0.139964
CD0046		putative lipoate-protein ligase	0.616551	1.13766	Down	-0.186067	0.243312
CD0047	ispD	2-C-methyl-D-erythritol 4-phosphate cytidylyltransferase	0.0588831	1.36385	Down	-0.447681	0.103142
CD0048	ispF	2-C-methyl-D-erythritol 2,4-cyclodiphosphate synthase	0.259879	1.28834	Down	-0.365513	0.199257
CD0049	proS	prolyl-tRNA synthetase	0.0292703	1.33077	Down	-0.412259	0.0693661
CD0050		putative dual-specificity prolyl/cysteinyl-tRNA synthetase	0.0573809	1.44042	Down	-0.526493	0.119299
CD0051	gltX	glutamyl-tRNA synthetase	0.552919	1.18995	Up	0.250905	0.274204
CD0052	cysS	cysteinyl-tRNA synthetase	0.0662337	1.61409	Down	-0.690724	0.167709
CD0053		conserved hypothetical protein	0.0179221	1.47762	Down	-0.563271	0.0778129
CD0054	thyX	putative thymidylate synthase	0.629217	1.11894	Down	-0.162129	0.220182
CD0055		putative tRNA/rRNA methyltransferase	0.255198	1.08602	Down	-0.119049	0.0640065
CD0056		conserved hypothetical protein	0.50912	1.12378	Down	-0.168364	0.164911
CD0057	sigH	RNA polymerase sigma-H factor	0.840138	1.06941	Up	0.0968217	0.29847
CD0058	tufA	elongation factor TU	0.154634	1.38449	Up	0.469358	0.173209
CD0058A	rpmG	50S ribosomal protein L33	0.856968	1.07559	Down	-0.10513	0.36336
CD0059	secE	preprotein translocase SecE subunit	0.632094	1.1649	Down	-0.220201	0.301996
CD0060	nusG	transcription antitermination protein	0.209179	1.22271	Down	-0.290087	0.128038
CD0061	rplK	50S ribosomal protein L11	0.656338	1.04347	Down	-0.061384	0.090282
CD0062	rplA	50S ribosomal protein L1	0.243625	1.14566	Down	-0.196181	0.100476
CD0063	rplJ	50S ribosomal protein L10	0.138702	1.27943	Down	-0.3555	0.123145
CD0064	rplL	50S ribosomal protein L7/L12	0.992077	1.00253	Up	0.00365174	0.199359
CD0065		NADP-dependent 7-alpha-hydroxysteroid dehydrogenase	0.112232	1.36346	Down	-0.447273	0.138883
CD0066	rpoB	DNA-directed RNA polymerase beta chain	0.32502	1.15219	Up	0.204373	0.130818
CD0067	rpoC	DNA-directed RNA polymerase beta' chain	0.991783	1.00386	Down	-0.00555607	0.291736
CD0068	rpsL	30S ribosomal protein S12	0.0903952	1.69918	Up	0.764841	0.214331
CD0069	rpsG	30S ribosomal protein S7	0.989333	1.00386	Down	-0.00555708	0.222407
CD0070	fusA	translation elongation factor G	0.414655	1.19821	Down	-0.260877	0.205991
CD0071	tufB	elongation factor TU	0.154634	1.38449	Up	0.469358	0.173209
CD0072	rpsJ	30S ribosomal protein S10	0.640496	1.15577	Down	-0.208851	0.29411
CD0073	rplC	50S ribosomal protein L3	0.829054	1.06959	Up	0.0970536	0.280186
CD0074	rplD	50S ribosomal protein L4	0.633935	1.12436	Up	0.169099	0.233447
CD0075	rplW	50S ribosomal protein L23	0.723173	1.09954	Up	0.136906	0.252474
CD0076	rplB	50S ribosomal protein L2	0.671055	1.11889	Up	0.162067	0.248938
CD0077	rpsS	30S ribosomal protein S19	0.387954	1.31878	Up	0.399209	0.295444
CD0078	rplV	50S ribosomal protein L22	0.410898	1.24947	Up	0.321313	0.250971
CD0079	rpsC	30S ribosomal protein S3	0.524276	1.157	Up	0.210384	0.213794
CD0080	rplP	50S ribosomal protein L16	0.302323	1.38951	Up	0.474577	0.28775
CD0080A	rpmC	50S ribosomal protein L29	0.242714	1.7207	Up	0.782993	0.397945
CD0081	rpsQ	30S ribosomal protein S17	0.238672	1.80357	Up	0.850855	0.417904
CD0082	rplN	50S ribosomal protein L14	0.18739	1.64224	Up	0.715667	0.293895
CD0083	rplX	50S ribosomal protein L24	0.125401	1.72558	Up	0.787085	0.258189
CD0084	rplE	50S ribosomal protein L5	0.0876407	1.852	Up	0.889085	0.24518
CD0084A	rpsN	30S ribosomal protein S14	0.0777704	2.08545	Up	1.06036	0.275472
CD0085	rpsH	30S ribosomal protein S8	0.0367623	1.88098	Up	0.911487	0.168888
CD0086	rplF	50S ribosomal protein L6	0.104542	1.51454	Up	0.598881	0.179121
CD0087	rplR	50S ribosomal protein L18	0.125711	1.36408	Up	0.447926	0.147233
CD0088	rpsE	30S ribosomal protein S5	0.242714	1.24075	Up	0.311215	0.158177
CD0088A	rpmD	50S ribosomal protein L30	0.538543	1.3287	Up	0.410018	0.431901
CD0089	rplO	50S ribosomal protein L15	0.264643	1.16214	Down	-0.21678	0.119626
CD0090	prlA	preprotein translocase SecY subunit	0.240849	1.11843	Down	-0.161478	0.0807385
CD0091	adk	adenylate kinase	0.122487	1.31198	Up	0.391749	0.126963
CD0092	map1	methionine aminopeptidase	0.0511676	1.33681	Up	0.418798	0.0904703
CD0093		putative ribosomal protein	0.0521515	1.73032	Up	0.791043	0.171886
CD0094	infA	translation initiation factor IF-1	0.0210807	1.66626	Up	0.73661	0.108148
CD0094A	rpmJ	50S ribosomal protein L36	0.195181	2.06048	Up	1.04298	0.440232
CD0095	rpsM	30S ribosomal protein S13	0.0782162	1.81214	Up	0.857692	0.22363
CD0096	rpsK	30S ribosomal protein S11	0.0282244	1.77448	Up	0.8274	0.13684
CD0097	rpsD	30S ribosomal protein S4	0.306825	1.28909	Up	0.366349	0.224493
CD0098	rpoA	DNA-directed RNA polymerase alpha chain	0.991082	1.00283	Up	0.00408037	0.187359
CD0099	rplQ	50S ribosomal protein L17	0.470364	1.1587	Down	-0.212512	0.189532
CD0100		ABC transporter, ATP-binding protein	0.275508	1.18463	Up	0.244438	0.139223
CD0101		ABC transporter, ATP-binding protein	0.0871334	1.26978	Up	0.344574	0.0948395
CD0102		ABC transporter, permease protein	0.253639	1.17561	Up	0.233412	0.124709
CD0103	truA1	tRNA pseudouridine synthase 1	0.908068	1.01803	Down	-0.0257771	0.134557
CD0104	rplM	50S ribosomal protein L13	0.467373	1.20436	Down	-0.268265	0.237421
CD0105	rpsI	30S ribosomal protein S9	0.385356	1.22024	Down	-0.287163	0.211172
CD0106	cwlD	germination-specific N-acetylmuramoyl-L-alanine amidase	0.0844525	1.63086	Down	-0.705629	0.191419
CD0107	aspC	aspartate aminotransferase	0.824494	1.0389	Down	-0.0550518	0.154461
CD0108	nrdD	anaerobic ribonucleoside-triphosphate reductase	0.32374	1.65594	Up	0.727653	0.463942
CD0109	nrdG	anaerobic ribonucleoside-triphosphate reductase activating protein	0.140611	1.28579	Up	0.362658	0.126944
CD0110		putative membrane protein	0.260536	1.39105	Down	-0.476179	0.260039
CD0111		putative exported protein	0.283442	1.21818	Down	-0.284733	0.165184
CD0111A		hypothetical protein	0.387954	1.47404	Down	-0.559778	0.414377
CD0112	ptb	phosphate butyryltransferase	0.731816	1.09405	Down	-0.129681	0.247015
CD0113	buk	butyrate kinase	0.788273	1.09232	Down	-0.127401	0.300134
CD0114		putative ATP/GTP-binding protein	0.999854	1.00022	Up	0.000318945	0.264556
CD0115		ferredoxin	0.80152	1.07114	Up	0.0991457	0.247685
CD0116		putative oxidoreductase, thiamine diP-binding subunit	0.600632	1.13642	Up	0.184499	0.230703
CD0117		putative subunit of oxidoreductase	0.415312	1.21235	Up	0.277805	0.219631
CD0118		putative subunit of oxidoreductase	0.359722	1.28257	Up	0.359034	0.248578
CD0119		phosphoglucomutase/phosphomannomutase mutase	0.381773	1.12295	Up	0.167296	0.121906
CD0120	glmS	glucosamine--fructose-6-phosphate aminotransferase [isomerizing]	0.317946	1.09154	Down	-0.126371	0.0794904
CD0121		putative thiosulfate sulfurtransferase	0.179942	1.3754	Down	-0.459849	0.183942
CD0122		putative exported protein	0.0291893	1.44976	Down	-0.535819	0.0900196
CD0123	murA	UDP-N-acetylglucosamine 1-carboxyvinyltransferase 1	0.227458	1.1683	Down	-0.224414	0.104485
CD0124	spoIIC	stage II sporulation protein D	0.851484	1.06552	Down	-0.0915512	0.302354
CD0125		putative cell wall endopeptidase	0.0752484	1.40556	Down	-0.491141	0.125831
CD0126	spoIIID	stage III sporulation protein D	0.304114	1.46918	Down	-0.555014	0.33825
CD0127	mreB1	rod shape-determining protein	0.0177244	1.60213	Up	0.679994	0.0930849
CD0128	fabZ	(3R)-hydroxymyristoyl-[acyl carrier protein] dehydratase	0.0621551	1.43211	Up	0.518147	0.122426
CD0129		conserved hypothetical protein	0.241011	1.20643	Up	0.270748	0.136129
CD0130	metE	S-adenosylmethionine synthetase	0.582313	1.18146	Up	0.240574	0.285609
CD0131		putative membrane protein	0.242365	1.7112	Down	-0.775007	0.392572
CD0132		putative DNA-binding protein	0.50222	1.15612	Up	0.209296	0.201182
CD0133		putative phosphoribosyl transferase (putative competence protein)	0.64767	1.09976	Down	-0.137186	0.197095
CD0134		putative transcription antiterminator	0.50355	1.22273	Up	0.29011	0.279908
CD0135		PTS system, IIa component	0.112998	1.47448	Up	0.560208	0.174659
CD0136		PTS system, IIb component	0.116024	1.62575	Up	0.701104	0.221266
CD0137		PTS system, IIc component	0.341969	1.43275	Up	0.518786	0.345391
CD0138		conserved hypothetical protein	0.616551	1.18404	Up	0.24372	0.318635
CD0139		glycosylasparaginase	0.717653	1.21162	Up	0.276932	0.501706
CD0140		putative peptidase	0.409515	1.1132	Up	0.154707	0.120326
CD0141		putative copper homeostasis protein	0.672855	1.08367	Up	0.115932	0.179034
CD0142		putative RNA-binding protein	0.351733	1.53512	Down	-0.618356	0.420944
CD0143	secA1	preprotein translocase SecA subunit	0.419425	1.19665	Down	-0.259006	0.206693
CD0144	prfB	peptide chain release factor 2	0.996926	1.00062	Down	-0.000900393	0.119491
CD0145		putative RNA-binding protein	0.112782	1.37495	Down	-0.459378	0.142987
CD0146		putative amidohydrolase	0.633935	1.06349	Up	0.0888093	0.122666
CD0147		putative riboflavin transporter	0.720825	1.12182	Down	-0.165836	0.303286
CD0148		conserved hypothetical protein	0.200722	1.667	Down	-0.737253	0.316493
CD0149		putative ATP/GTP hydrolase	0.253639	1.16375	Down	-0.218779	0.116735
CD0150		putative glycoprotease	0.587153	1.11543	Down	-0.157598	0.18917
CD0151	rimI	putative ribosomal-protein-alanine acetyltransferase	0.329663	1.16732	Up	0.223203	0.144674
CD0152	gcp	probable glycoprotease	0.125711	1.39915	Down	-0.484547	0.159116
CD0153	hpdB	4-hydroxyphenylacetate decarboxylase, catalytic subunit	0.579767	1.1553	Up	0.208262	0.245791
CD0154	hpdC	4-hydroxyphenylacetate decarboxylase, regulatory subunit	0.0438137	1.37187	Up	0.456142	0.0920787
CD0155	hpdA	4-hydroxyphenylacetate decarboxylase, activating subunit	0.231077	1.28967	Up	0.367003	0.173413
CD0156		putative membrane-associated CAAX amino terminal protease	0.984878	1.00739	Up	0.0106275	0.30458
CD0157		putative membrane protein (pseudogene)	0.364996	1.05143	Down	-0.0723591	0.0507825
CD0158		putative membrane protein (pseudogene)	0.364996	1.05143	Down	-0.0723591	0.0507825
CD0159		putative glyoxalase	0.140521	1.75928	Down	-0.814987	0.284872
CD0160		putative two-component response regulator	0.194986	1.19834	Up	0.26104	0.110082
CD0161		putative lantibiotic ABC transporter,ATP-binding protein	0.290518	1.2136	Down	-0.279288	0.16483
CD0162		Radical SAM-family protein	0.960268	1.01778	Up	0.0254199	0.286728
CD0163		hypothetical protein	0.732281	1.05686	Down	-0.0797861	0.152255
CD0163A		hypothetical protein	0.200791	1.32257	Up	0.403348	0.173219
CD0163B		hypothetical protein	0.477364	1.41894	Up	0.504814	0.457435
CD0164		putative membrane protein	0.588779	1.20185	Down	-0.265261	0.320123
CD0165		putative amino acid transporter	0.956562	1.01468	Down	-0.0210193	0.21385
CD0166		putative amidohydrolase/peptidase	0.0329212	1.90356	Down	-0.928698	0.164723
CD0167		putative sigma-54-dependent transcriptional regulator	0.630428	1.40573	Up	0.491317	0.66906
CD0168		putative cyclic nucleotide-binding protein	0.241598	1.54421	Up	0.626866	0.316301
CD0169		putative drug/sodium antiporter	0.238672	1.47916	Up	0.56478	0.274763
CD0170		putative ABC transporter, ATP-binding protein	0.000144396	1.61378	Up	0.690444	0.0125722
CD0171		putative DNA-binding protein	0.240985	1.19878	Up	0.261567	0.131405
CD0172		conserved hypothetical protein	0.897268	1.02898	Up	0.0412172	0.189113
CD0172A	fdxA	ferredoxin	0.321046	1.70513	Down	-0.769879	0.486998
CD0173		putative lipoprotein	0.0415331	1.16965	Down	-0.226078	0.0439305
CD0174		putative oxidoreductase, acetyl-CoA synthase subunit	0.0559641	1.32994	Down	-0.41136	0.0916083
CD0175		putative oxidoreductase, electron transfer subunit	0.141391	1.38196	Down	-0.466717	0.163844
CD0176			0.493768	1.20468	Down	-0.268645	0.253149
CD0177		cyclopropane-fatty-acyl-phospholipid synthase	0.831943	1.05773	Down	-0.0809767	0.238237
CD0178		putative ATP-binding protein	0.90246	1.01737	Up	0.0248413	0.120067
CD0179	gluD	NAD-specific glutamate dehydrogenase	0.50965	1.16285	Down	-0.217665	0.213459
CD0180		hypothetical protein	0.30312	1.39866	Up	0.484048	0.294296
CD0181		putative membrane-associated metalloprotease	0.46608	1.13615	Down	-0.18415	0.162564
CD0182		putative membrane protein	0.242714	1.20825	Up	0.272922	0.138873
CD0183		putative cell wall hydrolase	0.00984817	2.31528	Up	1.21118	0.118856
CD0184	pyrB	aspartate carbamoyltransferase catalytic chain	0.830872	1.06592	Down	-0.0920928	0.269135
CD0185	pyrK	dihydroorotate dehydrogenase electron transfer subunit	0.768431	1.15232	Down	-0.204545	0.443561
CD0186	pyrD	dihydroorotate dehydrogenase, catalytic subunit	0.86136	1.10656	Down	-0.146078	0.520178
CD0187	pyrE	orotate phosphoribosyltransferase	0.707981	1.2361	Down	-0.305793	0.533884
CD0188		putative ketopantoate reductase	0.863275	1.04171	Up	0.0589483	0.212827
CD0189		LysR-family transcriptional regulator	0.184711	1.4386	Down	-0.524664	0.2135
CD0190		putative membrane protein	0.185574	1.31475	Down	-0.394788	0.161329
CD0191		putative DNA glycosylase (DNA repair protein)	0.112998	1.58523	Down	-0.664694	0.207184
CD0192	cls	putative cardiolipin synthetase	0.0789308	1.31734	Down	-0.39763	0.104315
CD0193	groES	10 kDa chaperonin	0.0207	2.04323	Up	1.03085	0.3
CD0194	groEL	60 kDa chaperonin	0.0495952	2.61134	Up	1.38479	0.118
CD0195		putative membrane protein	0.104631	1.55424	Down	-0.636211	0.190857
CD0196		conserved hypothetical protein (pseudogene)	0.364996	1.05143	Down	-0.0723591	0.0507825
CD0198	guaA	GMP synthase [glutamine-hydrolyzing]	0.526889	1.05388	Down	-0.0757049	0.0775792
CD0199		putative membrane-associated nucleotidase	0.136128	1.3807	Down	-0.465395	0.159078
CD0200		LysR-family transcriptional regulator (partial)	0.855014	1.02968	Up	0.0421954	0.143836
CD0201		putative chromate transporter	0.359722	1.33337	Down	-0.415078	0.287191
CD0202		conserved hypothetical protein	0.770197	1.0996	Up	0.136984	0.299514
CD0203		putative DNA repair protein	0.555346	1.11314	Up	0.15463	0.170982
CD0204		putative signaling protein	0.589966	1.04862	Up	0.0684854	0.082899
CD0205		putative transcription antiterminator	0.0830536	2.07138	Down	-1.05059	0.28257
CD0206		PTS system, IIa component	0.0597438	2.10839	Down	-1.07615	0.250073
CD0207		PTS system, IIc component	0.238672	1.4951	Down	-0.580241	0.282842
CD0208		PTS system, IIb component	0.141323	1.87313	Down	-0.90545	0.317721
CD0209		putative sugar-phosphate kinase	0.182766	1.60782	Down	-0.685106	0.276307
CD0210		putative hydrolase	0.0421361	1.64311	Down	-0.71643	0.141772
CD0211	licC	CTP:phosphocholine cytidylyltransferase	0.421559	1.29191	Down	-0.369508	0.296288
CD0212		putative choline sulfatase	0.00971802	2.53902	Down	-1.34427	0.129463
CD0213		putative spore coat protein	0.401974	1.29932	Down	-0.377755	0.288362
CD0214		conserved hypothetical protein	0.238672	1.21105	Up	0.276262	0.134623
CD0215		transposase	0.00643938	2.25188	Up	1.17113	0.0934478
CD0216		transposase	0.00379871	2.273	Up	1.1846	0.0706004
CD0217		putative nitroreductase	0.909415	1.03986	Up	0.0563912	0.300632
CD0218	purE	phosphoribosylaminoimidazole carboxylase catalytic subunit	0.0483949	2.32668	Up	1.21827	0.258083
CD0219	purC	phosphoribosylaminoimidazole-succinocarboxamide synthase	0.0135237	2.17611	Up	1.12175	0.137314
CD0220	purF	amidophosphoribosyltransferase	0.0286777	1.6696	Up	0.739506	0.123192
CD0221	purG	phosphoribosylformylglycinamidine cyclo-ligase	0.0912859	1.48863	Up	0.573988	0.16195
CD0222	purN	phosphoribosylglycinamide formyltransferase	0.240849	1.33637	Up	0.418317	0.209206
CD0223	purH	bifunctional purine biosynthesis protein [includes: phosphoribosylaminoimidazolecarboxamide formyltransferase and IMP cyclohydrolase]	0.489466	1.20516	Up	0.269223	0.251161
CD0224	purD	phosphoribosylamine--glycine ligase	0.43656	1.18779	Up	0.248276	0.205721
CD0225	purL	formylglycinamidine ribonucleotide synthetase	0.906307	1.0229	Down	-0.0326607	0.16641
CD0226		putative transglycosylase	0.124707	1.38563	Down	-0.470547	0.153955
CD0227		conserved hypothetical protein	0.221678	1.23882	Down	-0.308961	0.141335
CD0228	fliN	flagellar motor switch protein	0.567417	1.21816	Up	0.284709	0.325726
CD0229	flgM	negative regulator of flagellin synthesis (anti-sigma-d factor)	0.627724	1.558	Down	-0.639693	0.864945
CD0230	FlgN	putative flagellar biosynthesis protein	0.242714	1.74144	Down	-0.80028	0.406917
CD0231	flgK	putative flagellar hook-associated protein	0.129345	1.83672	Down	-0.877135	0.291804
CD0232	flgL	flagellar hook-associated protein	0.322268	1.31349	Down	-0.393406	0.249911
CD0233	FliW	conserved hypothetical protein	0.554739	1.12807	Down	-0.173862	0.191613
CD0234	csrA	carbon storage regulator	0.570058	1.1373	Up	0.185619	0.213916
CD0235	fliS1	flagellar protein FliS	0.76805	1.06821	Up	0.0952012	0.20556
CD0236	fliS2	flagellar protein	0.89039	1.06469	Up	0.0904313	0.39245
CD0237	fliD	flagellar cap protein	0.0890254	1.50933	Down	-0.593907	0.164717
CD0238	FliT	conserved hypothetical protein	0.141788	1.73689	Down	-0.796508	0.280028
CD0239	fliC	flagellin subunit	0.0109169	3.99822	Down	-1.99936	0.21084
CD0240		putative glycosyltransferase	0.116602	1.94606	Down	-0.960554	0.304197
CD0241		phosphoserine phosphatase	0.0667047	1.87235	Down	-0.904854	0.220399
CD0242		conserved hypothetical protein (GTA type glycosyl transferase)	0.0632933	2.03676	Down	-1.02628	0.244755
CD0243		conserved hypothetical protein (UbiE type methyltransferase)	0.0674087	2.0386	Down	-1.02758	0.251417
CD0244		putative CDP-Glycerol:Poly(glycerophosphate) glycerophosphotransferase	0.202738	1.41947	Down	-0.505352	0.218456
CD0245	flgB	flagellar basal-body rod protein	0.238672	1.82563	Up	0.868396	0.427651
CD0246	flgC	flagellar basal-body rod protein	0.00575034	2.0115	Up	1.00827	0.0754017
CD0247	fliE	flagellar hook-basal body complex protein	0.0119045	2.22059	Up	1.15094	0.130616
CD0248	fliF	flagellar M-ring protein	0.0125159	2.30495	Up	1.20474	0.139998
CD0249	fliG	flagellar motor switch protein	0.0421361	2.50926	Up	1.32726	0.262169
CD0250	fliH	flagellar assembly protein	0.0421361	2.712	Up	1.43936	0.283567
CD0251	fliI	flagellum-specific ATP synthase	0.0360082	2.28785	Up	1.194	0.219692
CD0252	fliJ	flagellar protein	0.073301	2.7561	Up	1.46263	0.369856
CD0253	fliK	putative flagellar hook-length control protein	0.0128756	2.83175	Up	1.5017	0.179398
CD0254	flgD	putative basal-body rod modification protein	0.00316998	2.85707	Up	1.51454	0.0797938
CD0255	flgE	flagellar hook protein	0.0314652	2.13115	Up	1.09163	0.18865
CD0255A		putative flagellar protein (FlbD superfamily	0.0112227	2.25413	Up	1.17257	0.12504
CD0256	motA	chemotaxis protein	0.0111624	2.47762	Up	1.30896	0.139054
CD0257	motB	chemotaxis protein	0.013348	2.35385	Up	1.23502	0.150486
CD0258	fliL	flagellar basal body-associated protein	0.0173896	2.19494	Up	1.13418	0.15409
CD0259		putative flagellar protein	0.0141254	2.20379	Up	1.13998	0.144483
CD0260	fliP	flagellar biosynthetic protein	0.0599344	2.1256	Up	1.08787	0.253365
CD0261	fliQ	flagellar export protein	0.0912859	2.14263	Up	1.09938	0.310202
CD0262	FliR / flhB	bifunctional flagellar biosynthesis protein FliR/FlhB	0.0360082	1.87915	Up	0.910081	0.167339
CD0263	flhA	flagellar export protein	0.0796748	2.06719	Up	1.04767	0.275893
CD0264	flhF	signal recognition particle complex, GTP-binding subunit	0.238672	1.5939	Up	0.672562	0.331412
CD0265	fleN	flagellar number regulator	0.222557	1.41574	Up	0.501559	0.230029
CD0266	fliA	RNA polymerase sigma factor for flagellar operon	0.0799032	1.61996	Up	0.695956	0.184046
CD0267		putative exported protein	0.283752	1.50747	Up	0.592132	0.343925
CD0268	flgG	flagellar basal-body rod protein FlgG	0.479113	1.43244	Up	0.518478	0.471636
CD0269		putative flagellar basal-body rod protein FlgG	0.50355	1.32206	Up	0.402791	0.388532
CD0270	fliM	putative flagellar motor switch protein	0.283184	1.66378	Up	0.734464	0.425329
CD0272		conserved hypothetical protein (tetracopeptide repeat)	0.36883	1.38221	Up	0.466975	0.330781
CD0273	htpG	chaperone protein (heat shock protein)	0.145533	2.02909	Up	1.02083	0.365253
CD0274	dhaT	putative 1,3-propanediol dehydrogenase	0.0800986	1.33322	Up	0.414914	0.109868
CD0275	spl	spore photoproduct lyase	0.034251	1.38981	Up	0.474888	0.0853266
CD0276		AraC-family transcriptional regulator	0.560698	1.0486	Up	0.0684646	0.076721
CD0277		conserved hypothetical protein	0.888314	1.02596	Up	0.0369811	0.157399
CD0278		putative transcriptional regulator	0.240985	1.42059	Up	0.506493	0.254372
CD0279		conserved hypothetical protein	0.185574	1.67354	Up	0.742905	0.30348
CD0279A		conserved hypothetical protein	0.248963	1.8983	Up	0.924708	0.485228
CD0281		putative exported protein	0.0708808	1.73656	Down	-0.796229	0.199058
CD0282		putative phosphoesterase	0.244329	2.22948	Down	-1.15671	0.594535
CD0283		putative transcription antiterminator	0.944017	1.02172	Down	-0.0310007	0.256125
CD0284		PTS system, IIa component	0.0597438	2.70119	Down	-1.4336	0.332676
CD0285		PTS system, IIb component	0.0240752	2.10724	Down	-1.07536	0.166309
CD0286		putative PTS system, IIa component	0.0207801	2.75146	Down	-1.4602	0.213201
CD0287		PTS system, IIb component	0.0294134	2.33485	Down	-1.22333	0.206244
CD0288		PTS system, IIc component	0.162441	1.37807	Down	-0.46265	0.175301
CD0289		PTS system, IId component	0.155194	1.22735	Down	-0.295545	0.109245
CD0290		hypothetical protein	0.317946	1.20706	Down	-0.271497	0.170797
CD0291		putative peptidase	0.586469	1.10619	Down	-0.145598	0.174493
CD0292		DNA-binding protein	0.905637	1.02826	Down	-0.040211	0.202679
CD0293		ABC transporter, ATP-binding protein	0.656466	1.04185	Up	0.0591462	0.0871268
CD0294		putative ABC transporter, permease protein	0.783513	1.1412	Up	0.190555	0.440377
CD0295		putative iron-sulfur-binding protein	0.0619952	1.52056	Up	0.6046	0.142672
CD0296		hypothetical protein	0.167838	1.56558	Up	0.646696	0.249298
CD0297		putative biotin synthase	0.0796748	1.68477	Down	-0.75255	0.198248
CD0298	rbsR	putative ribose operon repressor	0.757253	1.09987	Down	-0.137339	0.285356
CD0299	rbsK	putative ribokinase	0.960213	1.02004	Up	0.0286199	0.319098
CD0300	rbsB	D-ribose ABC transporter, substrate-binding protein	0.854153	1.13667	Up	0.184819	0.625726
CD0301	rbsA	ribose ABC transporter, ATP-binding protein	0.587342	1.57104	Up	0.651719	0.783668
CD0302	rbsC	ribose ABC transporter, permease protein	0.468408	1.56847	Up	0.649357	0.575769
CD0303	argE	putative acetylornithine deacetylase	0.502969	1.44309	Up	0.529158	0.509777
CD0304		conserved hypothetical protein	0.381536	1.87597	Up	0.907635	0.660319
CD0305	abgB1	putative aminobenzoyl-glutamate utilization protein	0.851877	1.11126	Up	0.152191	0.504486
CD0306		conserved hypothetical protein	0.215882	1.52552	Down	-0.609306	0.274813
CD0307		putative 'four-disulfide core' protein	0.905637	1.02025	Down	-0.0289214	0.145522
CD0308		putative membrane protein	0.606758	1.08086	Down	-0.11218	0.142593
CD0309		putative phosphoserine phosphatase	0.172145	1.43534	Down	-0.521393	0.203662
CD0310		hypothetical protein	0.541577	1.29045	Down	-0.367877	0.390703
CD0311		hypothetical protein	0.566398	1.30316	Down	-0.382014	0.435388
CD0312		ArsR-family transcriptional regulator	0.254592	2.21847	Down	-1.14956	0.616893
CD0313		putative heavy-metal-transporting ATPase	0.354852	1.98497	Down	-0.989118	0.677336
CD0314		putative membrane protein	0.337859	1.72716	Down	-0.788401	0.520627
CD0315		hypothetical protein	0.507719	1.42681	Up	0.512798	0.50018
CD0316		putative ABC transporter, permease protein	0.238672	1.38754	Up	0.47253	0.233867
CD0317		putative ABC transporter, permease protein	0.407362	1.28608	Up	0.362978	0.280538
CD0318		ABC transporter, ATP-binding protein	0.267087	1.32055	Up	0.401134	0.22298
CD0319		two-component sensor histidine kinase	0.238672	1.33291	Up	0.414584	0.203714
CD0320		two-component response regulator	0.323311	1.19591	Up	0.258113	0.164306
CD0321		hypothetical protein	0.234329	1.33947	Up	0.421663	0.201386
CD0322		conserved hypothetical protein	0.169733	1.37973	Up	0.464382	0.179963
CD0323		hypothetical protein	0.624982	1.11141	Up	0.15239	0.204553
CD0324	cbiM	putative cobalt transport protein	0.290816	1.21771	Up	0.284169	0.167833
CD0325	cbiN	cobalt transport protein	0.371791	1.16243	Up	0.217147	0.155067
CD0326	cbiQ	cobalt transport protein	0.0796817	1.40507	Up	0.490639	0.129309
CD0327	cbiO	cobalt ABC transporter, ATP-binding protein	0.0335183	1.70169	Up	0.766968	0.137023
CD0328	pcrA	ATP-dependent DNA helicase	0.0346772	1.46335	Up	0.549278	0.099127
CD0329		putative aspartyl aminopeptidase	0.0546787	1.49639	Up	0.581483	0.128558
CD0330		conserved hypothetical protein	0.194986	1.46914	Up	0.554976	0.233887
CD0331	ppiB	peptidyl-prolyl cis-trans isomerase	0.240985	1.39974	Up	0.485158	0.243086
CD0332	bclA1	putative exosporium glycoprotein	0.52193	1.2663	Down	-0.340622	0.344119
CD0333	ppaC	manganese-dependent inorganic pyrophosphatase	0.135828	1.30183	Up	0.380542	0.129926
CD0334	adhE	aldehyde-alcohol dehydrogenase [includes: alcohol dehydrogenase and pyruvate-formate-lyase deactivase	0.695796	1.13858	Up	0.187236	0.311027
CD0335		hypothetical protein	0.701814	1.19539	Up	0.257487	0.440173
CD0336		ABC transporter, ATP-binding protein	0.64767	1.27151	Up	0.346541	0.497687
CD0337		ABC transporter, permease protein	0.900871	1.05201	Down	-0.073152	0.349581
CD0338		two-component sensor histidine kinase	0.143751	1.24855	Up	0.320252	0.113598
CD0339		two-component response regulator	0.242535	1.33064	Up	0.412125	0.208866
CD0340		conserved hypothetical protein	0.803922	1.09335	Up	0.128759	0.32648
CD0341		conserved hypothetical protein	0.269662	1.20135	Down	-0.264651	0.148108
CD0342		hypothetical protein	0.265194	1.24274	Up	0.313524	0.17327
CD0343		hypothetical protein	0.160753	1.44238	Down	-0.528446	0.199136
CD0344		metallo-beta-lactamase superfamily protein	0.183484	1.29591	Down	-0.373963	0.151441
CD0345		putative guanosine 3',5'-bis-pyrophosphate (ppGpp) synthesis/degradation protein	0.699475	1.085	Down	-0.117695	0.198199
CD0346		putative phosphoesterase	0.144935	1.86715	Down	-0.900837	0.321356
CD0347		putative exported protein	0.364425	1.61024	Down	-0.687272	0.481552
CD0348		conserved hypothetical protein (pseudogene)	0.364996	1.05143	Down	-0.0723591	0.0507825
CD0350		conserved hypothetical protein	0.0240752	1.69583	Down	-0.76199	0.118125
CD0351		hypothetical protein	0.00813859	1.62254	Down	-0.698254	0.0613673
CD0352		putative transcriptional regulator	0.045829	3.10317	Down	-1.63374	0.339881
CD0353		hypothetical protein	0.0927372	2.90409	Down	-1.53809	0.436147
CD0354		putative membrane protein	0.0777704	1.36313	Down	-0.446925	0.116014
CD0354A		putative membrane protein	0.0777704	1.36313	Down	-0.446925	0.116014
CD0355	int-Tn	integrase	0.103859	1.43489	Up	0.520938	0.155228
CD0356	xis	excisionase	0.388815	1.17906	Up	0.237633	0.176313
CD0356A			0.300184	1.38324	Up	0.468048	0.28248
CD0358		conjugative transposon conserved hypothetical protein	0.820277	1.07185	Up	0.1001	0.274146
CD0359		conjugative transposon conserved hypothetical protein	0.402163	1.2713	Up	0.346308	0.2645
CD0360		putative transcriptional regulator	0.200564	1.53244	Up	0.615827	0.264179
CD0361		two-component system, sensor histidine kinase	0.905637	1.05578	Up	0.0783112	0.393336
CD0362		two-component system, response regulator	0.753289	1.09744	Up	0.134145	0.274085
CD0363		putative lantibiotic ABC transporter, membrane protein	0.282519	1.40589	Up	0.491484	0.284148
CD0364		putative lantibiotic ABC transporter,ATP-binding protein	0.962248	1.02018	Up	0.0288261	0.347005
CD0365		putative lantibiotic ABC transporter, permease protein	0.151594	1.45493	Up	0.540947	0.197408
CD0366		putative lantibiotic ABC transporter,ATP-binding protein	0.169284	1.31477	Up	0.394813	0.152777
CD0367		two-component system, sensor histidine kinase	0.663749	1.16171	Up	0.216253	0.325482
CD0368		two-component system, response regulator	0.326372	1.31934	Up	0.399814	0.256794
CD0369		hypothetical protein	0.329237	1.34735	Up	0.430127	0.278465
CD0370		putative transcriptional regulator	0.471968	1.27457	Up	0.350013	0.313466
CD0371		conjugative transposon protein	0.282478	1.20229	Up	0.265779	0.153599
CD0372		putative cell wall hydrolase	0.566896	1.31164	Up	0.39137	0.446586
CD0373		conjugative transposon protein	0.238672	1.20382	Up	0.26762	0.132487
CD0374		conjugative transposon protein	0.254606	1.18353	Up	0.243093	0.130542
CD0375		conjugative transposon protein	0.956832	1.01569	Down	-0.0224536	0.230943
CD0376		conjugative tranposon protein	0.238672	1.55197	Down	-0.634102	0.310173
CD0377		conjugative tansposon protein	0.885508	1.05052	Down	-0.0711039	0.296954
CD0379		conjugative transposon protein	0.7075	1.15564	Up	0.208692	0.36301
CD0380		conjugative transposon protein	0.970738	1.00934	Down	-0.0134178	0.201405
CD0381		putative conjugative transposon replication initiation factor	0.954686	1.01862	Up	0.0266226	0.262456
CD0382		hypothetical protein	0.0291893	1.80469	Down	-0.851749	0.142979
CD0383		conjugative transposon FtsK/SpoIIIE-related protein	0.505992	1.22906	Down	-0.297555	0.288457
CD0384		conjugative transposon protein	0.539663	1.18566	Down	-0.245689	0.259694
CD0385		conjugative transposon protein	0.180893	1.32304	Down	-0.403858	0.161971
CD0385A		hypothetical protein	0.424884	1.30837	Down	-0.387775	0.312991
CD0386		putative collagen-binding surface protein	0.0596216	2.31358	Down	-1.21013	0.280364
CD0387		putative membrane protein	0.700749	1.11707	Up	0.15972	0.270658
CD0388	bglF	PTS system, beta-glucoside-specific IIabc component	0.193856	1.96895	Down	-0.977426	0.409094
CD0389	bglA	6-phospho-beta-glucosidase	0.162211	1.79972	Down	-0.847773	0.320938
CD0390	bglG	beta-glucoside bgl operon transcription antiterminator	0.00414308	1.56902	Down	-0.649864	0.0400939
CD0391		asparagine synthetase [glutamine-hydrolyzing]	0.367217	1.3556	Down	-0.438935	0.309614
CD0392		Radical SAM-superfamily protein	0.727461	1.05991	Up	0.0839354	0.157289
CD0393		putative membrane protein	0.700749	1.11707	Up	0.15972	0.270658
CD0394	ldhA	(R)-2-hydroxyisocaproate dehydrogenase	0.894422	1.04004	Down	-0.0566425	0.252808
CD0395	hadA	isocaprenoyl-CoA:2-hydroxyisocaproate CoA-transferase	0.570033	1.16801	Down	-0.224054	0.25811
CD0396	hadI	activator of 2-hydroxyisocaproyl-CoA dehydratase	0.993819	1.00318	Down	-0.00458552	0.328089
CD0397	hadB	subunit of oxygen-sensitive 2-hydroxyisocaproyl-CoA dehydratase	0.800142	1.09312	Up	0.128457	0.318554
CD0398	hadC	subunit of oxygen-sensitive 2-hydroxyisocaproyl-CoA dehydratase	0.755279	1.11733	Up	0.160062	0.329787
CD0399	acdB	acyl-CoA dehydrogenase, short-chain specific	0.695796	1.15645	Up	0.209699	0.348149
CD0400	etfB1	electron transfer flavoprotein beta-subunit	0.897935	1.05485	Up	0.0770365	0.355915
CD0401	etfA1	electron transfer flavoprotein alpha-subunit	0.841642	1.06815	Up	0.0951103	0.295884
CD0402		sigma-54-dependent transcriptional regulator	0.201084	1.48473	Up	0.570201	0.24513
CD0403	fba	putative fructose-bisphosphate aldolase	0.633578	1.32009	Up	0.400639	0.552339
CD0404		conserved hypothetical protein	0.6774	1.13236	Up	0.179331	0.280642
CD0405		putative RNA pseudouridine synthase	0.895258	1.06596	Down	-0.0921549	0.414413
CD0406		putative tRNA (Uracil-5-)-methyltransferase	0.594494	1.16905	Up	0.225335	0.275812
CD0408		hypothetical protein	0.500212	1.08488	Up	0.117531	0.112498
CD0408A		putative membrane protein	0.721928	1.09597	Up	0.132213	0.242817
CD0409		putative replication initiation protein	0.351851	1.16523	Up	0.220614	0.150245
CD0410		putative DNA replication protein	0.532564	1.13661	Up	0.184736	0.191752
CD0411		conserved hypothetical protein	0.937687	1.01167	Down	-0.0167393	0.124272
CD0412		putative conjugal transfer protein	0.986996	1.00737	Down	-0.0105927	0.344271
CD0412A		conserved hypothetical protein	0.253639	1.19828	Up	0.26096	0.139377
CD0413		putative single-strand binding protein	0.903339	1.03089	Down	-0.0438851	0.214624
CD0414		putativel membrane protein	0.445887	1.2228	Up	0.290183	0.245395
CD0415		putative membrane protein	0.747062	1.10988	Down	-0.150398	0.301204
CD0416		putative exported protein	0.599528	1.09956	Up	0.136925	0.170693
CD0417		putative membrane protein	0.521955	1.36672	Up	0.450722	0.455509
CD0418		putative conjugal transfer protein	0.238672	1.20236	Up	0.265867	0.130155
CD0419		conserved hypothetical protein	0.231388	1.20769	Up	0.27225	0.128935
CD0419A		hypothetical protein	0.251083	1.19773	Up	0.2603	0.137673
CD0420		putative cell surface protein	0.835151	1.07136	Up	0.099447	0.297209
CD0421		putative DNA topoisomerase	0.28471	1.17821	Up	0.236599	0.137759
CD0422		conserved hypothetical protein	0.480652	1.40308	Down	-0.488592	0.446655
CD0423		putative helicase	0.581639	1.18686	Down	-0.247145	0.292961
CD0424		putative single-strand binding protein	0.633935	1.147	Down	-0.19786	0.273367
CD0425		putative mobilization protein	0.412102	1.09796	Up	0.134827	0.105946
CD0426		putative mobilization protein	0.59502	1.04218	Up	0.0596063	0.0732186
CD0427		putative DNA-binding protein	0.0854732	1.83177	Up	0.873238	0.238085
CD0428		AraC-family transcriptional regulator	0.0169566	1.41951	Up	0.505396	0.0678772
CD0429		putative membrane protein	0.359762	1.21071	Up	0.275858	0.19105
CD0430		putative membrane protein	0.869566	1.06884	Up	0.0960431	0.359521
CD0431		ABC transporter, ATP-binding protein	0.783184	1.10271	Up	0.141049	0.324978
CD0432		ABC transporter, ATP-binding/permease protein	0.174602	1.32014	Up	0.40069	0.157456
CD0433		ABC transporter, ATP-binding/permease protein	0.552947	1.2698	Up	0.344597	0.376739
CD0434		putative drug/sodium antiporter	0.183654	1.46139	Up	0.547343	0.222095
CD0435		putative sigma factor	0.242714	1.2955	Up	0.373514	0.18996
CD0435A		hypothetical protein	0.254592	1.19261	Up	0.254118	0.136249
CD0436		putative recombinase	0.425597	1.36369	Down	-0.447512	0.362376
CD0437		integrase (partial)	0.292561	1.59399	Down	-0.672644	0.39899
CD0437A		hypothetical protein	0.490889	1.10718	Up	0.146891	0.13767
CD0438		putative exported protein	0.057804	2.03435	Up	1.02457	0.232985
CD0439		conserved hypothetical protein	0.183484	1.6774	Up	0.746228	0.302047
CD0440		cell surface protein	0.0231282	2.69911	Down	-1.43248	0.216089
CD0440A		regulatory protein (partial)	0.255865	1.19007	Up	0.251044	0.135276
CD0441	rocR	putative arginine utilization sigma-54 dependent regulatory protein	0.568325	1.15973	Down	-0.213783	0.2453
CD0442		putative oxidoreductase	0.520536	1.08777	Up	0.12138	0.121821
CD0443		conserved hypothetical protein	0.52193	1.09552	Down	-0.131614	0.132937
CD0444		putative pyridoxal-phosphate dependent enzyme	0.62484	1.09436	Up	0.130083	0.174271
CD0445	oraS	D-ornithine aminomutase S component	0.104969	1.23796	Up	0.307959	0.0926813
CD0446	oraE	D-ornithine aminomutase E component	0.175929	1.18307	Up	0.242533	0.095977
CD0447		putative component of D-ornithine aminomutase	0.22806	1.14474	Up	0.195024	0.0911734
CD0448		putative amino acid racemase	0.238672	1.20991	Up	0.274905	0.135574
CD0449		Na+/H+ antiporter	0.69211	1.06835	Up	0.0953858	0.156681
CD0450		conserved hypothetical protein	0.368697	1.18637	Up	0.246559	0.174389
CD0451		conserved hypothetical protein	0.0418797	1.45021	Up	0.536261	0.104838
CD0452		putative DNA repair protein	0.238672	1.44802	Up	0.534083	0.262948
CD0453		putative phosphohydrolase	0.266007	1.41292	Up	0.498675	0.276296
CD0453A		hypothetical protein	0.327951	1.41693	Up	0.50277	0.324009
CD0453B		hypothetical protein	0.506831	1.27058	Up	0.345492	0.336164
CD0454		AraC-family transcriptional regulator	0.10033	1.41619	Up	0.502018	0.147287
CD0455		conserved hypothetical protein	0.92763	1.03233	Down	-0.04591	0.299951
CD0456		putative antibiotic resistance ABC transporter,ATP-binding protein	0.243625	1.20675	Up	0.271125	0.13886
CD0457		putative membrane protein	0.464417	1.30137	Up	0.380028	0.334441
CD0458		putative beta-lactamase	0.123983	1.27704	Up	0.352801	0.115046
CD0459		ABC transporter, ATP-binding protein	0.321322	1.13973	Down	-0.188696	0.119514
CD0460		ABC transporter, permease protein	0.263636	1.15935	Down	-0.21331	0.117373
CD0461		two-component sensor histidine kinase	0.483953	1.20372	Up	0.267496	0.246143
CD0462		two-component response regulator	0.554748	1.18961	Up	0.250488	0.276248
CD0463		TetR-family transcriptional regulator	0.939878	1.01511	Up	0.0216396	0.167388
CD0464		putative hydrolase	0.91226	1.023	Up	0.0327999	0.179608
CD0465		RpiR-family transcriptional regulator	0.124261	2.0521	Up	1.0371	0.338746
CD0466		RpiR-family transcriptional regulator	0.0597438	2.0053	Up	1.00382	0.233059
CD0467		putative hydrolase	0.0686498	1.46847	Up	0.554315	0.137001
CD0468	malL	oligo-1,6-glucosidase	0.0521681	2.10237	Up	1.07202	0.23318
CD0469		PTS system, IIabc component	0.112218	2.7788	Up	1.47446	0.457577
CD0470	blaR	putative beta-lactamase-inducing penicillin-binding protein	0.31409	1.60881	Down	-0.685998	0.42741
CD0471	blaI	penicillinase repressor	0.232256	1.45242	Down	-0.538459	0.255849
CD0472		putative iron-sulfur flavoprotein	0.00984817	1.19877	Down	-0.261555	0.0255276
CD0473		MarR-family transcriptional regulator	0.709613	1.06708	Down	-0.0936683	0.164585
CD0474		putative iron-sulfur protein	0.364425	1.17406	Down	-0.231503	0.162213
CD0475		conserved hypothetical protein	0.0291893	1.99011	Down	-0.992851	0.166526
CD0476		hypothetical protein	0.470268	1.16724	Down	-0.223103	0.198891
CD0477		hypothetical protein	0.157481	1.52755	Down	-0.611216	0.227631
CD0478	spaF	putative lantibiotic ABC transporter,ATP-binding protein	0.624612	1.17794	Up	0.236266	0.315341
CD0479	spaE	putative lantibiotic ABC transporter, permease protein	0.59059	1.21386	Down	-0.279602	0.339249
CD0480	spaG	putative lantibiotic ABC transporter, permease protein	0.797857	1.11764	Down	-0.160452	0.394155
CD0481	spaR	putative lantibiotic resistance two-component response regulator	0.361843	1.14031	Up	0.189424	0.131857
CD0482	spaK	putative lantibiotic resistance two-component sensor kinase	0.756224	1.09179	Up	0.126701	0.261979
CD0483		ABC transporter, permease protein	0.908068	1.02876	Up	0.0409087	0.213714
CD0484		ABC transporter, ATP-binding protein	0.308885	1.2309	Up	0.299716	0.184377
CD0485		two-component sensor histidine kinase	0.841067	1.05566	Up	0.0781453	0.242093
CD0486		two-component response regulator	0.11691	1.20905	Up	0.273877	0.0868518
CD0487		putative carbon-nitrogen hydrolase	0.381178	1.22329	Down	-0.290769	0.211373
CD0488	sugE	quaternary ammonium compound-resistance protein	0.416421	1.47139	Down	-0.557179	0.442048
CD0489		putative phosphoribosylaminoimidazole-succinocarboxamide synthase	0.206857	1.23041	Up	0.299137	0.130921
CD0490		putative sugar-phosphate dehydrogenase	0.00379871	2.37373	Down	-1.24716	0.0745477
CD0491		PTS system, IIa component	0.173143	1.38599	Down	-0.470919	0.184419
CD0492		PTS system, IIb component	0.123557	1.5107	Down	-0.595221	0.193842
CD0493		PTS system, IIc component	0.536238	1.11804	Down	-0.160971	0.168707
CD0494		PTS system, IId component	0.777863	1.06543	Up	0.091435	0.206098
CD0495		putative regulatory protein (pseudogene)	0.364996	1.05143	Down	-0.0723591	0.0507825
CD0496	orf23	conjugative transposon protein	0.04475	6.28149	Down	-2.65111	0.54441
CD0497	orf22	conjugative transposon protein	0.0599344	5.72478	Down	-2.51722	0.58628
CD0498	orf21	conjugative transposon FtsK/SpoIIIE-family protein	0.0164877	8.11168	Down	-3.02	0.401469
CD0498A		conjugative transposon hypothetical protein	0.0100527	9.36082	Down	-3.22663	0.324792
CD0499	orf20	putative conjugative transposon replication initiation factor	0.0119045	7.67733	Down	-2.9406	0.330708
CD0499A	orf19	conjugative transposon protein	0.0100527	7.53437	Down	-2.91349	0.297098
CD0500	orf18	conjugative transposon protein	0.0112722	8.50528	Down	-3.08836	0.330786
CD0501	orf17	conjugative transposon membrane protein	0.0391857	6.70735	Down	-2.74574	0.521222
CD0502	orf16	conjugative transposon ATP/GTP-binding protein	0.0421361	5.52735	Down	-2.46659	0.487632
CD0503	orf15	conjugative transposon membrane protein	0.0991769	3.83957	Down	-1.94095	0.56552
CD0504	orf14	putative cell wall hydrolase	0.0734931	4.72973	Down	-2.24176	0.568263
CD0506		group II intron reverse transcriptase/maturase	0.00713759	14.1234	Down	-3.82001	0.313826
CD0507	orf13	putative conjugative transposon exported protein	0.0100527	6.49133	Down	-2.69851	0.274026
CD0508	tetM	conjugative transposon tetracycline resistance protein	0.661944	1.03578	Down	-0.0507154	0.07589
CD0508A	orf6	conjugative transposon protein	0.548668	1.08404	Up	0.116413	0.126159
CD0509	orf9	putative conjugative transposon regulatory protein	0.211381	1.37935	Up	0.463988	0.206402
CD0509A	orf10	putative conjugative transposon protein	0.815621	1.05203	Down	-0.0731698	0.19655
CD0510	orf7	putative conjugative transposon regulatory protein	0.0662337	2.11588	Down	-1.08126	0.262405
CD0510A	orf8	conjugative transposon protein	0.058432	2.10372	Down	-1.07295	0.246199
CD0510B	orf5	conjugative transposon protein (partial)	0.248873	1.78088	Down	-0.832591	0.436353
CD0511	tndX	conjugative transposon site-specific recombinase	0.00907833	3.67734	Down	-1.87866	0.172773
CD0513		putative membrane protein	0.628001	1.25104	Up	0.323131	0.437462
CD0514	cwpV	cell surface protein (putative hemagglutinin/adhesin)	0.0507036	1.57846	Down	-0.658518	0.141706
CD0515		D-alanyl-D-alanine carboxypeptidase	0.970922	1.00723	Down	-0.0103884	0.158596
CD0516		putative transcription antiterminator	0.601902	1.10252	Down	-0.140811	0.176942
CD0517		putative membrane protein	0.275148	1.47495	Down	-0.560666	0.319003
CD0518		putative membrane protein	0.332887	1.31882	Down	-0.399243	0.260844
CD0519		putative membrane protein	0.933487	1.01792	Up	0.0256172	0.180574
CD0520		two-component sensor histidine kinase	0.154628	1.69522	Down	-0.761477	0.28084
CD0521		two-component response regulator	0.83315	1.11694	Down	-0.15955	0.472775
CD0522		putative signaling protein	0.958474	1.02956	Down	-0.042024	0.449036
CD0523		putative transcriptional regulator	0.526889	1.13679	Up	0.184968	0.189384
CD0524		putative peptidase	0.253639	2.53226	Down	-1.34043	0.716002
CD0525		putative aminobenzoyl-glutamate transporter (pseudogene)	0.364996	1.05143	Down	-0.0723591	0.0507825
CD0526		putative aminobenzoyl-glutamate transporter (pseudogene)	0.364996	1.05143	Down	-0.0723591	0.0507825
CD0527		metallo-beta-lactamase superfamily hydrolase	0.364088	1.49927	Up	0.584261	0.408879
CD0528		putative amidohydrolase	0.378254	1.27892	Up	0.35492	0.256367
CD0529		putative membrane protein	0.493768	1.17773	Up	0.236003	0.22245
CD0530		putative membrane protein	0.24221	1.60911	Down	-0.686261	0.347115
CD0531		DeoR-family transcriptional regulator	0.412039	1.2606	Up	0.334116	0.261984
CD0532		conserved hypothetical protein	0.310231	1.36914	Up	0.453269	0.279877
CD0533	cheB	chemotaxis protein	0.771634	1.08003	Up	0.111071	0.244326
CD0534	cheC	chemotaxis protein CheC	0.625318	1.08672	Up	0.119986	0.161248
CD0535	cheD	chemotaxis protein	0.305723	1.15665	Up	0.209948	0.128343
CD0536	cheW	chemotaxis protein	0.138702	1.40091	Up	0.486367	0.168164
CD0537		putative chemosensory protein	0.338485	1.0854	Down	-0.118231	0.0781919
CD0538		putative methyl accpeting chemotaxis protein	0.744697	1.05382	Down	-0.0756264	0.150261
CD0539	cheA	chemotaxis protein	0.83315	1.05741	Down	-0.0805342	0.238658
CD0540		chemotaxis protein	0.124109	1.21259	Up	0.278086	0.090769
CD0541	cheR	chemotaxis protein methyltransferase	0.588788	1.16278	Down	-0.217582	0.262681
CD0542		putative chemotaxis-related protein-glutamate methylesterase	0.118091	1.373	Down	-0.457335	0.145651
CD0543		conserved hypothetical protein	0.0245801	2.20815	Down	-1.14284	0.178163
CD0544		putative ornithine cyclodeaminase	0.599528	1.13869	Up	0.187373	0.233577
CD0545		putative lipoprotein	0.292561	1.35243	Up	0.435553	0.258367
CD0546		putative membrane protein	0.111408	1.44066	Down	-0.526725	0.162896
CD0547		putative penicillin-binding protein repressor	0.598581	1.47649	Down	-0.562168	0.698792
CD0548		putative penicillin-binding protein	0.335328	1.50503	Down	-0.58979	0.387512
CD0549		putative exported protein	0.04475	2.17952	Up	1.12401	0.230747
CD0550		putative membrane protein	0.0573809	2.13465	Down	-1.094	0.247233
CD0551	sleC	putative spore cortex-lytic enzyme pre-pro-form (putative spore peptidoglycan hydrolase)	0.240985	1.20082	Up	0.264024	0.132394
CD0552	sleB	putative spore-cortex-lytic protein	0.292773	1.11347	Up	0.155069	0.0920375
CD0553		putative methylase	0.226415	1.3116	Up	0.391333	0.181725
CD0554	sip2	singal peptidase I	0.0568623	1.3418	Up	0.424169	0.0953056
CD0556		putative endonuclease	0.747535	1.04677	Down	-0.0659482	0.132477
CD0557		putative phosphoribulokinase/uridine kinase	0.895549	1.02704	Up	0.038497	0.174154
CD0558	glsA	probable glutaminase	0.118091	1.25772	Up	0.330807	0.105351
CD0559		conserved hypothetical protein	0.533817	1.10342	Down	-0.141982	0.147794
CD0560	nfo	endonuclease IV	0.0523517	1.47291	Down	-0.558673	0.121758
CD0561		putative aldo/keto reductase	0.553978	1.06763	Up	0.0944178	0.103746
CD0562		putative endonuclease	0.469552	1.18827	Up	0.248863	0.221486
CD0563		putative iron-sulfur cluster protein	0.251083	1.31282	Down	-0.392672	0.207647
CD0564		putative ATP-binding protein	0.329213	1.57517	Down	-0.655508	0.423858
CD0565	nth	endonuclease III	0.00311873	2.27115	Down	-1.18342	0.059812
CD0566		putative RNA methylase	0.00115861	1.88176	Down	-0.912086	0.031435
CD0567		conserved hypothetical protein	0.00971802	1.65488	Down	-0.726728	0.0693402
CD0569		putative outer membrane lipoprotein	0.0668602	1.73456	Down	-0.794569	0.193826
CD0570		putative outer membrane lipoprotein	0.254382	1.22297	Up	0.290393	0.155563
CD0571		conserved hypothetical protein	0.594616	1.23902	Up	0.309205	0.379105
CD0572		conserved hypothetical protein	0.238672	1.55994	Up	0.641488	0.318209
CD0573		putative membrane protin	0.0991769	1.65159	Up	0.723856	0.21086
CD0574	thrS	threonyl-tRNA synthetase	0.163956	1.41553	Down	-0.501339	0.19084
CD0575		conserved hypothetical protein	0.713692	1.09563	Down	-0.131765	0.234843
CD0576		two-component sensor histidine kinase	0.0957087	1.47825	Up	0.563886	0.161931
CD0577		conserved hypothetical protein	0.185498	1.33632	Down	-0.418267	0.170758
CD0578		putative efflux protein	0.840138	1.36556	Up	0.449488	1.38613
CD0579		TetR-family transcriptional regulator	0.179827	1.42282	Up	0.508749	0.203402
CD0580	gapN	NADP-dependent glyceraldehyde-3-phosphate dehydrogenase	0.346954	1.16281	Up	0.217621	0.146582
CD0581		TetR-family transcriptional regulator	0.255633	1.76486	Down	-0.819551	0.441147
CD0582		putative PEP-utilising kinase	0.512999	1.6507	Down	-0.723082	0.713971
CD0583		putative signaling protein	0.0591128	2.01465	Up	1.01053	0.23324
CD0584		putative signaling protein	0.078877	2.11708	Up	1.08208	0.283497
CD0585		GntR-family transcriptional regulator	0.185115	1.52854	Down	-0.612153	0.2495
CD0586		putative phage protein	0.394717	1.60744	Down	-0.684761	0.514167
CD0587		conserved hypothetical protein	0.0483949	1.90894	Down	-0.932772	0.197587
CD0588		hypothetical protein	0.0766544	2.00885	Down	-1.00637	0.259827
CD0589		hypothetical protein	0.0622836	1.38303	Down	-0.467836	0.110721
CD0590		hypothetical protein	0.385228	1.2441	Down	-0.3151	0.231555
CD0591		putative cation transporting ATPase	0.00758565	3.0441	Down	-1.60601	0.136226
CD0592		putative membrane protein	0.0250568	3.09787	Down	-1.63128	0.257486
CD0593		hypothetical protein	0.104631	1.76263	Down	-0.817733	0.24535
CD0594		conserved hypothetical protein	0.0779475	1.69714	Down	-0.763108	0.198503
CD0595		conserved hypothetical protein	0.0457414	1.56792	Down	-0.648849	0.134777
CD0596		hypothetical protein	0.00758565	2.70415	Down	-1.43517	0.122473
CD0597	cotJB1	putative spore-coat protein	0.0360082	2.24413	Down	-1.16616	0.214567
CD0598	cotJC1	putative spore-coat protein	0.138702	2.09576	Down	-1.06747	0.371419
CD0599		transcriptional regulator (partial)	0.223267	1.16719	Up	0.223044	0.102458
CD0600		hypothetical protein	0.696295	1.18408	Up	0.243769	0.406133
CD0601	ogt1	methylated-DNA--protein-cysteine methyltransferase 1	0.44903	1.11812	Up	0.161072	0.137202
CD0602		putative plasmid-related protein	0.690115	1.11259	Up	0.15392	0.250627
CD0603		putative membrane protein	0.814253	1.07559	Down	-0.105127	0.280395
CD0604		conserved hypothetical protein	0.532564	1.11244	Down	-0.15373	0.159596
CD0605		conserved hypothetical protein	0.701873	1.08272	Down	-0.114659	0.196272
CD0606		chloride ion channel protein	0.192322	1.17438	Up	0.231895	0.0965957
CD0607	tlpB'	putative transposase-like protein B"	0.506831	1.26813	Up	0.342699	0.333466
CD0608		conserved hypothetical protein	0.262243	1.54693	Up	0.629409	0.344916
CD0609		conserved hypothetical protein	0.380266	1.1689	Up	0.22515	0.163355
CD0610		two-component sensor histidine kinase	0.0133133	3.13432	Down	-1.64815	0.199364
CD0611		two-component response regulator	0.194986	1.44326	Down	-0.529331	0.22328
CD0612		putative ABC transporter, permease protein	0.715819	1.10398	Up	0.142715	0.256753
CD0613		ABC transporter, ATP-binding protein	0.905805	1.0199	Up	0.0284264	0.143667
CD0614		conserved hypothetical protein	0.343279	1.41925	Down	-0.505125	0.337532
CD0615		TetR-family transcriptional regulator	0.291589	1.27131	Down	-0.346314	0.20488
CD0616		MerR-family transcriptional regulator	0.0119045	2.33157	Up	1.2213	0.139207
CD0617		putative membrane protein	0.0895395	2.10746	Up	1.07551	0.298862
CD0618		putative transcriptional regulator	0.106998	2.05545	Up	1.03945	0.315572
CD0619		conserved hypothetical protein	0.085821	1.70632	Down	-0.770888	0.210573
CD0620		conserved hypothetical protein	0.858025	1.07179	Up	0.100022	0.348819
CD0622		conserved hypothetical protein	0.289264	1.24719	Down	-0.318683	0.187436
CD0623		hypothetical protein	0.242714	1.19685	Up	0.259243	0.132332
CD0624		putative phage-related regulatory protein	0.245418	1.20304	Up	0.26669	0.137967
CD0625		putative phage-related regulatory protein	0.607945	1.08149	Up	0.113024	0.144197
CD0626		putative phage-related replicative helicase	0.147976	1.3178	Up	0.398128	0.143572
CD0627		putative phage positive regulator of late transcription	0.0704162	1.57983	Up	0.659765	0.164333
CD0627A		putative ferredoxin	0.506112	1.19443	Up	0.256319	0.248876
CD0628		putative membrane protein	0.758819	1.1638	Up	0.218845	0.457468
CD0629		putative transcriptional regulator	0.187941	1.73851	Up	0.797853	0.328816
CD0630		putative drug/sodium antiporter	0.578325	1.30419	Up	0.38315	0.449323
CD0631		conserved hypothetical protein	0.374716	1.13689	Up	0.185096	0.132893
CD0632		hypothetical protein	0.0565454	1.41088	Up	0.496594	0.110987
CD0633		conserved hypothetical protein	0.151004	1.16366	Up	0.218664	0.079571
CD0634		conserved hypothetical protein	0.359395	1.23708	Up	0.306934	0.212143
CD0635		conserved hypothetical protein	0.194897	1.37275	Up	0.457071	0.192172
CD0636		putative radical SAM superfamily protein	0.522441	1.17371	Up	0.231073	0.233855
CD0637		putative acetyltransferase	0.907278	1.12683	Up	0.172266	0.886161
CD0638		hypothetical protein	0.804498	1.06663	Down	-0.0930614	0.237083
CD0639		conserved hypothetical protein	0.900148	1.05611	Up	0.0787649	0.371435
CD0640		hypothetical protein	0.293542	1.31175	Up	0.391494	0.232927
CD0641		putative membrane protein	0.0179221	2.56163	Up	1.35706	0.187585
CD0642		putative transcriptional regulator	0.00575034	2.79748	Up	1.48413	0.109951
CD0643		two-component response regulator	0.0298091	1.80978	Down	-0.855812	0.144845
CD0644		two-component sensor histidine kinase	0.0870792	1.72958	Down	-0.790425	0.216996
CD0645		putative lantibiotic ABC transporter,ATP-binding protein	0.0957087	2.04995	Down	-1.03559	0.297352
CD0646		putative lantibiotic ABC transporter, permease protein	0.350082	1.58041	Down	-0.660302	0.447945
CD0647		conserved hypothetical protein (partial)	0.104742	1.70838	Down	-0.772627	0.232051
CD0648		GntR-family transcriptional regulator	0.352858	1.15926	Down	-0.213207	0.145528
CD0649		putative peptidase	0.578623	1.13534	Down	-0.183122	0.215091
CD0650		putative peptidase	0.802189	1.06612	Up	0.0923742	0.231974
CD0651		putative membrane protein	0.238672	1.17975	Down	-0.238485	0.116557
CD0652		GntR-family transcriptional regulator	0.349545	1.39478	Up	0.480039	0.325219
CD0653		ABC transporter, ATP-binding protein	0.598581	1.14648	Up	0.197214	0.244795
CD0654		putative ABC transporter, permease protein	0.953192	1.01435	Up	0.0205497	0.198199
CD0655		metallo-beta-lactamase superfamily protein	0.643687	1.25464	Up	0.327272	0.464133
CD0656		putative chloride ion channel protein	0.539978	1.24357	Down	-0.314485	0.332692
CD0657	cdu2	putative Na(+)/H(+) antiporter	0.624612	1.38458	Up	0.469453	0.627363
CD0658	cdu1	putative regulatory protein	0.779641	1.12707	Up	0.172578	0.392243
CD0659	tcdD	putative transcriptional regulator	0.346249	1.17472	Up	0.232313	0.156198
CD0660	tcdB	toxin B	0.0844525	1.50396	Down	-0.588768	0.159513
CD0661	tcdE	putative cell wall hydrolase protein	0.230683	1.1992	Up	0.262078	0.123638
CD0663	tcdA	toxin A	0.0179221	3.01142	Down	-1.59044	0.219962
CD0664	dtxA	putative exported protein	0.0369675	1.52937	Down	-0.612942	0.114136
CD0664A	cdd1	conserved hypothetical protein	0.867575	1.05104	Down	-0.071813	0.265078
CD0664B		hypothetical protein	0.862835	1.09378	Down	-0.129329	0.465444
CD0665	cdd2	putative lantibiotic ABC transporter, permease protein	0.671968	1.20184	Up	0.265248	0.408489
CD0666	cdd3	putative lantibiotic ABC transporter, peremase protein	0.786124	1.15021	Up	0.201895	0.471229
CD0667	cdd4	putative lantibiotic ABC transporter,ATP-binding protein	0.248668	1.23112	Up	0.299973	0.157075
CD0668		two-component response regulator	0.125711	1.29168	Down	-0.369245	0.121309
CD0669		two-component sensor histidine kinase	0.138702	1.53243	Down	-0.615823	0.214025
CD0670		putative regulatory protein	0.0809117	1.66893	Down	-0.738921	0.196504
CD0671		putative glyoxalase	0.162787	1.4134	Down	-0.499167	0.189344
CD0672		conserved hypothetical protein	0.0799032	1.73438	Down	-0.794424	0.20986
CD0673		conserved hypothetical protein	0.829778	1.05786	Up	0.0811494	0.235492
CD0674		putative membrane protein	0.246445	1.19142	Up	0.252685	0.131251
CD0675		putative acetyltransferase	0.121471	1.72415	Down	-0.785889	0.253842
CD0676		conserved hypothetical protein	0.951458	1.01702	Up	0.0243437	0.22426
CD0677		putative RNA polymerase sigma factor	0.154419	1.21806	Up	0.284586	0.104852
CD0678		putative transcriptional regulator	0.607184	1.17425	Up	0.231735	0.2949
CD0679		conserved hypothetical protein	0.753892	1.12284	Down	-0.167154	0.342706
CD0680		hypothetical protein	0.202964	1.17672	Down	-0.234765	0.101552
CD0681		probable transporter	0.3704	1.32408	Down	-0.404987	0.288101
CD0682		putative sodium:solute symporter	0.15525	1.4905	Down	-0.5758	0.21294
CD0683		LacI-family transcriptional regulator	0.83663	1.02473	Down	-0.0352407	0.106506
CD0684		putative ATP-dependent peptidase	0.894422	1.02399	Up	0.0341964	0.152835
CD0685	infC	translation initiation factor IF-3	0.403713	1.36282	Down	-0.4466	0.342246
CD0686	rpmI	50S ribosomal protein L35	0.449038	1.19093	Down	-0.252084	0.214787
CD0687	rplT	50S ribosomal protein L20	0.409643	1.17754	Down	-0.235777	0.18348
CD0688		conserved hypothetical protein	0.153316	1.79377	Down	-0.842994	0.309531
CD0689		putative nucleotide phosphodiesterase	0.599528	1.17139	Up	0.228222	0.284594
CD0690		putative nucleotide phosphodiesterase	0.165732	1.242	Up	0.312661	0.119765
CD0691		putative short chain dehydrogenase	0.762187	1.11788	Down	-0.160767	0.340028
CD0692		conserved hypothetical protein	0.250385	1.38849	Down	-0.473516	0.249517
CD0693		MerR-family transcriptional regulator	0.939878	1.01713	Up	0.0244994	0.18985
CD0694		TetR-family transcriptional regulator	0.249621	1.65774	Down	-0.729218	0.383417
CD0695		putative exported peptidase	0.520774	1.16359	Up	0.218578	0.220029
CD0696		probable cation transport protein	0.874882	1.03462	Down	-0.0491039	0.189697
CD0697		putative cation transport protein	0.92039	1.03331	Up	0.047279	0.281067
CD0698		putative RNA methylase	0.310822	1.60129	Down	-0.679233	0.420179
CD0699	pheS	phenylalanyl-tRNA synthetase alpha chain	0.0240752	1.38901	Up	0.474058	0.0732765
CD0700	pheT	phenylalanyl-tRNA synthetase beta chain	0.402688	1.26424	Up	0.338273	0.258633
CD0701		conserved hypothetical protein	0.39733	1.23492	Up	0.304412	0.229587
CD0702		putative membrane protein	0.384099	1.16899	Down	-0.225262	0.165008
CD0703		protease	0.0906386	1.38361	Down	-0.468435	0.131466
CD0704		putative phosphohydrolase	0.470472	1.05828	Up	0.0817153	0.0729321
CD0705		putative DNA repair protein	0.839138	1.03343	Up	0.047438	0.145169
CD0706		putative reductase	0.202353	1.84203	Up	0.8813	0.38039
CD0707		putative signaling protein	0.00808114	1.38123	Down	-0.465955	0.0406931
CD0708	pepD	putative aminoacyl-histidine dipeptidase	0.860184	1.05451	Up	0.0765677	0.270782
CD0709		putative DNA mismatch repair protein	0.0112722	2.06803	Up	1.04826	0.112885
CD0710		conserved hypothetical protein	0.307569	1.80169	Up	0.849347	0.52131
CD0711	argS	arginyl-tRNA synthetase	0.0286675	1.5267	Up	0.610416	0.101505
CD0712		hypothetical protein	0.00425003	1.78148	Down	-0.833079	0.0529889
CD0713		putative adenosylcobamide-dependent radical SAM superfamily protein	0.857785	1.09287	Down	-0.128117	0.445843
CD0714		conserved hypothetical protein	0.194986	1.20655	Down	-0.270889	0.114188
CD0714A		probable sugar O-acetyltransferase (partial)	0.480237	1.52265	Down	-0.606587	0.553367
CD0715		putative phosphate butyryltransferase	0.374753	1.22044	Up	0.2874	0.206406
CD0716	cooS	putative bifunctional carbon monoxide dehydrogenase/acetyl-CoA synthase	0.56038	1.06477	Up	0.0905422	0.101222
CD0717	cooC	putative carbon monoxide dehydrogenase accessory protein	0.0416136	1.44589	Up	0.531954	0.1036
CD0718	fhs	formate--tetrahydrofolate ligase	0.538543	1.17361	Up	0.230947	0.243273
CD0719	fchA	methenyltetrahydrofolate cyclohydrolase	0.04475	1.75092	Up	0.808115	0.165197
CD0720	folD	putative FolD bifunctional protein [includes: methylenetetrahydrofolate dehydrogenase; methenyltetrahydrofolate cyclohydrolase]	0.0173896	1.74814	Up	0.805818	0.109212
CD0721		conserved hypothetical protein	0.0027533	2.00447	Up	1.00322	0.0473283
CD0722		putative methylenetetrahydrofolate reductase	0.00425003	1.96163	Up	0.972049	0.0618372
CD0723		putative carbon monoxide dehydrogenase/acetyl-CoA synthase complex, dihydrolipoyl dehydrogenase subunit	0.0063077	2.24769	Up	1.16844	0.09169
CD0724		putative carbon monoxide dehydrogenase/acetyl-CoA synthase complex,nickel-inserting subunit	0.00368016	2.1839	Up	1.1269	0.0648663
CD0725		putative carbon monoxide dehydrogenase/acetyl-CoA synthase complex, small subunit	0.0483713	1.91177	Up	0.93491	0.197696
CD0726		putative carbon monoxide dehydrogenase/acetyl-CoA synthase complex, alpha subunit	0.0306495	1.80734	Up	0.853867	0.14644
CD0727		putative carbon monoxide dehydrogenase/acetyl-CoA synthase complex,methyltransferase subunit	0.00931214	1.95924	Up	0.970297	0.0908407
CD0728		putative carbon monoxide dehydrogenase/acetyl-CoA synthase complex, beta subunit	0.0125469	1.88188	Up	0.912174	0.106362
CD0729	gcvH	putative glycine cleavage system H protein	0.119833	1.50833	Up	0.592954	0.190529
CD0730		putative iron-sulfur protein	0.902472	1.03319	Down	-0.0471087	0.228061
CD0731		putative radical SAM superfamily protein	0.235017	1.09956	Down	-0.136929	0.0656806
CD0732		putative radical SAM superfamily protein	0.443932	1.11507	Up	0.157139	0.132267
CD0733		putative biotin/lipoate-protein ligase	0.490277	1.30566	Up	0.384781	0.360113
CD0734		conserved hypothetical protein	0.400052	1.4117	Up	0.49743	0.377753
CD0735		hypothetical protein	0.0606444	1.25681	Up	0.329771	0.077295
CD0736		hypothetical protein	0.0799032	1.53995	Up	0.622884	0.164765
CD0737	hisK	putative histidinol phosphatase	0.820872	1.09075	Down	-0.125318	0.344463
CD0738		putative exported protein	0.369192	1.13626	Up	0.184287	0.1307
CD0739		putative exported protein	0.3093	1.41712	Down	-0.502963	0.309897
CD0740		putative aminotransferase	0.310418	1.6695	Up	0.739412	0.456906
CD0741	glpK1	glycerol kinase	0.332061	1.58269	Up	0.662375	0.431906
CD0742		putative ethanolamine transporter	0.15222	2.10521	Up	1.07396	0.39293
CD0743		DeoR-family transcriptional regulator	0.0419966	2.0694	Up	1.04921	0.205533
CD0744		putative chemotaxis protein	0.624982	1.14823	Up	0.199417	0.267492
CD0745		putative chemotaxis protein	0.0259992	1.70396	Down	-0.768895	0.123571
CD0746		putative membrane protein	0.731479	1.07401	Down	-0.103012	0.195812
CD0747		putative lipoprotein	0.545195	1.08056	Down	-0.111781	0.119776
CD0748		putative signaling protein	0.553978	1.0945	Up	0.130269	0.14314
CD0749		putative ATP-dependent DNA helicase	0.991783	1.00411	Down	-0.00591416	0.292389
CD0750		amino acid ABC transporter, substrate-binding protein	0.567417	1.19924	Down	-0.262124	0.299688
CD0751		amino acid ABC transporter, permease protein	0.169733	1.72748	Down	-0.78867	0.305735
CD0752		amino acid ABC transporter, ATP-binding protein	0.323818	1.51131	Down	-0.595803	0.380041
CD0753	iscS1	putative cysteine desulfurase	0.0850292	1.31005	Down	-0.389621	0.105955
CD0754	thiI	putative thiamine biosynthesis protein	0.0675109	1.36064	Down	-0.444288	0.108906
CD0755		fimbrial protein (pilin)	0.352663	1.09238	Down	-0.127476	0.0869644
CD0756		putative reductase	0.0128353	2.3823	Up	1.25235	0.149242
CD0757		putative signaling protein	0.78671	1.04019	Down	-0.0568497	0.13311
CD0758	plfA	pyruvate formate-lyase activating enzyme	0.183484	1.25328	Up	0.325704	0.132017
CD0759	plfB	formate acetyltransferase	0.227458	1.34749	Up	0.430273	0.200531
CD0760		Ca2+/Na+ antiporter	0.458888	1.41457	Up	0.500359	0.435172
CD0761		putative ATP-dependent RNA helicase	0.0164048	2.23802	Down	-1.16223	0.154116
CD0762		putative transcription antiterminator	0.554739	1.1466	Up	0.197362	0.217402
CD0763	gutM	glucitol operon activator protein	0.215372	1.36133	Up	0.445017	0.20015
CD0764	gutA	PTS system, glucitol/sorbitol-specific IIc2 component	0.0686474	1.85885	Up	0.89441	0.220907
CD0765	srlE	PTS system, glucitol/sorbitol-specific IIb component	0.0100403	2.39969	Up	1.26285	0.125072
CD0766	srlE'	PTS system, glucitol/sorbitol-specific IIc component	0.0431082	2.35223	Up	1.23403	0.246529
CD0767	srlB	PTS system, glucitol/sorbitol-specific IIa component	0.00758565	2.86841	Up	1.52025	0.129563
CD0768	gutD	sorbitol-6-phosphate 2-dehydrogenase	0.00532508	2.97303	Up	1.57194	0.109396
CD0769		putative formate dehydrogenase	0.02461	1.46128	Up	0.547232	0.0854386
CD0770	spoIIAA	anti-sigma F factor antagonist	0.209179	1.87479	Up	0.906731	0.400178
CD0771	spoIIAB	anti-sigma F factor	0.108764	1.57391	Up	0.654354	0.200149
CD0772	sigF	RNA polymerase sigma-F factor	0.240413	1.33135	Up	0.41289	0.205885
CD0773	spoVAC	stage V sporulation protein AC	0.317946	1.38562	Up	0.470527	0.296018
CD0774	spoVAD	stage V sporulation protein AD	0.809831	1.0367	Up	0.0520036	0.135351
CD0775	spoVAE	stage V sporulation protein AE	0.290518	1.54546	Down	-0.628037	0.37057
CD0776		LacI-family transcriptional regulator	0.449808	1.16481	Up	0.220095	0.187916
CD0777		putative membrane protein	0.0815956	1.74064	Down	-0.799621	0.213831
CD0778		putative membrane protein	0.201665	1.50384	Down	-0.588651	0.253516
CD0779		putative amidohydrolase	0.988395	1.00341	Down	-0.00491424	0.182929
CD0780		conserved hypothetical protein	0.0483358	1.29135	Up	0.368879	0.0779064
CD0781		penicillin-binding protein	0.393889	1.24909	Up	0.320872	0.24039
CD0782		putative exported protein	0.242714	1.22594	Down	-0.29389	0.149515
CD0783		putative stage IV sporulation protein	0.329237	1.28142	Up	0.357743	0.231598
CD0784		putative N-acetylmuramoyl-L-alanine amidase	0.048781	1.66891	Down	-0.738909	0.156919
CD0785		ABC transporter, ATP-binding protein	0.105951	2.07684	Down	-1.05439	0.318362
CD0786		putative membrane protein	0.104616	1.82501	Down	-0.867906	0.259853
CD0787		putative metal-binding protein	0.04475	1.58223	Down	-0.661955	0.135826
CD0788		putative ATP/GTP-binding protein	0.725765	1.11141	Down	-0.152392	0.28378
CD0789		conserved hypothetical protein	0.270412	1.16429	Down	-0.219453	0.123095
CD0790		putative NUDIX-family hydrolase	0.0606444	1.46121	Up	0.547166	0.128221
CD0791		conserved hypothetical protein	0.0259788	1.57096	Up	0.65165	0.104609
CD0792		putative membrane protein	0.632094	1.20938	Up	0.274262	0.375974
CD0793		putative membrane protein	0.247572	1.18007	Up	0.238869	0.124622
CD0794	nadE	NH3-dependent NAD(+) synthetase	0.284603	1.49049	Up	0.575785	0.334959
CD0795		conserved hypothetical protein	0.104742	1.31383	Up	0.393782	0.118265
CD0796		LacI-family transcriptional regulator	0.127872	1.84747	Up	0.885551	0.292933
CD0797		putative hydroxymethylglutaryl-CoA lyase	0.314347	1.15636	Up	0.209587	0.130685
CD0798		putative membrane protein	0.366884	1.33985	Up	0.422075	0.297278
CD0799	act	putative beta-alanine CoA-transferase	0.0908131	1.80697	Up	0.853574	0.239862
CD0800	crt1	3-hydroxybutyryl-CoA dehydratase (crotonase)	0.447952	1.11782	Up	0.160684	0.136417
CD0801		probable permease	0.982222	1.00607	Up	0.00872667	0.217894
CD0802		putative CoA-transferase	0.191658	1.24017	Up	0.310541	0.12917
CD0803		putative acyl-CoA dehydrogenase	0.140936	1.35844	Up	0.441955	0.154903
CD0804		electron transfer flavoprotein beta-subunit	0.674551	1.26708	Up	0.341511	0.530254
CD0805		electron transfer flavoprotein alpha-subunit	0.252953	1.23344	Up	0.302692	0.161107
CD0806		putative sigma-54-dependent transcriptional regulator	0.844189	1.06049	Down	-0.0847371	0.267585
CD0807		hypothetical protein	0.644721	1.19459	Up	0.256518	0.365149
CD0808		putative membrane protein	0.95695	1.01991	Up	0.0284361	0.29508
CD0809		conserved hypothetical protein	0.183484	1.91176	Up	0.934902	0.378356
CD0810	floX	putative flavodoxin	0.136416	1.48863	Up	0.57399	0.196382
CD0811		putative signaling protein	0.539218	1.14322	Up	0.193109	0.203796
CD0812		putative universal stress protein	0.0581933	2.02352	Down	-1.01687	0.23193
CD0813		putative PTS system, IIb component	0.110187	1.90635	Down	-0.930811	0.286141
CD0814		GntR-family transcriptional regulator	0.92039	1.02765	Up	0.0393435	0.235236
CD0815		probable transporter	0.826882	1.09828	Down	-0.13524	0.385773
CD0816		PTS system, IIabc component	0.194315	1.36504	Down	-0.448947	0.188414
CD0817	tlpB	putative transposase-like protein B	0.506831	1.26813	Up	0.342699	0.333466
CD0818		putative 6-phospho-beta-glucosidase	0.932484	1.02918	Up	0.0414974	0.288286
CD0819		putative transcription antiterminator	0.714077	1.08626	Down	-0.119366	0.213517
CD0820		two-component response regulator	0.83663	1.08968	Down	-0.123904	0.373866
CD0821		two-component sensor histidine kinase	0.631204	1.21986	Down	-0.286719	0.391184
CD0822		putative lantibiotic ABC transporter,ATP-binding protein	0.241518	1.52816	Down	-0.611793	0.308503
CD0823			0.534659	1.41494	Down	-0.500738	0.522656
CD0824		putative lantibiotic ABC transporter, permease protein	0.440301	1.55277	Down	-0.634847	0.529944
CD0825	rbr	rubrerythrin	0.881293	1.06759	Down	-0.0943513	0.381537
CD0826		putative oxidative stress regulatory protein	0.831598	1.09005	Down	-0.124401	0.365192
CD0827	rbo	rubredoxin oxidoreductase (desulfoferrodoxin)	0.92039	1.03652	Up	0.051741	0.308175
CD0828		putative oxidative stress protein	0.789951	1.09887	Down	-0.136016	0.323683
CD0829		metallo-beta-lactamase superfamily protein	0.49874	1.07454	Down	-0.103713	0.0987652
CD0830		putative membrane protein	0.620444	1.11777	Up	0.160621	0.211846
CD0831		putative ATP-dependent RNA helicase	0.814097	1.04569	Up	0.06445	0.17167
CD0832		putative homocitrate/2-isopropylmalate synthase	0.0844525	2.06978	Down	-1.04948	0.284628
CD0833		putative aconitase/3-isopropylmalate dehydratase	0.114864	1.55332	Down	-0.635352	0.199535
CD0834		putative isocitrate/3-isopropylmalate dehydrogenase	0.478092	1.41712	Down	-0.502959	0.456659
CD0835		MarR-family transcriptional regulator	0.420137	1.70221	Up	0.767409	0.613389
CD0836		putative acetyltransferase	0.0582388	2.02527	Up	1.01811	0.23238
CD0837		putative reductase	0.123344	1.30341	Up	0.382293	0.124272
CD0838		putative DNA-binding protein	0.54546	1.38309	Up	0.467897	0.502731
CD0839		putative membrane-associated CAAX amino terminal protease	0.141545	1.25426	Up	0.326836	0.114811
CD0840		putative hydrolase	0.370584	1.15306	Down	-0.205467	0.146315
CD0841		putative formyltransferase	0.267667	1.37467	Down	-0.459081	0.255489
CD0842		conserved hypothetical protein	0.236538	1.23005	Up	0.298716	0.144
CD0843		putative glycosyl transferase	0.54546	1.22865	Up	0.297075	0.31914
CD0844	cwp25	cell surface protein	0.125401	1.56687	Down	-0.647885	0.212488
CD0845		putative nuclease	0.448001	1.1341	Up	0.181542	0.154227
CD0846		hypothetical protein	0.184711	1.27548	Down	-0.351038	0.142794
CD0847		conserved hypothetical protein	0.329237	1.14772	Up	0.198775	0.128687
CD0848		conserved hypothetical protein	0.45807	1.11208	Up	0.153266	0.132985
CD0849	abgB2	putative aminobenzoyl-glutamate utilization protein	0.229981	1.18016	Up	0.238986	0.112347
CD0850		conserved hypothetical protein	0.0907505	1.95019	Up	0.963617	0.270631
CD0851		putative membrane protein	0.322077	1.38325	Up	0.468064	0.29718
CD0852		MarR-family transcriptional regulator	0.502691	1.28522	Up	0.362018	0.348502
CD0853	oppB	oligopeptide ABC transporter, permease protein	0.100855	1.36118	Up	0.444853	0.13079
CD0854	oppC	oligopeptide ABC transporter, permease protein	0.106998	1.45778	Up	0.543772	0.164898
CD0855	oppA	oligopeptide ABC transporter, substrate-binding lipoprotein	0.00586211	1.75062	Up	0.807868	0.0616282
CD0856	oppD	oligopeptide ABC transporter, ATP-binding protein	0.0569786	1.63166	Up	0.706338	0.1591
CD0857	oppF	oligopeptide ABC transporter, ATP-binding protein (pseudogene)	0.00569786	1.61657	Up	0.706338	0.1591
CD0858		putative transcription antiterminator (pseudogene)	0.364996	1.05143	Down	-0.0723591	0.0507825
CD0860		conserved hypothetical protein	0.206503	1.33985	Up	0.422068	0.184464
CD0861		PTS system, IIb component	0.616551	1.08035	Down	-0.111504	0.14582
CD0862		PTS system, IIc component	0.243625	1.21566	Down	-0.281746	0.14428
CD0863		PTS system, IIa component	0.661835	1.10364	Up	0.142268	0.212531
CD0864		6-phospho-alpha-glucosidase	0.210861	1.11921	Up	0.162483	0.0721096
CD0865		conserved hypothetical protein	0.211063	1.09811	Down	-0.135026	0.0599606
CD0866		putative exported protein	0.969142	1.00405	Down	-0.00583198	0.0828009
CD0867		putative membrane protein	0.330739	1.24495	Down	-0.316087	0.205642
CD0868		conserved hypothetical protein	0.859325	1.05984	Down	-0.0838401	0.294396
CD0869	modA	putative molybdenum ABC transporter,substrate-binding protein	0.0627683	1.48632	Up	0.571748	0.135682
CD0870	modB	putative molybdenum ABC transporter, permease protein	0.407362	1.35871	Down	-0.442239	0.342083
CD0871	modC	putative molybdenum ABC transporter, ATP-binding protein	0.403939	1.42965	Down	-0.515658	0.395708
CD0872	maa	maltose O-acetyltransferase	0.409434	1.24928	Down	-0.321095	0.249601
CD0873		ABC transporter, substrate-binding lipoprotein	0.534659	1.69153	Down	-0.758331	0.791221
CD0874		ABC transporter, ATP-binding protein	0.640496	1.27082	Down	-0.345759	0.48672
CD0875		ABC transporter, permease protein	0.254382	1.35614	Up	0.43951	0.235422
CD0876		ABC transporter, substrate-binding lipoprotein	0.244998	2.29965	Down	-1.20142	0.619821
CD0877		ABC transporter, ATP-binding protein	0.522441	1.26145	Down	-0.335078	0.339056
CD0878		ABC transporter, permease protein	0.254382	1.35614	Up	0.43951	0.235422
CD0879		putative carbohydrate kinase	0.0100527	1.86179	Down	-0.896692	0.0902326
CD0880		putative membrane protein	0.124049	1.53754	Down	-0.620627	0.20248
CD0881		putative membrane protein	0.0253131	1.64338	Down	-0.716667	0.114053
CD0882	glgC	glucose-1-phosphate adenylyltransferase	0.0253131	1.59496	Down	-0.673524	0.107123
CD0883	glgD	glycogen biosynthesis protein	0.0421361	1.79637	Down	-0.845088	0.166971
CD0884	glgA	glycogen synthase	0.058432	1.57088	Down	-0.651576	0.149141
CD0885	glgP	glycogen phosphorylase	0.329663	1.20647	Down	-0.270791	0.17555
CD0886		putative alpha-amylase	0.838269	1.04193	Up	0.0592559	0.180555
CD0887		GntR-family transcriptional regulator	0.0437616	2.78133	Up	1.47577	0.297112
CD0888	speA	arginine decarboxylase	0.0231482	1.46807	Up	0.55392	0.083762
CD0889	speD	S-adenosylmethionine decarboxylase proenzyme	0.147799	1.49319	Up	0.578396	0.208441
CD0890	speE	spermidine synthase	0.219929	1.36048	Up	0.444114	0.201942
CD0891	speB	putative agmatinase	0.230627	1.38262	Up	0.4674	0.220335
CD0892	cspA	cold shock protein	0.0868421	2.77344	Down	-1.47168	0.40357
CD0893		iron-dependent hydrogenase	0.0582906	1.71895	Up	0.781531	0.178512
CD0894		iron-dependent hydrogenase	0.00967918	2.66659	Up	1.415	0.134081
CD0895		metallo-beta-lactamase superfamily exported protein	0.0871334	2.01191	Up	1.00857	0.277372
CD0896		putative membrane protein	0.196229	1.7092	Up	0.773321	0.327362
CD0897		conserved hypothetical protein	0.56038	1.28304	Down	-0.359566	0.402194
CD0898		conserved hypothetical protein	0.991082	1.00151	Up	0.00218345	0.100739
CD0899	dinB	DNA polymerase IV	0.220169	1.88613	Down	-0.915427	0.416744
CD0900	opuCA	glycine betaine/carnitine/choline ABC transporter, ATP-binding protein	0.0324893	1.66561	Down	-0.736054	0.129314
CD0901	opuCC	glycine betaine/carnitine/choline ABC transporter, substrate-binding protein	0.175868	2.10387	Down	-1.07305	0.424466
CD0902		putative cation efflux rotein	0.273811	2.09455	Down	-1.06664	0.604616
CD0903		putative oxidoreductase (pseudogene)	0.364996	1.05143	Down	-0.0723591	0.0507825
CD0904		phage integrase	0.289168	1.26637	Up	0.340695	0.200233
CD0905		phage protein	0.362429	1.303	Up	0.381842	0.266163
CD0906		putative phage DNA-binding protein	0.988395	1.00432	Up	0.00621686	0.234118
CD0907		putative phage regulatory protein	0.931592	1.05213	Down	-0.0733139	0.497502
CD0907A		putative phage regulatory protein	0.165059	2.23111	Up	1.15776	0.441858
CD0908		phage protein	0.238672	1.58434	Up	0.663886	0.327235
CD0909		hypothetical phage protein	0.114237	2.46007	Up	1.2987	0.406816
CD0910		putative phage protein	0.150586	1.47328	Up	0.55903	0.203041
CD0911		putative phage regulatory protein	0.123344	4.24417	Up	2.08548	0.678264
CD0912		putative phage DNA-binding protein	0.130112	3.0437	Up	1.60583	0.536276
CD0913		hypothetical phage protein	0.240985	1.20487	Up	0.268876	0.13502
CD0914		hypothetical phage protein	0.127872	1.89643	Up	0.923286	0.305543
CD0915		hypothetical phage protein	0.175704	1.95797	Up	0.969361	0.382979
CD0916		phage protein	0.175704	1.34831	Up	0.431156	0.170119
CD0917		putative phage recombination protein	0.138702	1.5195	Up	0.6036	0.209615
CD0918		phage protein	0.240411	1.18004	Up	0.238839	0.119066
CD0919		hypothetical phage protein	0.0253131	1.44173	Up	0.527797	0.083863
CD0920		hypothetical phage protein	0.713692	1.10157	Up	0.13956	0.249281
CD0921		hypothetical phage protein	0.595696	1.26099	Up	0.334552	0.41173
CD0922		hypothetical phage protein	0.810936	1.10138	Up	0.139307	0.365308
CD0923		hypothetical phage protein	0.140936	1.69841	Up	0.764185	0.267848
CD0924		hypothetical phage protein	0.0329212	1.59962	Up	0.677729	0.12001
CD0925		hypothetical phage protein	0.123344	1.58107	Up	0.660904	0.214982
CD0926		hypothetical phage protein	0.244925	1.70729	Up	0.771708	0.397878
CD0927		putative DNA methylase	0.142117	1.57676	Up	0.656967	0.23126
CD0928		hypothetical phage protein	0.485553	1.13693	Up	0.185146	0.171087
CD0929		phage protein	0.485854	1.14111	Up	0.190439	0.176214
CD0930		phage protein	0.134437	1.32248	Up	0.403251	0.137111
CD0930A		hypothetical phage protein	0.248017	1.19328	Up	0.254937	0.133226
CD0931		hypothetical phage protein	0.132753	1.37642	Up	0.46092	0.155589
CD0932		hypothetical phage protein	0.142788	2.76978	Up	1.46977	0.519416
CD0933		hypothetical phage protein	0.158692	1.88142	Up	0.911825	0.341211
CD0934		hypothetical phage protein	0.21337	1.41528	Up	0.501086	0.224179
CD0934A		phage protein	0.138702	2.10702	Up	1.0752	0.373891
CD0935		phage modification methylase	0.0898888	1.90782	Up	0.931921	0.25964
CD0936		putative phage endonuclease	0.0240752	1.61942	Up	0.695477	0.107003
CD0937		putative phage anti-repressor	0.0410726	1.82605	Up	0.868728	0.16767
CD0938		hypothetical phage protein	0.151304	1.64842	Up	0.721086	0.262913
CD0939		hypothetical phage protein	0.700899	1.16795	Up	0.223974	0.379863
CD0940		hypothetical phage protein	0.238672	1.16762	Up	0.223571	0.110585
CD0940A		hypothetical phage protein	0.152747	1.9261	Down	-0.945681	0.346636
CD0941		putative phage protein	0.10184	1.8289	Down	-0.870973	0.257261
CD0942		putative phage protein	0.973809	1.02076	Down	-0.0296379	0.495928
CD0943		putative phage DNA-binding protein	0.0960376	1.30041	Up	0.378962	0.10901
CD0944		putative phage terminase, large subunit	0.197808	1.19703	Down	-0.25946	0.110256
CD0945		phage portal protein	0.324683	1.27076	Up	0.345687	0.221081
CD0946		putative phage minor head protein	0.238672	1.20432	Up	0.268215	0.13259
CD0946A		hypothetical phage protein	0.138702	2.97844	Up	1.57456	0.547196
CD0947		putative phage scaffold protein	0.175704	1.20939	Up	0.274282	0.108434
CD0948		putative phage major capsid protein	0.848129	1.09905	Up	0.136254	0.440211
CD0949		hypothetical phage protein	0.244998	1.21031	Up	0.275372	0.142177
CD0950		hypothetical phage protein	0.561371	1.0841	Down	-0.116493	0.130965
CD0951		phage protein	0.359256	1.18403	Down	-0.243709	0.168326
CD0952		phage protein	0.115109	1.61867	Up	0.694813	0.218566
CD0953		putative phage protein	0.112998	1.80635	Up	0.853078	0.266135
CD0953A		hypothetical phage protein	0.224812	1.21796	Up	0.284465	0.13155
CD0954		phage protein	0.847329	1.05214	Down	-0.0733257	0.235659
CD0955		phage protein	0.409766	1.13733	Up	0.185653	0.144726
CD0956		phage protein	0.398498	1.09935	Up	0.136648	0.103424
CD0956A		phage protein	0.238672	1.20817	Up	0.27282	0.134314
CD0956B		hypothetical phage protein	0.296482	1.71077	Down	-0.774646	0.463852
CD0957		phage lipoprotein|putative phage lipoprotein	0.978735	1.00374	Down	-0.00538058	0.113824
CD0958		phage protein|putative phage protein	0.945302	1.0129	Up	0.0184849	0.157426
CD0959		phage membrane protein|putative phage tail tape measure protein	0.939878	1.04207	Down	-0.0594475	0.462175
CD0960		putative phage cell wall hydrolase	0.792665	1.15927	Down	-0.213215	0.513756
CD0961		putative phage cell wall hydrolase	0.670994	1.2394	Down	-0.309647	0.474861
CD0962		phage protein	0.94385	1.03337	Down	-0.0473509	0.389463
CD0963		phage protein	0.878355	1.05879	Down	-0.082411	0.327912
CD0964		putative phage tail protein|phage protein	0.564316	1.27749	Up	0.35331	0.40045
CD0965		phage protein	0.661944	1.2061	Up	0.270356	0.404683
CD0966		putative phage tail fiber protein	0.691983	1.19065	Up	0.25175	0.413015
CD0967		hypotheticalphage protein|hypothetical phage protein	0.0912859	1.55537	Up	0.637254	0.179733
CD0968		hypothetical phage protein	0.991783	1.00288	Up	0.00414453	0.216786
CD0969		hypothetical phage protein	0.676449	1.07658	Up	0.106462	0.166194
CD0970		conserved hypothetical phage protein|putative phage protein	0.826882	1.1085	Down	-0.148611	0.424968
CD0971		phage holin|putative phage membrane protein	0.95695	1.02448	Up	0.0348962	0.363974
CD0972		putative phage endolysin|phage endolysin	0.988395	1.00605	Up	0.00869785	0.326565
CD0973		hypothetical phage protein	0.938849	1.03349	Down	-0.0475223	0.360273
CD0974		hypothetical phage protein	0.269796	1.18104	Up	0.240058	0.134427
CD0975		hypothetical phage protein	0.594616	1.09907	Up	0.136281	0.167077
CD0976		hypothetical phage protein	0.314347	1.1388	Up	0.187513	0.116958
CD0977		hypothetical phage protein	0.411932	1.27672	Up	0.352437	0.275996
CD0977A		hypothetical phage protein	0.587309	1.4227	Down	-0.508636	0.611212
CD0978		putative phage regulatory protein	0.241011	1.21229	Up	0.277737	0.13973
CD0979		putative phage regulatory protein	0.241057	1.17871	Up	0.237203	0.119409
CD0981		putative membrane protein	0.250385	1.43779	Down	-0.523851	0.276417
CD0982		UbiA prenyltransferase family membrane protein	0.805108	1.11969	Down	-0.163098	0.416655
CD0983		putative hydrolase	0.196229	1.34246	Down	-0.424878	0.179861
CD0984		putative membrane protein	0.7014	1.09761	Up	0.134368	0.228264
CD0985		putative drug/sodium antiporter	0.64505	1.10923	Down	-0.149562	0.213217
CD0986		putative 30S ribosomal protein S1	0.0116643	2.14863	Up	1.10342	0.121916
CD0987		putative phosphoesterase	0.34286	1.1699	Up	0.226389	0.151059
CD0988		putative membrane protein	0.639386	1.12227	Up	0.166423	0.233446
CD0989	leuA	2-isopropylmalate synthase	0.518817	1.17506	Up	0.232733	0.232723
CD0990	leuC	3-isopropylmalate dehydratase large subunit	0.285752	1.19582	Up	0.258001	0.15063
CD0991	leuD	3-isopropylmalate dehydratase small subunit	0.158692	1.55682	Up	0.638604	0.238879
CD0992	leuB	3-isopropylmalate dehydrogenase	0.906307	1.03498	Down	-0.0495987	0.252537
CD0993		putative thioesterase	0.0912859	1.6335	Up	0.707969	0.199596
CD0994		putative aminotransferase	0.242714	1.32362	Up	0.404487	0.206319
CD0995	serA	putative D-3-phosphoglycerate dehydrogenase	0.104802	2.03268	Down	-1.02338	0.307564
CD0996		conserved hypothetical protein	0.158273	2.01242	Down	-1.00893	0.376804
CD0997		putative signaling protein	0.992585	1.00125	Down	-0.00180714	0.104408
CD0998		putative radical SAM protein	0.869566	1.0448	Up	0.0632325	0.236652
CD0999		ABC transporter, substrate-binding lipoprotein	0.852952	1.04193	Down	-0.0592546	0.198127
CD1000		ABC transporter, permease protein	0.0359411	1.35752	Down	-0.440977	0.0807965
CD1001		ABC transporter, ATP-binding protein	0.587309	1.11597	Down	-0.158304	0.190228
CD1002		putative regulatory protein	0.554985	1.18607	Up	0.246189	0.271786
CD1003	fumA	fumarate hydratase, subunit A	0.40967	1.212	Up	0.277394	0.215986
CD1004	fumB	putative fumarate hydratase, subunit B	0.110828	1.27599	Up	0.351615	0.108417
CD1005		NAD-dependent malic enzyme	0.0431082	1.43761	Up	0.52367	0.104695
CD1006		conserved acetyltransferase	0.335526	1.53051	Up	0.614009	0.403714
CD1007		conserved hypothetical protein	0.545955	1.3796	Up	0.464255	0.499801
CD1008		conserved hypothetical protein	0.329237	1.27273	Up	0.347928	0.225224
CD1009		GntR-family transcriptional regulator	0.611966	1.36909	Up	0.453221	0.584291
CD1010	nagA	N-acetylglucosamine-6-phosphate deacetylase	0.981821	1.02072	Up	0.0295807	0.717092
CD1011	glmD	glucosamine-6-phosphate deaminase	0.924624	1.08344	Down	-0.115619	0.729414
CD1012		putative membrane protein	0.187941	1.6222	Down	-0.697948	0.287946
CD1013		two-component system response regulator	0.923149	1.01488	Down	-0.0213103	0.131805
CD1014		two-component system sensor histidine kinase	0.637564	1.13697	Down	-0.185192	0.258313
CD1015		putative signaling protein	0.899803	1.03067	Up	0.0435839	0.204494
CD1016		MerR-family transcriptional regulator	0.0129529	4.01768	Up	2.00636	0.240422
CD1017		putative ABC transporter, permease/ATP-binding protein	0.812505	1.06214	Up	0.0869685	0.22948
CD1018		putative ABC transporter, permease/ATP-binding protein	0.53144	1.24881	Up	0.320552	0.331861
CD1019		conserved hypothetical protein	0.211119	1.35376	Up	0.43697	0.194165
CD1020		putative membrane protein	0.497228	1.26374	Up	0.337697	0.320494
CD1021		putative membrane protein	0.3704	1.16444	Up	0.219632	0.156208
CD1022		putative membrane protein	0.058432	1.93069	Up	0.949113	0.218148
CD1023		putative transcriptional regulator	0.187572	1.34451	Up	0.427081	0.175618
CD1024	potA	spermidine/putrescine ABC transporter,ATP-binding protein	0.238672	1.48997	Up	0.575284	0.280392
CD1025	potB	spermidine/putrescine ABC transporter, permease protein	0.298621	1.32276	Up	0.403551	0.242763
CD1026	potC	putative spermidine/putrescine ABC transporter,permease protein	0.771154	1.11785	Down	-0.160725	0.352839
CD1027	potD	spermidine/putrescine ABC transporter,substrate-binding lipoprotein	0.959019	1.02656	Up	0.0378224	0.411606
CD1028		putative signaling protein	0.729857	1.06009	Up	0.084187	0.158877
CD1029		putative cell wall anchored protein	0.210339	1.21823	Up	0.284789	0.126212
CD1030		putative glycosyl transferase	0.180655	1.56408	Up	0.645317	0.258537
CD1031		putative cell wall anchored protein	0.734745	1.04303	Down	-0.060776	0.116766
CD1032		putative exported protein	0.433365	1.18435	Down	-0.244095	0.200849
CD1033	mnaA	UDP-N-acetylglucosamine 2-epimerase	0.0230067	1.31391	Down	-0.39387	0.0592792
CD1034		putative mannosyl-glycoprotein endo-beta-N-acetylglucosamidase	0.0619952	1.13669	Up	0.18484	0.0436243
CD1035	cwp16	cell surface protein (putative N-acetylmuramoyl-L-alanine amidase)	0.0986377	1.667	Up	0.737253	0.21425
CD1036	cwp17	cell surface protein (putative N-acetylmuramoyl-L-alanine amidase)	0.0804197	1.91908	Up	0.940417	0.249486
CD1037		hypothetical protein	0.903339	1.04418	Down	-0.0623667	0.304988
CD1038		putative helicase	0.747535	1.175	Up	0.23266	0.467097
CD1039		conserved hypothetical protein	0.94385	1.05157	Up	0.0725448	0.596411
CD1040	addB	ATP-dependent nuclease subunit B	0.699475	1.07984	Down	-0.110816	0.18652
CD1041	addA	ATP-dependent nuclease subunit A	0.47093	1.11184	Down	-0.152943	0.136669
CD1042	sbcD	nuclease subunit D	0.542793	1.22092	Down	-0.287973	0.306651
CD1043	sbcC	exonuclease subunit C	0.518145	1.26594	Down	-0.340203	0.33972
CD1044		putative modulator of ions transport	0.945291	1.02633	Up	0.0374916	0.316211
CD1045		putative membrane protein	0.157481	1.82329	Down	-0.866543	0.322484
CD1046	pepT	peptidase T	0.820277	1.11332	Up	0.154868	0.423798
CD1047	cwp18	cell surface protein	0.725954	1.11813	Up	0.161091	0.300587
CD1048		putative phosphoesterase	0.0199967	1.71027	Up	0.77422	0.110922
CD1049		putative inorganic polyphosphate/ATP-NAD kinase	0.259574	1.25546	Up	0.328213	0.178793
CD1050		ABC transporter, ATP-binding protein	0.845971	1.08033	Down	-0.111468	0.355221
CD1051		putative ABC transporter, permease protein	0.238672	1.50013	Down	-0.585085	0.286095
CD1052		putative membrane protein	0.604337	1.3042	Down	-0.38316	0.483794
CD1053		putative regulatory protein	0.998705	1.00063	Down	-0.000907891	0.240529
CD1054	bcd2	butyryl-CoA dehydrogenase	0.0363008	2.83711	Up	1.50442	0.277531
CD1055	etfB2	electron transfer flavoprotein beta-subunit	0.0752484	1.7417	Up	0.800496	0.204963
CD1056	etfA2	electron transfer flavoprotein alpha-subunit	0.00971802	1.67187	Up	0.741462	0.0709233
CD1057	crt2	3-hydroxybutyryl-CoA dehydratase	0.134312	1.46553	Up	0.551427	0.187381
CD1058	hbd	3-hydroxybutyryl-CoA dehydrogenase	0.158076	1.17797	Up	0.236303	0.0881394
CD1059	thlA1	acetyl-CoA acetyltransferase	0.981676	1.00745	Up	0.0107145	0.256459
CD1060		putative pseudouridylate synthase	0.0871334	1.86521	Up	0.899341	0.247532
CD1061		conserved hypothetical protein	0.382138	1.3028	Up	0.38161	0.278296
CD1062	acpP	acyl carrier protein	0.127872	2.1205	Up	1.0844	0.358553
CD1063		putative exported protein	0.238672	1.20382	Up	0.267618	0.132545
CD1063A		conserved hypothetical protein	0.24389	1.20814	Up	0.272784	0.139873
CD1063B		hypothetical protein	0.238672	1.37085	Down	-0.455066	0.223987
CD1063C		hypothetical protein	0.343057	1.19091	Down	-0.252059	0.168332
CD1064	ccpA	LacI-family transcriptional regulator (catabolite control protein)	0.144698	1.63846	Down	-0.71234	0.253632
CD1065		hypothetical protein	0.236892	1.20189	Up	0.26531	0.128227
CD1066		hypothetical protein	0.0599895	1.3089	Up	0.388356	0.0905949
CD1067		hypothetical protein	0.383319	1.52693	Down	-0.610635	0.446553
CD1068		putative polysaccharide biosynthesis/sporulation protein	0.945167	1.02485	Down	-0.035415	0.297011
CD1069		putative phosphatase	0.615433	1.33067	Up	0.412154	0.536419
CD1070		putative aminotransferase	0.978735	1.00897	Down	-0.0128767	0.262653
CD1071		conserved hypothetical protein	0.415375	1.13991	Up	0.188924	0.149431
CD1072		putative aminopeptidase	0.106998	1.35819	Up	0.44168	0.133934
CD1073		GntR-family transcriptional regulator	0.238672	1.11472	Down	-0.156681	0.0777497
CD1074		PTS system, IIa component	0.191097	1.24894	Down	-0.320699	0.133227
CD1075		conserved hypothetical protein	0.596014	1.11984	Down	-0.163294	0.20123
CD1076		PTS system, IIb component	0.737479	1.0445	Down	-0.0628188	0.121784
CD1077		PTS system, IIc component	0.730594	1.06147	Up	0.0860622	0.162896
CD1078		PTS system, IId component	0.699475	1.10476	Up	0.143728	0.241843
CD1079		LysR-family transcriptional regulator	0.0455724	1.97549	Up	0.982212	0.203588
CD1080		putative lipoprotein	0.0119045	1.90989	Down	-0.933493	0.106272
CD1081	moeA	molybdopterin biosynthesis protein	0.479113	1.18388	Up	0.243528	0.221629
CD1082	mobB	molybdopterin-guanine dinucleotide biosynthesis protein B	0.273354	1.29427	Up	0.372138	0.210644
CD1083		PTS system, IIb component	0.854153	1.04491	Down	-0.0633723	0.214356
CD1084		ABC transporter, ATP-binding/permease protein	0.234329	1.45978	Down	-0.545752	0.260892
CD1085		putative membrane protein	0.0100527	1.77236	Down	-0.825671	0.0836851
CD1086		putative peptidase	0.0203583	1.67066	Down	-0.740415	0.106859
CD1087	zupT	zinc transporter	0.220606	2.28042	Down	-1.1893	0.541953
CD1088		putative membrane protein	0.151304	1.31616	Down	-0.396333	0.144476
CD1089	rgbR	two-component response regulator	0.924624	1.03218	Down	-0.0456965	0.287841
CD1090		two-component sensor histidine kinase (pseudogene)	0.364996	1.05143	Down	-0.0723591	0.0507825
CD1091	int	integrase	0.960317	1.01911	Down	-0.027303	0.309474
CD1092	xis	excisionase	0.388815	1.17906	Up	0.237633	0.176313
CD1092A		conjugative transposon protein	0.156635	1.71862	Up	0.781249	0.290058
CD1094		conjugative transposon protein	0.161461	1.72139	Up	0.78357	0.295768
CD1095		putative lantibiotic ABC transporter, permease protein	0.1728	1.51862	Down	-0.60276	0.235801
CD1096		putative lantibiotic ABC transporter, permease protein	0.249634	1.46275	Down	-0.548679	0.288625
CD1097		putative lantibiotic ABC transporter,ATP-binding protein	0.194986	1.40345	Down	-0.488975	0.206059
CD1098		two-component sensor histidine kinase	0.0854851	1.42274	Up	0.508671	0.138748
CD1099		two-component response regulator	0.282188	1.42999	Up	0.516002	0.298002
CD1099A		hypothetical protein	0.242714	1.53045	Up	0.613953	0.313349
CD1100		putative conjugative transposon protein	0.138231	1.3861	Up	0.471035	0.162207
CD1101		putative mobilization protein	0.579678	1.17931	Up	0.237939	0.280487
CD1102		putative mobilization protein	0.240849	1.20038	Up	0.263488	0.131589
CD1103		conserved hypothetical protein	0.329333	1.31502	Up	0.395086	0.255878
CD1103A		hypothetical protein	0.489466	1.34204	Up	0.424432	0.395977
CD1104		conserved hypothetical protein	0.12897	1.51933	Up	0.603435	0.20048
CD1104A		hypothetical protein	0.43202	1.27823	Up	0.354152	0.290426
CD1104B		hypothetical protein	0.235624	1.149	Up	0.200383	0.096354
CD1105		putative DNA primase	0.573951	1.09623	Up	0.132546	0.153997
CD1106		DNA topoisomerase	0.163956	1.25698	Up	0.32996	0.125573
CD1106A		conserved hypothetical protein	0.67387	1.09948	Up	0.136819	0.212033
CD1107		putative membrane protein	0.199673	1.51472	Up	0.599047	0.256215
CD1107A		conserved hypothetical protein	0.158692	1.40105	Up	0.486507	0.182059
CD1108		putative DNA-repair protein	0.637528	1.06508	Up	0.0909682	0.126825
CD1109		modification DNA methylase	0.212681	1.7813	Up	0.832933	0.371768
CD1110		putative conjugal transfer protein	0.0443937	1.33005	Up	0.411486	0.0838525
CD1111		putative membrane protein	0.968421	1.01596	Down	-0.0228409	0.312263
CD1112		putative membrane protein	0.409766	1.45912	Up	0.545103	0.424712
CD1113		putative conjugative transfer protein	0.264643	1.64407	Up	0.717268	0.395864
CD1114		hypothetical protein	0.867746	1.05186	Up	0.072947	0.269791
CD1115		putative conjugal transfer protein	0.422009	1.12827	Down	-0.174118	0.139787
CD1116		conserved hypothetical protein	0.932164	1.01846	Down	-0.0263905	0.182405
CD1117		conserved hypothetical protein	0.407362	1.59031	Up	0.669312	0.517667
CD1118		conserved hypothetical protein	0.207712	1.17635	Up	0.23432	0.102876
CD1119		putative lipoprotein	0.323326	1.34381	Up	0.426325	0.271454
CD1120	dhaB1	glycerol dehydratase	0.407102	1.50474	Down	-0.589518	0.455123
CD1121	dhaB2	glycerol dehydratase activator	0.520774	1.3244	Down	-0.405335	0.408103
CD1122		putative transcriptional regulator	0.829778	1.05545	Up	0.0778629	0.226024
CD1123		putative phosphoesterase	0.222188	1.16086	Up	0.215193	0.0985999
CD1124		hypothetical protein	0.160695	1.28076	Up	0.357004	0.134476
CD1124A		hypothetical protein	0.511684	1.2034	Down	-0.267114	0.262957
CD1125		nitroreductase-family protein	0.0632933	2.11164	Down	-1.07837	0.257059
CD1126		AraC-family transcriptional regulator	0.0126504	3.15877	Down	-1.65936	0.194502
CD1126A		putative transcriptional regulator	0.425402	1.33805	Up	0.420136	0.339714
CD1127		putative membrane protein	0.361204	1.39379	Up	0.479009	0.332708
CD1128	polA	DNA polymerase I	0.057804	1.42443	Up	0.510387	0.116142
CD1129	coaE	putative dephospho-CoA kinase	0.0649615	1.50842	Up	0.593037	0.14296
CD1130		putative transglycosylase	0.058432	1.77574	Up	0.828423	0.18951
CD1131		putative solute-binding lipoprotein	0.0371231	1.41172	Up	0.497452	0.092909
CD1132		putative heavy-metal binding protein	0.750926	1.19439	Down	-0.256278	0.520047
CD1133		hypothetical protein	0.883785	1.07316	Down	-0.101866	0.419401
CD1134	gloA	lactoylglutathione lyase	0.318819	1.21961	Up	0.286422	0.180478
CD1135		putative cell wall hydrolase	0.526504	1.20117	Up	0.264437	0.27005
CD1136		putative membrane protein	0.6084	1.17246	Up	0.229543	0.293653
CD1137	rnfC	electron transport complex protein	0.211831	1.17479	Up	0.232405	0.103527
CD1138	rnfD	electron transport complex protein	0.803922	1.05858	Up	0.082133	0.208053
CD1139	rnfG	electron transport complex protein	0.961758	1.01042	Up	0.0149622	0.177344
CD1140	rnfE	electron transport complex protein	0.890529	1.04055	Down	-0.0573446	0.24974
CD1141	rnfA	electron transport complex protein	0.663354	1.14721	Down	-0.198129	0.297696
CD1142	rnfB	electron transport complex protein	0.65238	1.17599	Down	-0.233872	0.340203
CD1142A		hypothetical protein	0.789616	1.21292	Down	-0.278481	0.661087
CD1143	maf	septum formation protein	0.247205	1.16025	Up	0.214432	0.111753
CD1144	radC	DNA repair protein	0.355032	1.10436	Up	0.143213	0.0981448
CD1145	mreB2	rod shape-determining protein	0.0173896	1.4821	Up	0.567647	0.0772391
CD1146	mreC	putative rod shape-determining protein	0.0421361	1.38082	Up	0.465524	0.0915759
CD1147		putative membrane protein	0.143128	1.30254	Up	0.381327	0.134997
CD1148		putative penicillin-binding protein	0.277895	1.30707	Up	0.386334	0.221188
CD1149	minC	septum site-determining protein	0.286302	1.20704	Up	0.271479	0.158686
CD1150	divIVB	septum site-determining protein (cell division inhibitor)	0.489466	1.12178	Up	0.165784	0.154633
CD1151	minE	cell division topological specificity factor	0.56228	1.1346	Up	0.182188	0.205207
CD1152	mrdB	rod shape-determining protein	0.262748	1.12329	Up	0.167735	0.0921256
CD1153	mgsA	methylglyoxal synthase	0.429635	1.16338	Up	0.218326	0.178205
CD1154		PadR-family transcriptional regulator	0.564557	1.08938	Up	0.123514	0.140145
CD1155		putative membrane protein	0.0567041	2.58139	Down	-1.36815	0.30668
CD1156		putative exported protein	0.36883	1.26901	Down	-0.3437	0.243359
CD1157	norV	putative anaerobic nitric oxide reductase flavorubredoxin	0.0762451	1.51278	Down	-0.5972	0.153826
CD1158		radical SAM-superfamily protein	0.171204	1.19693	Down	-0.259334	0.100976
CD1159		conserved hypothetical protein	0.645799	1.05941	Up	0.083259	0.118922
CD1160	cafA	ribonuclease g	0.240985	1.11329	Up	0.154826	0.0777574
CD1161	rplU	50S ribosomal protein L21	0.242714	1.39083	Up	0.475951	0.241923
CD1162		conserved hypothetical protein	0.224812	1.3187	Up	0.399115	0.184538
CD1163	rpmA	50S ribosomal protein L27	0.226415	1.38373	Up	0.468561	0.217646
CD1164	obg	Spo0B-associated GTP-binding protein	0.175704	1.9183	Down	-0.939825	0.370918
CD1165		conserved hypothetical protein	0.147019	1.86201	Down	-0.896857	0.322325
CD1166	hom1	homoserine dehydrogenase	0.0422233	2.16634	Down	-1.11526	0.220947
CD1167		putative integrase/recombinase	0.900871	1.04026	Up	0.0569505	0.271267
CD1168		putative membrane protein	0.701814	1.10958	Up	0.150019	0.256511
CD1169		GntR-family transcriptional regulator	0.766292	1.08406	Up	0.116441	0.250034
CD1170		conserved hypothetical protein	0.118091	1.37937	Up	0.464008	0.147707
CD1171	etfB3	electron transfer flavoprotein beta-subunit	0.0483358	1.48759	Up	0.572972	0.121036
CD1172	etfA3	electron transfer flavoprotein alpha-subunit	0.327951	1.15782	Up	0.211416	0.136244
CD1173		putative FAD/FMN-containing dehydrogenase	0.737545	1.12235	Up	0.166521	0.323133
CD1174		conserved hypothetical protein	0.267881	1.14248	Down	-0.192169	0.107033
CD1175	ackA	acetate kinase	0.579767	1.09556	Up	0.131667	0.1554
CD1176		conserved hypothetical protein	0.0950885	1.53056	Down	-0.61406	0.175764
CD1176A	rpmF	50S ribosomal protein L32	0.298621	1.26007	Down	-0.333509	0.200651
CD1177	fapR	DeoR-family transcriptional regulator (fatty acid and phospholipid biosynthesis regulator)	0.456596	1.56499	Down	-0.646157	0.559082
CD1178	plsX	fatty acid/phospholipid synthesis protein	0.445887	1.69087	Down	-0.757763	0.640765
CD1179	fabH	3-oxoacyl-[acyl-carrier-protein] synthase III	0.477156	1.55813	Down	-0.639815	0.579247
CD1180	fabK	trans-2-enoyl-ACP reductase	0.450014	1.41723	Down	-0.503072	0.429867
CD1181	fabD	malonyl CoA-acyl carrier protein transacylase	0.499331	1.27602	Down	-0.351653	0.335678
CD1182	fabG	3-oxoacyl-[acyl-carrier protein] reductase	0.349503	1.4192	Down	-0.505074	0.342009
CD1183	acpP	acyl carrier protein	0.127872	2.1205	Up	1.0844	0.358553
CD1184	fabF	3-oxoacyl-[acyl-carrier-protein] synthase II	0.926163	1.02044	Down	-0.0291928	0.187644
CD1185		putative signaling protein	0.503793	1.48478	Down	-0.570251	0.550574
CD1186		putative sigma-54 dependent transcriptional regulator	0.246669	1.74862	Down	-0.806216	0.419601
CD1187		conserved hypothetical protein	0.560825	1.09764	Up	0.134405	0.15086
CD1188		putative glutamine amidotransferase	0.713692	1.08153	Up	0.113075	0.201823
CD1189		putative amino acid permease	0.078877	1.95468	Down	-0.966931	0.253418
CD1190		putative acetyltransferase	0.731479	1.09617	Up	0.132473	0.251863
CD1191	fbp	putative fructose-1,6-bisphosphatase	0.0750954	1.15261	Up	0.20491	0.0523913
CD1192	spoIIIAA	stage III sporulation protein AA	0.969142	1.01451	Up	0.0207819	0.297604
CD1193	spoIIIAB	stage III sporulation protein AB	0.187572	1.24327	Up	0.314136	0.129152
CD1194	spoIIIAC	stage III sporulation protein AC	0.238672	1.20522	Up	0.269293	0.132595
CD1195	spoIIIAD	stage III sporulation protein AD	0.111408	2.14328	Down	-1.09982	0.340319
CD1196	spoIIIAE	stage III sporulation-related protein	0.600784	1.1114	Up	0.152382	0.190798
CD1197	spoiIIIAF	putative stage III sporulation protein AF	0.80152	1.06518	Up	0.0910925	0.227649
CD1198	spoIIIAG	stage III sporulation protein AG	0.241906	1.20754	Up	0.272071	0.137436
CD1199	spoIIIAH	putative stage III sporulation protein AH	0.238342	1.22816	Up	0.296501	0.143851
CD1200		conserved hypothetical protein	0.479113	1.20892	Up	0.273717	0.249126
CD1201	nusB	N utilization substance protein B	0.173143	1.47648	Down	-0.562166	0.220187
CD1202	gcp	probable O-sialoglycoprotein endopeptidase	0.125711	1.39915	Down	-0.484547	0.159116
CD1203	xseA	exodeoxyribonuclease VII large subunit	0.0207683	1.88619	Down	-0.915474	0.133162
CD1204	xseB	exodeoxyribonuclease VII small subunit	0.0381818	1.73978	Down	-0.798906	0.150535
CD1205	ispA	geranyltranstransferase	0.0910414	1.57335	Up	0.653837	0.184
CD1206		putative membrane protein	0.227458	1.30747	Up	0.386774	0.180381
CD1207	dxs	1-deoxy-D-xylulose 5-phosphate synthase	0.613638	1.08831	Down	-0.122088	0.158126
CD1208		putative RNA methyltransferase	0.0777704	1.52428	Down	-0.608124	0.157944
CD1209	recN	DNA repair protein	0.111408	1.25755	Down	-0.33062	0.102307
CD1210		putative exported protein	0.368814	1.26399	Up	0.337981	0.239152
CD1211		putative acetyltransferase	0.491356	1.15917	Up	0.213098	0.199933
CD1212	bltD	spermine/spermidine acetyltransferase	0.224668	1.28954	Up	0.366861	0.169437
CD1213	spoIVB	stage IV sporulation protein B	0.304114	1.2192	Up	0.285929	0.174274
CD1214	spo0A	stage 0 sporulation protein A	0.0963079	1.33482	Up	0.416641	0.120096
CD1215		putative pyrophosphokinase	0.0675109	1.58625	Up	0.665616	0.163175
CD1216		putative exported protein	0.0138602	1.67985	Up	0.748333	0.0940319
CD1217		putative glycosyltransferase	0.0455132	1.75282	Up	0.809677	0.167632
CD1218		putative glycosyltransferase	0.255614	1.34624	Up	0.428939	0.230829
CD1219		conserved hypothetical protein	0.125401	1.36783	Up	0.45189	0.148205
CD1220	nudF	ADP-ribose pyrophosphatase	0.0841898	1.66767	Up	0.73783	0.199259
CD1221		putative membrane protein	0.02516	1.96488	Up	0.974443	0.154103
CD1222	xerD1	putative tyrosine recombinase	0.134312	1.34363	Up	0.426131	0.144797
CD1223	deoB	phosphopentomutase	0.0898888	1.34746	Up	0.430241	0.119842
CD1224	deoD	purine nucleoside phosphorylase	0.063878	1.45851	Up	0.544498	0.130277
CD1225	deoA	pyrimidine-nucleoside phosphorylase	0.361575	1.13726	Up	0.185565	0.129087
CD1226		putative exported aminodeoxychorismate lyase	0.114981	1.37021	Up	0.454393	0.142795
CD1227		putative O-methyltransferase	0.579524	1.13519	Down	-0.182934	0.215412
CD1228		putative protease	0.516825	1.08667	Down	-0.11992	0.119441
CD1229		putative penicillin-binding protein	0.171273	1.58627	Down	-0.665639	0.259286
CD1230	sigK	sigma K	0.00879442	1.81653	Up	0.861186	0.0778666
CD1231		site-specific recombinase	0.0460427	1.95528	Up	0.967372	0.201684
CD1232		putative lipoprotein	0.138231	1.58213	Up	0.661868	0.228037
CD1233	cwp26	cell surface protein	0.991783	1.00831	Up	0.0119358	0.59911
CD1233A		hypothetical protein	0.81252	1.12498	Down	-0.169898	0.449775
CD1234		hypothetical protein	0.213488	1.19459	Up	0.256516	0.114888
CD1235		putative exported protein	0.564316	1.32303	Down	-0.403844	0.457851
CD1236		putative exported protein	0.236892	1.20934	Up	0.274222	0.132535
CD1237		hypothetical protein (fragment)	0.364996	1.05143	Down	-0.0723591	0.0507825
CD1238		putative membrane protein	0.594616	1.18161	Up	0.240758	0.29512
CD1239		putative regulatory protein	0.973097	1.01721	Up	0.0246126	0.396776
CD1240	vanZ	putative teicoplanin resistance protein	0.244925	1.29256	Up	0.370227	0.19082
CD1240A		putative phage-related DNA-directed RNA polymerase 7 kDa polypeptide	0.165706	1.97469	Down	-0.98163	0.375582
CD1242		putative membrane protein	0.151004	1.25763	Up	0.330705	0.120288
CD1243		putative membrane protein	0.321527	1.17335	Up	0.230631	0.146169
CD1244		putative membrane protein	0.586236	1.10949	Up	0.149896	0.17945
CD1245		putative membrane protein	0.345187	1.1122	Up	0.153421	0.102939
CD1246	efp	elongation factor P	0.032457	1.47982	Up	0.565422	0.0991496
CD1247		conserved hypothetical protein	0.624612	1.11584	Up	0.158125	0.21116
CD1248	rnc	putative ribonuclease III	0.145533	1.22509	Down	-0.292882	0.104773
CD1249		radical SAM-superfamily protein	0.553978	1.01834	Up	0.0262186	0.0287808
CD1250	smc	chromosome partition protein	0.930079	1.04692	Up	0.0661468	0.442114
CD1251	ftsY	putative signal recognition particle	0.0752484	1.24784	Up	0.319438	0.0818968
CD1251A		conserved hypothetical protein	0.506831	1.22632	Down	-0.29433	0.286294
CD1252	ffh	signal recognition particle protein	0.401036	1.09831	Down	-0.135286	0.103017
CD1253	rpsP	30S ribosomal protein S16	0.82197	1.0756	Up	0.105146	0.290813
CD1254		conserved hypothetical protein	0.692998	1.08929	Up	0.123391	0.203293
CD1255	rimM	putative 16S rRNA processing protein	0.634479	1.23686	Down	-0.30668	0.424335
CD1256	trmD	tRNA (Guanine-n(1)-)-methyltransferase	0.447952	1.33961	Down	-0.421818	0.358173
CD1257	rplS	50S ribosomal protein L19	0.656449	1.22522	Up	0.293044	0.431472
CD1258		putative GTPase	0.0789308	1.35741	Down	-0.440855	0.11566
CD1259		branched-chain amino acid transport system carrier protein	0.181642	1.46869	Down	-0.554525	0.222938
CD1260		branched chain amino acid transport system carrier protein	0.690623	1.04923	Down	-0.0693374	0.113137
CD1261		putative ribonucleotide-diphosphate reductase	0.961758	1.01384	Down	-0.0198277	0.233863
CD1262	rnhB	ribonuclease HII	0.656449	1.15427	Up	0.206986	0.304763
CD1263		putative FMN-dependent dehydrogenase	0.220944	1.70888	Up	0.773047	0.352651
CD1264		hypothetical protein	0.905637	1.05591	Up	0.0784884	0.393341
CD1265		putative regulatory protein	0.00643938	4.48171	Down	-2.16405	0.172108
CD1266		putative ABC transporter, permease protein	0.637899	1.19608	Down	-0.258313	0.360694
CD1267		putative ABC transporter, permease protein	0.0731201	1.97395	Down	-0.981088	0.24771
CD1268		ABC transporter, ATP-binding protein	0.272604	1.20298	Down	-0.266618	0.150424
CD1269		two-component response regulator	0.978735	1.02433	Down	-0.0346816	0.729526
CD1270		two-component sensor histidine kinase	0.238672	1.47969	Down	-0.56529	0.277587
CD1271		conserved hypothetical protein	0.238672	1.20171	Up	0.265084	0.131552
CD1272		putative competence protein (putative magnesium chelatase)	0.222188	1.19949	Up	0.262424	0.12022
CD1273		putative competence protein	0.20888	1.52608	Down	-0.609835	0.268887
CD1274	topA	DNA topoisomerase I	0.250385	1.77674	Down	-0.829229	0.437548
CD1275	codY	GTP-sensing transcriptional pleiotropic repressor	0.417389	1.42907	Down	-0.515079	0.409451
CD1276		putative ATPase	0.86136	1.10225	Down	-0.140451	0.500447
CD1277		putative acetyltransferase	0.683352	1.17494	Down	-0.232584	0.37124
CD1278		RRF2-family transcriptional regulator	0.960141	1.02301	Down	-0.0328229	0.364236
CD1279	iscS2	cysteine desulfurase	0.0262831	2.08455	Down	-1.05973	0.171864
CD1280		NifU-like protein	0.458831	1.28125	Down	-0.357551	0.310692
CD1281	trmU	putative tRNA (5-methylaminomethyl-2-thiouridylate)-methyltransferase	0.62288	1.10251	Up	0.140791	0.187193
CD1282	alaS	putative alanyl-tRNA synthetase	0.244925	1.08458	Up	0.117137	0.0603903
CD1283		conserved hypothetical protein	0.338485	1.12885	Up	0.174857	0.115661
CD1284		putative membrane protein	0.312632	1.18045	Up	0.23934	0.148646
CD1285		putative holliday junction resolvase	0.293072	1.44569	Down	-0.531756	0.315833
CD1286		conserved hypothetical protein	0.236892	1.55838	Up	0.640047	0.309032
CD1287	fur	ferric uptake regulation protein	0.0128353	2.7407	Down	-1.45455	0.172116
CD1288		putative membrane-bound metal-dependent hydrolase	0.138702	1.72469	Down	-0.786339	0.271942
CD1289		metallo beta-lactamase superfamily protein	0.0573809	1.66616	Down	-0.736531	0.166705
CD1290		putative small acid-soluble spore protein	0.241518	1.20011	Up	0.263164	0.13266
CD1291	dacF	D-alanyl-D-alanine carboxypeptidase (penicillin-binding protein)	0.099929	1.96372	Down	-0.973589	0.285102
CD1292		conserved hypothetical protein	0.0240752	1.80235	Up	0.84988	0.131384
CD1293		AraC-family transcriptional regulator	0.0135662	1.93521	Up	0.952487	0.117643
CD1294		putative membrane-associated peptidase	0.999854	1.00009	Down	-0.000132722	0.159697
CD1295	scpA	segregation and condensation protein A	0.78974	1.07446	Up	0.10361	0.24623
CD1296	scpB	segregation and condensation protein B	0.23953	1.48677	Down	-0.572186	0.284699
CD1297		putative membrane protein	0.204162	1.1217	Up	0.165687	0.0720101
CD1298		conserved hypothetical protein	0.800535	1.04048	Up	0.0572423	0.142236
CD1299		MarR-family transcriptional regulator	0.138702	1.64343	Up	0.716707	0.249115
CD1300	pepA	putative cytosol aminopeptidase	0.0169345	1.79217	Up	0.841708	0.112856
CD1301		putative membrane protein	0.398746	1.17689	Up	0.234983	0.17804
CD1301A		hypothetical protein	0.019836	2.63486	Up	1.39773	0.199609
CD1302		putative pyrophosphohydrolase	0.461174	1.36866	Up	0.45276	0.395586
CD1303		putative NAD-dependent deacetylase (Sir2-family regulatory)	0.468668	1.37598	Up	0.460458	0.40882
CD1304	acd	putative mannosyl-glycoprotein endo-beta-N-acetylglucosamidase	0.0746441	1.51023	Up	0.594772	0.151704
CD1305	dnaF	DNA polymerase III PolC-type	0.804498	1.02481	Down	-0.035351	0.0900293
CD1306		conserved hypothetical protein	0.0597438	2.25986	Down	-1.17623	0.273282
CD1307	nusA	transcription elongation protein	0.0536627	1.47429	Down	-0.560024	0.122984
CD1307A		conserved hypothetical protein	0.198048	1.37507	Down	-0.459503	0.195538
CD1308		putative ribosomal protein	0.237877	1.45792	Down	-0.543917	0.263432
CD1309	infB	translation initiation factor IF-2	0.262258	1.27428	Down	-0.349683	0.191763
CD1310	rbfA	ribosome-binding factor A	0.657472	1.11571	Down	-0.157956	0.233565
CD1311		putative RNA-binding protein	0.0987928	1.40938	Down	-0.495063	0.143984
CD1312	tlpB	transposase-like protein B"	0.506831	1.26813	Up	0.342699	0.333466
CD1314	truB	tRNA pseudouridine synthase B	0.266007	1.43065	Down	-0.516669	0.286114
CD1315	ribC	riboflavin biosynthesis protein	0.032457	1.46084	Up	0.5468	0.0958358
CD1315A		hypothetical protein	0.203871	1.24798	Up	0.319594	0.138772
CD1316	rpsO	30S ribosomal protein S15	0.620444	1.18369	Up	0.24329	0.320987
CD1317		conserved hypothetical protein	0.685605	1.09032	Down	-0.124755	0.200479
CD1318	comR	polyribonucleotide nucleotidyltransferase	0.158273	1.18584	Up	0.245913	0.0918394
CD1319		putative polysaccharide deacetylase	0.231388	1.25361	Up	0.326092	0.154476
CD1320		putative peptidase	0.454755	1.07238	Down	-0.100817	0.0868531
CD1321		conserved hypothetical protein	0.553181	1.15249	Down	-0.204753	0.224013
CD1322	dapG	aspartokinase	0.67382	1.13511	Down	-0.182826	0.283171
CD1323	tepA	translocation-enhancing protein TepA	0.359722	1.22028	Down	-0.287209	0.1988
CD1324	ftsK	putative DNA translocase	0.416421	1.20897	Down	-0.273774	0.217152
CD1325		putative ATP/GTP binding protein	0.908068	1.03431	Down	-0.0486696	0.254613
CD1326		radical SAM-superfamily protein	0.873812	1.06985	Down	-0.0974097	0.373453
CD1327	pgsA	CDP-diacylglycerol--glycerol-3-phosphate 3-phosphatidyltransferase	0.81252	1.02998	Down	-0.0426219	0.112812
CD1328	recA	RecA protein (recombinase A)	0.554739	1.16431	Down	-0.219475	0.24183
CD1329		putative nucleic acid-binding protein	0.684007	1.09904	Down	-0.136238	0.21797
CD1330		conserved hypothetical protein	0.312922	1.13769	Up	0.18611	0.115693
CD1331	sip3	signal peptidase I	0.185574	1.38141	Up	0.466142	0.190488
CD1332	bacA1	undecaprenyl-diphosphatase	0.246027	1.3062	Up	0.38538	0.199701
CD1333	xerD2	putative tyrosine recombinase	0.238672	1.36445	Down	-0.448314	0.222417
CD1334		adenylosuccinate lyase	0.0741341	1.36815	Up	0.452225	0.115094
CD1335		MarR-family transcriptional regulator	0.632094	1.14732	Down	-0.198273	0.272032
CD1336	malX	PTS system, maltose and glucose-specific IIbc component	0.18739	1.59471	Down	-0.67329	0.27645
CD1337		RpiR-family transcriptional regulator	0.285463	1.28157	Down	-0.357913	0.208786
CD1338	glvG	maltose-6'-phosphate glucosidase	0.62484	1.03002	Down	-0.0426669	0.0571661
CD1339		aspartate aminotransferase	0.847329	1.03353	Down	-0.0475804	0.15278
CD1340		putative galactose-1-phosphate uridylyltransferase	0.699475	1.0548	Down	-0.0769665	0.129791
CD1341	exoA	putative exodeoxyribonuclease	0.725765	1.02668	Down	-0.0379926	0.0707414
CD1342		putative exonuclease	0.16592	1.57919	Down	-0.659187	0.252724
CD1343	glnA	glutamine synthetase	0.0902645	1.20439	Up	0.268306	0.074935
CD1344		putative cell wall biosynthesis protein	0.0573809	1.87973	Down	-0.910526	0.205579
CD1345		PadR-family transcriptional regulator	0.0565901	1.68819	Down	-0.755477	0.169014
CD1346		putative membrane protein	0.993193	1.00318	Up	0.00458653	0.283648
CD1347		putative exported protein	0.985869	1.01322	Up	0.0189532	0.581758
CD1348		putative lipoprotein	0.101491	1.67598	Down	-0.745004	0.219655
CD1349		putative lantibiotic ABC transporter,ATP-binding protein	0.058432	1.68039	Down	-0.7488	0.172031
CD1350		putative lantibiotic ABC transporter, permease protein	0.589966	1.20542	Down	-0.26954	0.326324
CD1351		putative lantibiotic ABC transporter, permease protein	0.597927	1.17954	Up	0.23823	0.295123
CD1352		lantibiotic two-component sensor histidine kinase	0.206871	1.49832	Down	-0.583342	0.255468
CD1353		putative pyridoxine kinase	0.364508	1.33355	Down	-0.415275	0.291089
CD1354		putative exported protein	0.0591128	1.63836	Down	-0.712249	0.164483
CD1355	cspB	putative cold shock protein	0.204766	1.61075	Down	-0.687729	0.299378
CD1356		putative regulatory protein	0.0708808	1.89182	Down	-0.919772	0.229996
CD1357		putative peptidyl-prolyl isomerase	0.549646	1.10275	Down	-0.141108	0.153271
CD1358		putative membrane protein	0.82197	1.07072	Down	-0.0985807	0.27272
CD1359		putative phage-related protein	0.355902	1.51855	Down	-0.602698	0.413877
CD1360		putative phage repressor	0.646399	1.09705	Up	0.133633	0.191261
CD1360A		putative phage regulatory protein	0.138702	1.29326	Up	0.371011	0.128681
CD1361		conserved hypothetical protein	0.146581	1.27585	Up	0.351456	0.12611
CD1362		hypothetical protein	0.978678	1.00743	Up	0.0106789	0.211813
CD1363		putative phage protein	0.273594	1.18618	Up	0.246329	0.139549
CD1364		putative phage protein	0.970922	1.01124	Down	-0.0161213	0.247337
CD1365		conserved hypothetical protein	0.249634	1.10301	Down	-0.14144	0.0744042
CD1365A		hypothetical protein	0.458859	1.05859	Up	0.0821453	0.0714204
CD1366		putative phage protein	0.21337	1.25058	Up	0.322596	0.144371
CD1367		putative phage protein	0.276859	1.3695	Up	0.453648	0.259178
CD1368		putative phage cell wall hydrolase	0.333001	1.18928	Up	0.25009	0.163463
CD1369		hypothetical protein	0.256827	1.20547	Up	0.269592	0.145567
CD1370		phage protein	0.193069	1.23416	Up	0.303531	0.126741
CD1371		phage protein	0.854153	1.03474	Up	0.0492726	0.166372
CD1372		phage protein	0.175704	1.23861	Up	0.30872	0.121986
CD1373		putative phage tail fiber protein	0.232256	1.16826	Up	0.224364	0.106591
CD1374		putative phage protein	0.900871	1.01945	Down	-0.0277844	0.132507
CD1375		putative phage-related protein	0.507719	1.25788	Up	0.330999	0.323
CD1376		putative membrane protein	0.211168	1.19958	Up	0.262527	0.116693
CD1377		putative membrane protein	0.638786	1.08884	Down	-0.122798	0.171907
CD1378		putative phage regulatory protein	0.778589	1.17446	Up	0.231999	0.52511
CD1378A		putative phage regulatory protein	0.548487	1.10109	Up	0.138932	0.150469
CD1378B		hypothetical protein	0.514521	1.41161	Down	-0.49734	0.492715
CD1379		putative phage regulatory protein	0.707622	1.12113	Up	0.164957	0.287164
CD1380		putative transporter	0.032457	1.45378	Down	-0.539813	0.094577
CD1381		TetR-family transcriptional regulator	0.854153	1.03267	Down	-0.0463859	0.157281
CD1382	glpK2	glycerol kinase	0.176469	1.16876	Up	0.22498	0.089145
CD1383		GntR-family transcriptional regulator	0.92011	1.02638	Down	-0.0375688	0.221317
CD1384		conserved hypothetical protein	0.0100527	1.85208	Down	-0.889143	0.0905741
CD1385		probable transporter	0.155492	2.22676	Down	-1.15495	0.427577
CD1386		putative allophanate hydrolase subunit 1	0.16315	2.29005	Down	-1.19538	0.453881
CD1387		putative allophanate hydrolase subunit 2	0.234329	1.6725	Down	-0.742005	0.354666
CD1388		putative transcriptional regulator (pseudogene)	0.364996	1.05143	Down	-0.0723591	0.0507825
CD1389		putative chloromuconate cycloisomerase	0.574261	1.16733	Down	-0.22321	0.259564
CD1390		putative membrane protein	0.960268	1.01464	Down	-0.020964	0.236355
CD1391		putative esterase	0.877576	1.09798	Down	-0.134851	0.530503
CD1392		putative endoribonuclease	0.491356	1.22218	Up	0.289457	0.271643
CD1393		putative membrane protein	0.273594	1.71267	Down	-0.776243	0.439692
CD1394		putative oxidoreductase	0.202736	1.24322	Down	-0.314078	0.135734
CD1395		putative membrane protein	0.931977	1.03785	Up	0.0536011	0.369044
CD1396		putative amino acid amidase	0.737479	1.08805	Up	0.121742	0.236063
CD1397		conserved hypothetical protein	0.238672	1.47862	Down	-0.564247	0.275781
CD1398		putative peptidase	0.882417	1.03886	Down	-0.055001	0.224059
CD1399		putative muramoyltetrapeptide carboxypeptidase	0.0963079	1.42093	Up	0.506835	0.146063
CD1400		conserved hypothetical protein	0.0421361	1.72036	Up	0.782712	0.153674
CD1401		conserved hypothetical protein	0.108893	1.45937	Down	-0.545346	0.16692
CD1402	glpQ	glycerophosphoryl diester phosphodiesterase	0.13817	1.38945	Down	-0.474514	0.163327
CD1403		putative nonribosomal peptide synthetase	0.214035	1.19179	Down	-0.253124	0.113502
CD1404		putative oligopeptide transporter	0.0780327	1.85628	Down	-0.892413	0.232342
CD1404A		conserved hypothetical protein	0.244925	1.65636	Down	-0.728017	0.375128
CD1405		ABC transporter, ATP-binding protein	0.138702	1.48567	Up	0.571113	0.197605
CD1406		putative exported protein	0.0418797	1.64319	Up	0.716495	0.140018
CD1407		GntR-family transcriptional regulator	0.599528	1.17838	Up	0.236805	0.295244
CD1408	ddl	D-alanine--D-alanine ligase B	0.77508	1.1451	Up	0.195477	0.436279
CD1409		putative competence protein	0.369192	1.45803	Up	0.544022	0.385755
CD1410		putative hydrolase	0.900871	1.03712	Up	0.052576	0.251288
CD1411		conserved hypothetical protein	0.981606	1.00553	Down	-0.00795139	0.186872
CD1412		sigma-54 dependent regulatory protein	0.0544246	1.99657	Up	0.997522	0.219927
CD1413		putative membrane protein	0.0316224	2.2434	Down	-1.16569	0.202191
CD1414		putative radical SAM-superfamily protein	0.223378	2.16074	Down	-1.11153	0.51082
CD1415		putative membrane protein	0.312062	1.31428	Down	-0.394277	0.244542
CD1416		putative membrane protein	0.187941	1.22873	Up	0.297167	0.122497
CD1417		putative ATP-binding protein	0.381773	1.19414	Down	-0.255978	0.186416
CD1418		putative drug/sodium antiporter	0.889224	1.05544	Down	-0.0778395	0.333834
CD1418A		putative integrase (partial)	0.579599	1.09881	Down	-0.135942	0.160173
CD1418B		hypothetical protein	0.401787	1.12811	Up	0.173909	0.132684
CD1419		putative signaling protein	0.600737	1.05615	Down	-0.0788117	0.0986039
CD1420		putative signaling protein	0.906849	1.01848	Up	0.0264127	0.135269
CD1421		putative signaling protein	0.449808	1.23459	Up	0.304035	0.25964
CD1422		MerR-family transcriptional regulator	0.384099	1.0684	Down	-0.0954542	0.069919
CD1423		hypothetical protein	0.123088	1.31491	Up	0.394959	0.128226
CD1424		hypothetical protein	0.115349	2.1374	Down	-1.09586	0.345043
CD1425		putative membrane protein	0.458831	1.24279	Up	0.313584	0.272554
CD1426		putative isochorismatase (pseudogene)	0.364996	1.05143	Down	-0.0723591	0.0507825
CD1428		putative transcriptional regulator	0.440301	1.38206	Down	-0.466824	0.390214
CD1428A		hypothetical protein	0.171827	1.20291	Up	0.266523	0.103986
CD1429		conserved hypothetical protein	0.363783	1.20714	Down	-0.271589	0.189865
CD1430		putative exported polysaccharide deacetylase	0.237865	1.21815	Up	0.28469	0.137845
CD1431		putative exonuclease	0.692927	1.08759	Up	0.121137	0.199435
CD1432		putative ribonuclease	0.701873	1.14759	Up	0.198604	0.339977
CD1433		putative bifunctional protein: peroxiredoxin/chitinase	0.958873	1.01085	Up	0.0155709	0.167916
CD1434		putative membrane protein	0.354962	1.28443	Up	0.361129	0.247398
CD1435		putative membrane protein	0.436921	1.54949	Down	-0.63179	0.523983
CD1436		putative exported protein	0.0786384	1.34746	Down	-0.430243	0.112479
CD1437		putative sigma-54-dependent transcriptional regulator (partial)	0.278449	1.22254	Down	-0.289876	0.166186
CD1438		putative multiprotein complex assembly protein	0.366409	1.29183	Down	-0.369413	0.259937
CD1439		putative membrane protein	0.211119	1.22274	Down	-0.290112	0.128894
CD1440		putative membrane protein	0.499331	1.19188	Down	-0.253234	0.241617
CD1441		putative membrane protein	0.963562	1.00795	Up	0.0114169	0.141456
CD1442		hypothetical protein	0.921144	1.05527	Down	-0.0776098	0.470704
CD1443		putative exported protein	0.507719	1.28459	Down	-0.361312	0.352544
CD1444		putative exported polysaccharide deacetylase	0.461174	1.1136	Down	-0.155226	0.135626
CD1445	pabA	para-aminobenzoate synthase glutamine amidotransferase component II	0.283442	1.13435	Up	0.181865	0.105467
CD1446	pabB	para-aminobenzoate synthase component I	0.0343457	1.38675	Up	0.471713	0.0848763
CD1447	pabC	putative aminodeoxychorismate lyase	0.0740034	1.53174	Up	0.615169	0.156284
CD1448		conserved hypothetical protein	0.266965	1.25255	Up	0.324866	0.180503
CD1449	folE	putative GTP cyclohydrolase I	0.116137	1.25033	Up	0.322307	0.101877
CD1450	folP	dihydropteroate synthase	0.0632933	1.30038	Up	0.378929	0.0902783
CD1451	folB	dihydroneopterin aldolase	0.0567041	1.36776	Up	0.451817	0.101324
CD1452	folK	2-amino-4-hydroxy-6-hydroxymethyldihydropteridin e pyrophosphokinase	0.0135454	1.68426	Up	0.752113	0.0925339
CD1453		putative chorismate biosynthesis-related protein [includes: phospho-2-dehydro-3-deoxyheptonate aldolase and chorismate mutase]	0.00368016	1.75037	Up	0.807661	0.0463806
CD1454	dnaG	DNA primase	0.783513	1.04007	Up	0.0566804	0.130993
CD1455	rpoD1	RNA polymerase sigma factor (sigma-43)	0.103859	1.6575	Up	0.729007	0.217253
CD1456		conserved hypothetical protein	0.101198	1.49402	Up	0.579204	0.17051
CD1457		conserved hypothetical protein	0.0356609	1.71198	Up	0.775663	0.141647
CD1458	wrbA	putative flavoprotein	0.0125159	1.8207	Up	0.864491	0.100551
CD1459		putative 5-nitroimidazole reductase	0.484418	1.41442	Down	-0.500212	0.461134
CD1460		putative phosphohydrolase	0.131969	1.28788	Up	0.364995	0.122875
CD1461		putative membrane protein	0.547698	1.19426	Up	0.256115	0.276838
CD1462		GntR-family transcriptional regulator	0.486393	1.12837	Down	-0.174246	0.16146
CD1463		putative membrane protein	0.0457414	3.55622	Down	-1.83035	0.380388
CD1464		two-component response regulator	0.0419764	1.49863	Down	-0.583644	0.114241
CD1465		two-component sensor kinase	0.0135454	1.84642	Down	-0.884733	0.108988
CD1466		ABC transporter, ATP-binding protein	0.349275	1.263	Down	-0.336858	0.227803
CD1467		ABC transporter, permease protein	0.388593	1.3391	Down	-0.421264	0.312315
CD1468		putative iron-sulfur protein	0.246445	1.19899	Up	0.261824	0.13603
CD1469	cwp20	cell surface protein (putative penicillin-binding protein)	0.0421361	2.36527	Down	-1.242	0.245762
CD1470		putative phage shock protein	0.282795	1.76834	Down	-0.822395	0.475847
CD1471		putative membrane protein (putative phage infection protein)	0.567417	1.28358	Down	-0.36017	0.41205
CD1472		ABC transporter, ATP-binding/permease protein	0.0844268	1.33121	Down	-0.412738	0.111623
CD1473		ABC transporter, ATP-binding/permease protein	0.104243	1.5549	Down	-0.636826	0.19007
CD1474		putative ruberythrin	0.407102	1.30158	Down	-0.38026	0.293495
CD1475		putative hydrolase	0.00311873	2.97301	Down	-1.57193	0.0806009
CD1476		putative signaling protein	0.0240752	1.29766	Down	-0.375908	0.0582382
CD1477		putative ferrous iron transport protein	0.200252	2.28919	Down	-1.19484	0.511902
CD1478	feoA1	putative ferrous iron transport protein A	0.0409756	2.84513	Down	-1.5085	0.290529
CD1479	feoB1	ferrous iron transport protein B	0.0592497	2.39085	Down	-1.25752	0.290752
CD1480		putative exported protein	0.0391857	1.87256	Down	-0.905013	0.171738
CD1481		conserved hypothetical protein	0.0973465	1.48292	Up	0.568437	0.164544
CD1482	ssuC	putative aliphatic sulfonate ABC transporter,permease protein	0.238672	1.3355	Up	0.417378	0.203659
CD1483	ssuB	putative aliphatic sulfonates ABC transporter,ATP-binding protein	0.120462	1.50689	Up	0.591573	0.190433
CD1484	ssuA	putative aliphatic sulfonates ABC transporter,substrate-binding lipoprotein	0.132992	1.27851	Up	0.354466	0.11991
CD1485		conserved hypothetical protein	0.14543	1.94504	Down	-0.959802	0.342952
CD1486		putative lipoprotein	0.632094	1.32435	Up	0.405286	0.555054
CD1487		hypothetical protein	0.829054	1.06537	Up	0.0913504	0.263767
CD1488		putative transcriptional regulator	0.194315	1.63252	Down	-0.707105	0.296497
CD1489	metN	D-methionine ABC transporter, ATP-binding protein	0.106998	1.60062	Down	-0.678634	0.206199
CD1490	metI	putative D-methionine ABC transporter, permease protein	0.0415331	1.60358	Down	-0.681296	0.13235
CD1491	metQ	putative D-methionine ABC transporter,substrate-binding lipoprotein	0.0300348	1.46021	Down	-0.546179	0.09276
CD1492		putative two-component sensor histidine kinase	0.651892	1.06672	Down	-0.0931776	0.135342
CD1493		putative 3-methyladenine DNA glycosylase	0.993965	1.00129	Up	0.00185469	0.137983
CD1494		putative transcriptional regulator	0.368241	1.07645	Up	0.106279	0.0751004
CD1495	proC1	pyrroline-5-carboxylate reductase	0.907573	1.01327	Up	0.0190165	0.098663
CD1496		putative exported protein	0.271926	1.13554	Down	-0.18338	0.103247
CD1497		hypothetical protein	0.238672	1.37708	Up	0.461607	0.225891
CD1498	rpoD2	RNA polymerase sigma factor rpoD	0.955033	1.01486	Down	-0.0212867	0.211472
CD1499		putative membrane protein (virulence factor (MviN) homologue)	0.51025	1.19807	Up	0.260711	0.255993
CD1500	tlpB	putative transposase-like protein B	0.506831	1.26813	Up	0.342699	0.333466
CD1501		putative membrane protein (virulence factor (MviN) homologue)	0.364996	1.05143	Down	-0.0723591	0.0507825
CD1502	deoC	putative deoxyribose-phosphate aldolase	0.426456	1.18082	Down	-0.239787	0.194505
CD1503		putative transcriptional regulator	0.384943	1.20544	Up	0.269555	0.197902
CD1504		ABC transporter, ATP-binding protein	0.0815948	1.29846	Down	-0.376801	0.100714
CD1505		putative ABC transporter, permease protein	0.854153	1.06354	Up	0.0888766	0.300004
CD1506		putative drug/sodium antiporters	0.0852332	2.3624	Down	-1.24025	0.337628
CD1507		putative thioredoxin	0.207712	1.56275	Up	0.644091	0.282785
CD1507A		conserved hypothetical protein	0.149479	1.81205	Up	0.857621	0.310602
CD1508		putative iron-sulfur cluster-binding protein	0.241011	1.55991	Up	0.641464	0.322375
CD1509		putative lipoprotein	0.269998	1.41527	Up	0.501075	0.280793
CD1510		conserved hypothetical protein	0.284647	1.63297	Up	0.707502	0.411803
CD1511		conserved hypothetical protein	0.744486	1.06531	Down	-0.0912706	0.180923
CD1512	panC	putative pantoate--beta-alanine ligase	0.920958	1.03007	Down	-0.0427413	0.25835
CD1513	panB	3-methyl-2-oxobutanoate hydroxymethyltransferase	0.382839	1.29535	Down	-0.373346	0.272623
CD1514		conserved hypothetical protein	0.806279	1.09411	Down	-0.129758	0.333273
CD1515		putative signaling protein	0.0434535	1.8498	Up	0.887368	0.178128
CD1516		MerR-family transcriptional activator	0.871134	1.03965	Up	0.0560989	0.211817
CD1517	feoB2	putative ferrous ion transport protein	0.147019	1.77245	Down	-0.825747	0.296826
CD1518	feoA2	putative ferrous ion transport protein	0.0441838	1.80591	Down	-0.852727	0.173362
CD1519		putative acetyltransferase	0.47093	1.58397	Down	-0.663549	0.59298
CD1520		putative membrane protein	0.747529	1.13419	Down	-0.181665	0.364487
CD1521	tyrR	tyrosyl-tRNA synthetase	0.352663	1.21379	Up	0.279518	0.190685
CD1522		putative polysaccharide deacetylase	0.0116643	2.19511	Down	-1.1343	0.124638
CD1523		putative membrane protein	0.304208	1.66817	Down	-0.738262	0.45014
CD1524		putative rubrerythrin	0.508448	1.23031	Down	-0.299016	0.292413
CD1525		putative iron-sulfur protein	0.044183	1.84029	Down	-0.879933	0.178504
CD1526	pyrC	dihydroorotase	0.771154	1.0624	Up	0.087323	0.191587
CD1527		ABC transporter, permease protein	0.0173896	2.08565	Up	1.0605	0.143875
CD1528		ABC transporter, ATP-binding protein	0.02461	2.4465	Up	1.29072	0.20191
CD1529		putative ABC transporter, permease protein	0.027033	1.83325	Up	0.874407	0.142966
CD1530		two-component sensor histidine kinase	0.180893	1.24479	Up	0.315906	0.126725
CD1531		two-component response regulator	0.526194	1.16539	Down	-0.220815	0.225248
CD1532		ABC transporter, ATP-binding protein	0.52736	1.36107	Up	0.444742	0.456244
CD1533		putative ABC transporter, permease protein	0.238672	1.26735	Up	0.34181	0.16946
CD1534		putative gamma-glutamyltranspeptidase	0.0369675	1.83414	Up	0.875103	0.162806
CD1535	sseA	putative 3-mercaptopyruvate sulfurtransferase	0.997878	1.00065	Up	0.000943647	0.181228
CD1536		putative dehydrogenase, electron transfer subunit	0.099929	1.50476	Up	0.589536	0.172628
CD1537	aspB	putative glutamate synthase [NADPH] small chain	0.0185714	1.49975	Up	0.584722	0.0819093
CD1538		putative signaling protein	0.981676	1.00323	Down	-0.00465326	0.110869
CD1539		ABC transporter, ATP-binding protein	0.424943	1.13228	Up	0.179232	0.144723
CD1540		ABC transporter, permease protein	0.909415	1.03293	Up	0.0467372	0.249007
CD1541		putative drug/sodium antiporter	0.257193	1.67721	Down	-0.746066	0.40369
CD1542		conserved hypothetical protein	0.251893	1.7717	Down	-0.825137	0.437796
CD1543		putative acyl carrier protein phosphodiesterase	0.0460427	1.43443	Down	-0.520473	0.108524
CD1543A		hypothetical protein	0.562692	1.23172	Up	0.300678	0.339136
CD1545		conserved hypothetical protein	0.0406282	2.85843	Down	-1.51522	0.290668
CD1546		putative hemolysin-like membrane protein	0.0253131	4.4661	Down	-2.15901	0.343174
CD1547	hisZ	putative ATP phosphoribosyltransferase regulatory subunit	0.209755	1.54336	Up	0.626074	0.277102
CD1548	hisG	putative ATP phosphoribosyltransferase	0.196619	1.67427	Up	0.743534	0.315054
CD1549	hisC	putative histidinol-phosphate aminotransferase	0.248668	1.64528	Up	0.718336	0.376073
CD1550	hisB	imidazoleglycerol-phosphate dehydratase	0.591225	1.32388	Up	0.404773	0.491855
CD1551	hisH	putative imidazole glycerol phosphate synthase subunit	0.384642	1.43036	Up	0.516381	0.37885
CD1552	hisA	putative 1-(5-phosphoribosyl)-5-[(5-phosphoribosylamino)methylidene amino] imidazole-4-carboxamide isomerase	0.412102	1.36641	Up	0.450395	0.353807
CD1553	hisF	putative imidazole glycerol phosphate synthase subunit	0.666169	1.18563	Up	0.245654	0.371917
CD1554	hisI	histidine biosynthesis bifunctional protein [includes: phosphoribosyl-AMP cyclohydrolase and phosphoribosyl-ATP pyrophosphatase]	0.861534	1.09627	Up	0.132604	0.473385
CD1555		putative amino acid permease	0.367062	1.23096	Down	-0.299786	0.211359
CD1556		putative polysaccharide deacetylase	0.13172	1.76183	Up	0.817074	0.274828
CD1557		putative peptidyl-prolyl isomerase	0.6327	1.16689	Up	0.222665	0.306154
CD1558	sigV	RNA polymerase sigma factor	0.849785	1.09729	Up	0.13395	0.437468
CD1559		conserved hypothetical protein	0.560176	1.16504	Up	0.22038	0.246007
CD1560		putative exported protein	0.359395	1.23449	Down	-0.303909	0.210042
CD1561		putative dehydrogenase accessory protein	0.108664	1.46469	Down	-0.550597	0.168218
CD1562		conserved hypothetical protein	0.109149	1.77172	Down	-0.825152	0.252907
CD1564		hypothetical protein	0.0119045	2.1405	Down	-1.09795	0.124673
CD1565	ilvC	ketol-acid reductoisomerase	0.147649	2.10297	Down	-1.07243	0.386223
CD1566	ilvB	putative acetolactate synthase large subunit	0.262748	2.42431	Down	-1.27757	0.701808
CD1567		putative manganese-containing catalase	0.185615	2.84153	Down	-1.50667	0.615913
CD1568		conserved hypothetical protein	0.0137073	1.94386	Down	-0.958923	0.119083
CD1569		MarR-family transcriptional regulator	0.0247222	2.24547	Up	1.16702	0.183103
CD1570		putative lysophospholipase	0.112887	1.31487	Up	0.394921	0.122998
CD1571	tlpA	transposase-like protein A	0.138509	1.48409	Up	0.569582	0.196628
CD1572	tlpB	putative transposase-like protein B	0.506831	1.26813	Up	0.342699	0.333466
CD1573		putative transcriptional regulator	0.607783	1.10569	Down	-0.144945	0.184775
CD1574		conserved hypothetical protein	0.759658	1.07874	Down	-0.109341	0.229239
CD1575		putative exported protein	0.970738	1.01829	Down	-0.026151	0.395692
CD1576		putative arylesterase	0.421559	1.1424	Down	-0.192074	0.154045
CD1577	pgm1	putative phosphoglucomutase	0.644255	1.06441	Down	-0.0900522	0.127908
CD1578		putative membrane-associated ribonuclease	0.248963	1.43681	Down	-0.522871	0.274337
CD1579		putative two-component histidine kinase	0.0416136	1.3669	Down	-0.450908	0.0878792
CD1580	hom2	homoserine dehydrogenase	0.0329212	4.33373	Down	-2.11561	0.374634
CD1581		hypothetical protein	0.0431082	3.5761	Down	-1.83839	0.367702
CD1582	hisD	histidinol dehydrogenase	0.247572	1.30958	Down	-0.3891	0.202978
CD1583		conserved hypothetical protein	0.283566	1.25609	Up	0.328944	0.190915
CD1583A		conserved hypothetical protein	0.154419	1.65178	Up	0.724021	0.266727
CD1584		putative sugar metabolism repressor	0.119795	1.50166	Down	-0.586556	0.188329
CD1585		putative N-acetylglucosamine kinase	0.0633848	1.37247	Down	-0.45678	0.109028
CD1586		hypothetical protein	0.099929	2.64199	Down	-1.40162	0.410303
CD1587		putative ribose ABC transporter, ATP-binding protein	0.0409756	1.68381	Down	-0.751727	0.144661
CD1588		putative ribose ABC transporter, permease protein	0.346553	1.38684	Down	-0.471806	0.317467
CD1589		putative ribose ABC transporter,substrate-binding lipoprotein	0.25875	1.9907	Down	-0.993275	0.540109
CD1590		putative membrane protein	0.207712	1.55594	Down	-0.637786	0.28006
CD1591	kdpA	potassium-transporting ATPase A chain	0.142448	2.15459	Down	-1.10741	0.390958
CD1592	kdpB	potassium-transporting ATPase B chain	0.624628	1.12042	Down	-0.164043	0.21935
CD1593	kdpC	potassium-transporting ATPase C chain	0.220169	1.78095	Down	-0.832645	0.378982
CD1594	cysM	putative O-acetylserine sulfhydrylase	0.043428	4.11355	Down	-2.04039	0.409264
CD1595	cysA	serine acetyltransferase	0.103179	3.50852	Down	-1.81086	0.5379
CD1596	map2	methionine aminopeptidase	0.143751	1.15665	Down	-0.209958	0.0745087
CD1597		hypothetical protein	0.0726562	1.92494	Down	-0.944813	0.237919
CD1598		putative endonuclease	0.199673	1.59571	Up	0.674195	0.288295
CD1599	thiD	putative phosphomethylpyrimidine kinase	0.0171332	1.7453	Up	0.803476	0.108302
CD1600	thiK	hydroxyethylthiazole kinase	0.0329212	1.80241	Up	0.849925	0.150245
CD1601	thiE1	thiamine-phosphate pyrophosphorylase	0.0255796	1.97677	Up	0.983142	0.156977
CD1602		PTS system, IIb component	0.00971802	1.63637	Up	0.710501	0.0683114
CD1603		ABC transporter, permease protein	0.990013	1.0076	Up	0.0109223	0.459777
CD1604		ABC transporter, ATP-binding protein	0.209755	1.19098	Up	0.252143	0.111571
CD1605		conserved hypothetical protein	0.257193	1.15771	Up	0.211275	0.11433
CD1606		GntR-family transcriptional regulator	0.230627	1.19194	Up	0.253317	0.119407
CD1607		ABC transporter, ATP-binding protein	0.104616	1.34846	Up	0.43131	0.129263
CD1608		putative ABC transporter, permease protein	0.0779475	1.20482	Up	0.268818	0.0699376
CD1609		putative exported protein	0.119437	1.54884	Up	0.631188	0.202419
CD1610		putative membrane protein	0.058432	1.40943	Up	0.495108	0.113753
CD1611		putative exported protein	0.0811969	1.28889	Up	0.36613	0.0974953
CD1612		putative amidohydrolase	0.00879442	1.31626	Up	0.39645	0.0359029
CD1613		hypothetical protein	0.499144	1.31249	Down	-0.392312	0.374
CD1614		putative sodium extrusion ABC transporter,ATP-binding protein	0.279572	1.3348	Up	0.416626	0.23939
CD1615		putative sodium extrusion ABC transporter,permease protein	0.911394	1.03966	Down	-0.056111	0.304353
CD1616		putative signaling protein	0.769017	1.10844	Down	-0.14853	0.323259
CD1617		GntR-family transcriptional regulator	0.409515	1.31488	Down	-0.394928	0.307191
CD1618		ABC transporter, ATP-binding protein	0.590521	1.28138	Down	-0.357696	0.433792
CD1619		putative ABC transporter, peremase protein	0.857603	1.09897	Down	-0.136153	0.472405
CD1620		putative permease	0.272604	1.5451	Down	-0.627704	0.354112
CD1621		putative mechanosensitive ion channel protein	0.385133	1.13681	Down	-0.184995	0.135893
CD1622		putative lipoprotein	0.100101	1.15968	Down	-0.213721	0.0626379
CD1623		putative nitric oxide reductase flavoprotein	0.206871	1.28562	Down	-0.362466	0.158768
CD1624	vanR	two-component response regulator	0.0902645	1.57254	Down	-0.653098	0.182477
CD1625	vanS	two-component sensor histidine kinase	0.152593	1.19993	Down	-0.262945	0.0963228
CD1626	vanG	putative D-alanine:D-alanine ligase (putative vancomycin/teicoplanin A-type resistance protein)	0.227458	1.19698	Up	0.259404	0.120786
CD1627		putative D-alanyl-D-alanine carboxypeptidase	0.994687	1.00112	Up	0.00162169	0.133458
CD1628	vanTG	serine/alanine racemase	0.854153	1.0834	Up	0.115566	0.392071
CD1629		putative membrane protein	0.242843	1.5226	Up	0.606542	0.309751
CD1630		putative membrane-associated metal-dependent hydrolase	0.101408	2.0584	Down	-1.04152	0.306898
CD1631	sodA	putative superoxide dismutase [Mn]	0.185115	2.14031	Down	-1.09782	0.447445
CD1632	asnB	asparagine synthetase	0.0431082	1.61766	Down	-0.693906	0.138856
CD1633		putative serine protease	0.769472	1.07954	Up	0.110423	0.240789
CD1634		tellurium resistance protein	0.027033	1.25733	Up	0.330364	0.0540022
CD1635		tellurium resistance protein	0.244998	1.27516	Up	0.350676	0.180905
CD1636		tellurium resistance protein	0.938849	1.01614	Up	0.0231053	0.174865
CD1637		putative calcium-transporting ATPase	0.0261872	1.45895	Up	0.544933	0.0882033
CD1638		conserved hypothetical protein	0.970738	1.0131	Down	-0.0187737	0.283414
CD1639		putative tellurite resistance protein	0.562765	1.12482	Up	0.169689	0.191518
CD1640		conserved hypothetical protein	0.380266	1.31286	Down	-0.39271	0.284946
CD1641		conserved hypothetical protein	0.178388	2.02355	Down	-1.01689	0.405046
CD1642		conserved hypothetical protein	0.254382	1.47407	Down	-0.559803	0.299659
CD1643		conserved hypothetical protein	0.269998	1.23913	Down	-0.309327	0.173352
CD1644		putative transcriptional regulator	0.148404	1.43535	Up	0.5214	0.188248
CD1645		putative membrane protein	0.138702	1.27651	Down	-0.3522	0.122394
CD1646		putative dipeptidase	0.883871	1.036	Up	0.051019	0.210423
CD1647		putative iron compound ABC transporter, permease protein	0.251888	1.55229	Down	-0.634399	0.336515
CD1648		putative iron compound ABC transporter, permease protein	0.978735	1.01521	Up	0.0217847	0.454743
CD1649		putative iron compound ABC transporter,ATP-binding protein	0.769017	1.07676	Up	0.106696	0.232075
CD1650		putative iron compound ABC transporter,substrate-binding protein	0.123344	1.54147	Down	-0.624307	0.20298
CD1651		putative signaling protein	0.484302	1.15788	Up	0.211482	0.194761
CD1652		putative tellurium resistance protein	0.45718	1.28288	Down	-0.359381	0.311315
CD1653		putative lipoprotein	0.0841898	1.67131	Down	-0.740982	0.200166
CD1654	lplA	putative lipoate-protein ligase	0.621504	1.10409	Down	-0.142863	0.189159
CD1655		putative Na+/H+ antiporter	0.590521	1.15415	Up	0.206829	0.250793
CD1656		putative membrane protein	0.945291	1.01666	Down	-0.023841	0.201559
CD1657		putative bi-functional glycine dehydrogenase/aminomethyl transferase protein	0.194897	1.16545	Up	0.220891	0.0928853
CD1658	gcvPB	glycine cleavage system P protein	0.490277	1.19713	Up	0.259579	0.24265
CD1659		probable cation-transporting ATPase	0.560825	1.16904	Up	0.22532	0.252887
CD1660		conserved hypothetical protein	0.907362	1.04426	Up	0.062479	0.323176
CD1661	tlpB	putative transposase-like protein B	0.506831	1.26813	Up	0.342699	0.333466
CD1662		conserved hypothetical protein	0.257193	1.35269	Up	0.435836	0.235733
CD1663	guaD	guanine deaminase	0.271159	1.488	Up	0.573374	0.322151
CD1664		putative transcriptional regulator	0.273193	1.33646	Down	-0.41842	0.236509
CD1665	cysK	cysteine synthase A	0.301928	1.42659	Down	-0.512575	0.310484
CD1666		putative glycerophosphoryl diester phosphodiesterase	0.0116643	2.05908	Down	-1.042	0.114657
CD1667		probable sugar O-acetyltransferase	0.0662337	1.45236	Up	0.538396	0.130704
CD1668		putative membrane protein	0.233454	1.19899	Up	0.261824	0.124796
CD1669		ABC transporter, ATP-binding protein	0.507805	1.10904	Up	0.14931	0.145776
CD1670		putative ABC transporter, permease protein	0.500212	1.08872	Up	0.122639	0.117372
CD1671		two-component response regulator	0.724293	1.12622	Up	0.171487	0.317423
CD1672		two-component sensor histidine kinase	0.960994	1.01378	Down	-0.0197483	0.228696
CD1673		putative membrane protein	0.789616	1.1134	Down	-0.154968	0.367846
CD1674		putative NADPH-dependent FMN reductase	0.254592	1.4227	Down	-0.508627	0.272864
CD1675		putative transcriptional regulator	0.851917	1.05864	Up	0.08221	0.272837
CD1676	pcp	pyrrolidone-carboxylate peptidase	0.0854732	2.0117	Down	-1.00841	0.274849
CD1677		putative membrane protein	0.893741	1.08695	Down	-0.120292	0.534052
CD1678		putative membrane protein	0.302741	1.15139	Up	0.203372	0.123522
CD1678A		hypothetical protein	0.238295	1.21242	Up	0.277888	0.134738
CD1679		putative flavodoxin	0.207551	1.83963	Down	-0.879419	0.385752
CD1680		putative FMN-binding exported protein	0.195761	1.72454	Down	-0.786213	0.33228
CD1681		TetR-family transcriptional regulator	0.111408	1.67845	Down	-0.747133	0.231022
CD1682	iunH	inosine-uridine preferring nucleoside hydrolase	0.62484	1.18918	Down	-0.249971	0.335047
CD1683		putative membrane protein	0.597219	1.16391	Down	-0.218982	0.270834
CD1684		radical SAM-superfamily protein	0.804387	1.07078	Down	-0.098664	0.250876
CD1685		conserved hypothetical protein	0.102126	1.27307	Up	0.34831	0.103054
CD1686		putative DNA-binding protein	0.839732	1.05806	Down	-0.0814165	0.249961
CD1687		putative lipoprotein	0.334515	1.18726	Down	-0.247635	0.162387
CD1688		two-component response regulator	0.356888	1.13994	Down	-0.188956	0.129982
CD1689		two-component sensor histidine kinase	0.952184	1.00852	Down	-0.01224	0.114791
CD1690	trxA1	thioredoxin	0.0440008	1.69205	Down	-0.758769	0.153439
CD1691	trxB1	thioredoxin reductase	0.0207801	1.79322	Down	-0.842553	0.122779
CD1692		ArsR-family transcriptional regulator	0.275275	1.40884	Down	-0.494509	0.281484
CD1693		putative dinitrogenase iron-molybdenum cofactor	0.362588	1.18897	Down	-0.249709	0.174144
CD1694		hypothetical protein	0.160073	1.35217	Up	0.43528	0.163714
CD1695		putative arsenical pump membrane protein	0.313944	1.49127	Down	-0.57654	0.359047
CD1696		putative sodium:amino acid symporter	0.228484	2.90796	Down	-1.54001	0.721089
CD1697	ribH	riboflavin synthase beta chain (6,7-dimethyl-8-ribityllumazine synthase)	0.0441427	1.7498	Down	-0.807191	0.163559
CD1698	ribA	riboflavin biosynthesis protein	0.0220983	1.67426	Down	-0.743522	0.110668
CD1699	ribB	riboflavin synthase alpha chain	0.202561	1.48087	Down	-0.566442	0.244658
CD1700	ribD	riboflavin biosynthesis protein [includes: diaminohydroxyphosphoribosylaminopyrimidine deaminase and 5-amino-6-(5-phosphoribosylamino)uracil reductase]	0.082423	1.40557	Down	-0.491153	0.131786
CD1701	recQ	ATP-dependent DNA helicase	0.00984817	1.51638	Up	0.60063	0.0590469
CD1702	thiC	thiamine biosynthesis protein	0.0438137	2.78425	Up	1.47729	0.298254
CD1702A	thiS	putative thiamine biosynthesis protein	0.0329212	2.72791	Up	1.4478	0.256298
CD1703	thiF	putative thiamine biosynthesis protein	0.0523517	2.77355	Up	1.47173	0.320682
CD1704	thiG	thiazole biosynthesis protein	0.135828	1.70296	Up	0.768041	0.262272
CD1705	thiH	putative thiamine biosynthesis protein	0.201665	2.00867	Up	1.00624	0.433485
CD1706	thiE2	putative thiamine biosynthesis protein	0.177672	1.87051	Up	0.90343	0.359169
CD1707		putative C4-dicarboxylate anaerobic carrier	0.480652	1.22855	Down	-0.296962	0.27143
CD1708		conserved hypothetical protein	0.407379	1.27345	Up	0.348744	0.269839
CD1709		putative molybdopterin-guanine biosynthesis protein	0.381773	1.20502	Up	0.269055	0.196054
CD1710		hypothetical protein	0.339719	1.469	Down	-0.554833	0.367866
CD1711		conserved hypothetical protein	0.784539	1.05346	Down	-0.0751307	0.174407
CD1712	moaB	putative molybdenum cofactor biosynthesis protein	0.83748	1.0463	Up	0.0652942	0.198165
CD1713	moaA	molybdenum cofactor biosynthesis protein	0.412039	1.1367	Up	0.184849	0.145061
CD1714	moaC	molybdenum cofactor biosynthesis protein	0.187941	1.18726	Up	0.247637	0.102189
CD1715		putative molybdenum cofactor sulfurase	0.477931	1.13899	Up	0.187753	0.170378
CD1716		probable permease	0.226415	1.47705	Up	0.562718	0.261365
CD1717		conserved hypothetical protein	0.952455	1.01115	Down	-0.015996	0.151012
CD1718		putative hydantoinase	0.0119045	1.38651	Up	0.471455	0.0528636
CD1719	tlpB	putative transposase-like protein B	0.506831	1.26813	Up	0.342699	0.333466
CD1721		conserved hypothetical protein	0.0135454	1.77626	Up	0.828845	0.102171
CD1722		putative transcriptional regulator	0.15222	1.70219	Up	0.767388	0.280817
CD1723		probable acyltransferase	0.0902645	1.87369	Up	0.90588	0.253162
CD1724		hypothetical protein	0.425402	1.15753	Up	0.211046	0.170694
CD1725		AraC-family transcriptional regulator	0.526675	1.16421	Up	0.219355	0.224173
CD1726		conserved hypothetical protein	0.184711	1.25906	Up	0.332348	0.135264
CD1727		putative membrane protein	0.298621	1.53578	Down	-0.61897	0.372395
CD1728		conserved hypothetical protein	0.257273	1.65279	Down	-0.724902	0.392417
CD1729		putative sodium/phosphate cotransporter	0.269662	1.65498	Up	0.726811	0.406816
CD1729A		putative transcriptional regulator (partial)	0.242714	1.2025	Up	0.266032	0.135307
CD1730		putative ATP-binding protein	0.227458	1.70769	Up	0.772045	0.359976
CD1731		putative acetyltransferase	0.0644972	1.77513	Up	0.827922	0.198849
CD1732		putative corrinoid protein	0.0148848	1.48349	Up	0.568997	0.0733621
CD1733		putative methyltransferase	0.0421361	2.22042	Up	1.15084	0.227117
CD1734		hypothetical protein	0.0963079	1.97838	Up	0.984322	0.28379
CD1735		putative hydrolase	0.538571	1.10308	Up	0.141535	0.149144
CD1736		putative transcriptional regulator	0.580506	1.13421	Down	-0.181692	0.214871
CD1737		putative gluconate permease	0.915057	1.0362	Up	0.0512968	0.290116
CD1738		two-component sensor histidine kinase	0.753892	1.0374	Up	0.052966	0.108585
CD1739		two-component response regulator	0.349352	1.12169	Down	-0.16568	0.112129
CD1740	grdG	sarcosine reductase complex component B alpha subunit	0.953174	1.01331	Up	0.0190728	0.183328
CD1741	grdF	sarcosine reductase complex component b beta subunit	0.18756	1.23419	Up	0.303559	0.124732
CD1743		two-component response regulator	0.470364	1.14092	Up	0.190197	0.169678
CD1744		two-component sensor histidine kinase	0.142126	1.60086	Up	0.678846	0.239174
CD1745		hypothetical protein	0.432402	1.37147	Up	0.455722	0.374105
CD1745A		putative ferrous iron transport protein A	0.241928	1.65734	Down	-0.728868	0.368408
CD1746	gltC	sodium/glutamate symporter	0.592216	1.16347	Down	-0.218438	0.266093
CD1747	add	adenosine deaminase	0.560264	1.15583	Down	-0.20893	0.233338
CD1748		conserved hypothetical protein	0.500212	1.08933	Up	0.12344	0.118157
CD1749	hgdB	putative 2-hydroxyacyl-CoA dehydratase	0.0205228	1.61107	Up	0.688021	0.0995912
CD1750	hgdC	putative (R)-2-hydroxyglutaryl-CoA dehydratase alpha-subunit	0.0210807	1.28348	Up	0.360061	0.0529213
CD1751	cwp13	cell surface protein (putative cell surface-associated cysteine protease)	0.247111	1.24687	Up	0.318317	0.165829
CD1752		TetR-family transcriptional regulator	0.480624	1.23386	Down	-0.303174	0.27682
CD1753		ABC transporter, ATP-binding protein	0.00758565	1.92192	Down	-0.942548	0.0801007
CD1754		putative ABC transporter, permease protein	0.0792717	2.60134	Down	-1.37926	0.362409
CD1755		putative ABC transporter, permease protein	0.145765	2.34003	Down	-1.22653	0.439228
CD1755A		putative transcriptional regulator	0.409766	1.33665	Down	-0.418617	0.326285
CD1756	def1	peptide deformylase 1	0.393578	1.42798	Down	-0.513975	0.38462
CD1757		conserved hypothetical protein	0.211381	1.43115	Down	-0.517176	0.230087
CD1758		radical SAM-superfamily protein	0.119806	1.4529	Down	-0.538937	0.173103
CD1759		conserved hypothetical protein	0.215882	1.61884	Up	0.694957	0.313141
CD1759A		conserved hypothetical protein (partial)	0.516825	1.49679	Up	0.581875	0.57942
CD1760		putative iron-sulfur protein	0.230007	1.28768	Down	-0.364772	0.171575
CD1761		conserved hypothetical protein	0.323496	1.27116	Down	-0.346148	0.220512
CD1762		conserved hypothetical protein	0.843648	1.09338	Up	0.128796	0.405441
CD1763		putative membrane protein	0.183484	1.67813	Down	-0.746859	0.302672
CD1764		conserved hypothetical protein	0.00630106	2.05325	Up	1.03791	0.0809005
CD1765		Nudix-family hydrolase	0.057804	1.91555	Up	0.937757	0.213316
CD1766		putative lipoprotein	0.250385	1.28278	Up	0.359272	0.189578
CD1767	gapA	glyceraldehyde-3-phosphate dehydrogenase 1	0.65732	1.1206	Up	0.164269	0.242717
CD1768		putative membrane protein	0.0870814	1.56479	Up	0.645971	0.177428
CD1769		conserved hypothetical protein	0.231077	1.40353	Down	-0.489062	0.231035
CD1770	ogt2	methylated-DNA--protein-cysteine methyltransferase 2	0.701814	1.19681	Down	-0.259189	0.443006
CD1771		conserved hypothetical protein	0.756605	1.11092	Down	-0.151757	0.314566
CD1772		hypothetical protein	0.161536	1.2824	Down	-0.358846	0.135556
CD1773		conserved hypothetical protein	0.0416136	1.63656	Down	-0.710665	0.138538
CD1774		amino acid ABC transporter, substrate-binding protein	0.232256	1.3281	Down	-0.409364	0.194524
CD1775		amino acid ABC transporter, permease protein	0.118844	1.27865	Down	-0.354627	0.113487
CD1776		amino acid ABC transporter, ATP-binding protein	0.0963079	1.24683	Down	-0.318268	0.0917938
CD1777		putative arsenate reductase	0.701604	1.17588	Up	0.233743	0.397705
CD1778		conserved hypothetical protein	0.00930967	2.57502	Down	-1.36458	0.126692
CD1779		conserved hypothetical protein	0.0329212	2.21217	Down	-1.14546	0.203487
CD1780		putative methylase	0.240985	1.36629	Down	-0.450261	0.225427
CD1781		putative lipoprotein	0.244998	1.29083	Down	-0.368302	0.190221
CD1782		two-component response regulator	0.0493643	1.26545	Down	-0.339656	0.0724185
CD1783		two-component sensor histidine kinase	0.542436	1.0632	Down	-0.0884131	0.0940621
CD1784	truA2	tRNA pseudouridine synthase 2	0.973655	1.00897	Down	-0.0128891	0.212566
CD1785	argG	argininosuccinate synthase	0.62484	1.14545	Down	-0.195916	0.262415
CD1786		hypothetical protein	0.666169	1.06163	Up	0.0862842	0.130583
CD1787		MerR-family transcriptional regulator	0.634733	1.14302	Down	-0.192845	0.26716
CD1788		putative membrane protein	0.583602	1.07849	Up	0.109015	0.129838
CD1789		putative membrane protein	0.22934	1.14436	Up	0.194541	0.0912883
CD1790		putative exonuclease	0.415382	1.22872	Down	-0.297152	0.235259
CD1791		hypothetical protein	0.611429	1.05936	Down	-0.0831889	0.1071
CD1792		putative L-threonine dehydrogenase	0.241011	1.27357	Up	0.348873	0.175527
CD1793		putative membrane protein	0.174882	2.08785	Down	-1.06202	0.41767
CD1794		hypothetical protein	0.215882	1.33185	Up	0.413429	0.186437
CD1795		conserved hypothetical protein	0.580141	1.36557	Up	0.449506	0.531065
CD1796		putative nitrite and sulfite reductase subunit	0.607783	1.1304	Down	-0.176836	0.225455
CD1797		putative pyridine nucleotide-disulfide oxidoreductase	0.0454305	1.37269	Down	-0.457005	0.0943758
CD1798		LysR-family transcriptional regulator	0.987822	1.00375	Up	0.00540617	0.188578
CD1799		tellurium resistance protein	0.185779	1.56723	Up	0.648221	0.265139
CD1800		tellurium resistance protein	0.137577	1.42427	Up	0.51022	0.175169
CD1801		conserved hypothetical membrane protein	0.231643	1.36951	Down	-0.453662	0.215052
CD1802		putative hydrolase	0.0950885	1.93735	Down	-0.954085	0.272908
CD1803	cwp23	cell surface protein	0.129345	1.94538	Down	-0.960051	0.319542
CD1804	scrR	putative sucrose operon repressor (LacI-family transcriptional regulator)	0.130796	1.91032	Up	0.933817	0.312636
CD1805	sacA	putative sucrose-6-phosphate hydrolase	0.724355	1.07266	Up	0.101189	0.187535
CD1806	scrK	putative fructokinase	0.262258	1.30542	Down	-0.384517	0.210833
CD1807		putative NADPH-dependent FMN reductase	0.144698	2.16031	Down	-1.11124	0.395809
CD1808		putative pyridoxal-dependent decarboxylase	0.349352	1.18613	Up	0.246261	0.166639
CD1809		putative multi-drug resistance efflux pump (pseudogene)	0.364996	1.05143	Down	-0.0723591	0.0507825
CD1810		putative regulatory protein	0.398746	1.3648	Up	0.448686	0.339984
CD1811		putative two-component sensor histidine kinase (partial)	0.535157	1.20478	Down	-0.268771	0.280923
CD1812		putative two-component system response regulator (partial)	0.274377	1.18144	Up	0.240541	0.136535
CD1813		hypothetical protein	0.713104	1.03745	Down	-0.0530376	0.0942054
CD1814		putative phosphoglycerate mutase	0.254592	1.27758	Down	-0.353412	0.189456
CD1815		conserved hypothetical protein	0.350256	1.19413	Down	-0.255961	0.173756
CD1816	cmk	cytidylate kinase	0.608151	1.22157	Down	-0.288742	0.368656
CD1817		putative acyltransferase	0.149908	1.33269	Down	-0.414341	0.150237
CD1818	ispH	putative 4-hydroxy-3-methylbut-2-enyl diphosphate reductase	0.520797	1.08626	Down	-0.119375	0.120231
CD1819		putative membrane protein	0.317946	1.41211	Down	-0.497853	0.313124
CD1820	ade	adenine deaminase	0.70806	1.09992	Down	-0.137399	0.240177
CD1821	tlpB	putative transposase-like protein B	0.506831	1.26813	Up	0.342699	0.333466
CD1822	bcp	putative thiol peroxidase (bacterioferritin comigratory protein)	0.0454601	2.81075	Down	-1.49095	0.308127
CD1823		conserved hypothetical protein	0.0910414	3.94337	Down	-1.97943	0.556838
CD1824		putative cations-transporting ATPase	0.00984817	2.47067	Down	-1.3049	0.128217
CD1825	cysD	putative O-acetylhomoserine sulfhydrylase	0.185115	1.86097	Down	-0.896056	0.36526
CD1826	metA	homoserine O-succinyltransferase	0.125711	1.64335	Down	-0.716641	0.235513
CD1827		MarR-family transcriptional regulator	0.281103	1.3864	Up	0.471344	0.271554
CD1828	ftsH1	cell division protein	0.547109	1.06384	Up	0.0892786	0.096345
CD1829	kdpD	two-component sensor histidine kinase	0.797381	1.05284	Down	-0.0742888	0.182085
CD1830	kdpE	two-component response regulator	0.19367	1.2094	Down	-0.274294	0.114716
CD1831		putative cation transport-related, membrane protein	0.138702	1.87129	Down	-0.904033	0.313943
CD1831A		hypothetical protein	0.701814	1.11192	Down	-0.153048	0.261568
CD1832		putative chorismate biosynthesis-related protein [includes: phospho-2-dehydro-3-deoxyheptonate aldolase and chorismate mutase]	0.240849	1.73813	Up	0.797534	0.398841
CD1833	aroB	3-dehydroquinate synthase	0.321771	1.68594	Up	0.753551	0.477876
CD1834	aroA	3-phosphoshikimate 1-carboxyvinyltransferase	0.768431	1.14938	Up	0.200852	0.435561
CD1835	aroC	chorismate synthase (5-enolpyruvylshikimate-3-phosphate phospholyase)	0.576205	1.2059	Down	-0.270112	0.315273
CD1836	pheA	P-protein [includes: chorismate mutase and prephenate dehydratase]	0.309222	1.25418	Down	-0.326741	0.201201
CD1837	aroE	shikimate dehydrogenase	0.553978	1.26891	Down	-0.343591	0.377501
CD1838	aroK	shikimate kinase	0.803922	1.07897	Down	-0.109657	0.278193
CD1839	tyrC	putative prephenate dehydrogenase	0.92039	1.01713	Down	-0.0244994	0.146541
CD1840		putative signaling protein	0.0138602	2.43566	Down	-1.28431	0.160778
CD1841		putative signaling protein	0.120664	1.71656	Down	-0.779519	0.251192
CD1842		putative membrane protein	0.387954	1.51456	Down	-0.5989	0.443361
CD1843		conserved hypothetical protein	0.227458	1.21382	Up	0.279554	0.130364
CD1844		putative cell surface protein (pseudogene)	0.364996	1.05143	Down	-0.0723591	0.0507825
CD1844A		putative RNA methyltransferase (partial)	0.045201	1.84747	Down	-0.885551	0.182547
CD1845		putative membrane protein (partial)	0.71661	1.10724	Down	-0.146967	0.265186
CD1846		conserved hypothetical protein	0.225927	1.28659	Down	-0.363557	0.168475
CD1847		putative conjugative transposon protein	0.303211	1.17279	Up	0.22995	0.13986
CD1848		putative conjugative transposon protein	0.246445	1.20719	Up	0.271656	0.141091
CD1849		putative conjugal transfer protein	0.228366	1.34129	Up	0.423623	0.198216
CD1850		AraC-family transcriptional regulator	0.8153	1.09347	Down	-0.128918	0.345639
CD1851		putative conjugal transfer protein (putative single-stranded dna binding protein)	0.226415	1.17185	Up	0.228789	0.10624
CD1852		putative conjugative transposon membrane protein	0.606712	1.12995	Up	0.176258	0.223939
CD1853		putative conjugative transposon membrane protein	0.596014	1.20553	Up	0.269671	0.332559
CD1854		putative conjugative transposon membrane exported protein	0.227458	1.18202	Up	0.241251	0.112365
CD1855		putative conjugative transposon membrane protein	0.238672	1.49557	Up	0.580692	0.286842
CD1856		putative conjugal transfer protein	0.234863	1.21381	Up	0.279547	0.13392
CD1857		putative conjugative transposon cell wall hydrolase	0.238672	1.2091	Up	0.273934	0.133216
CD1857A		hypothetical protein	0.543437	1.13598	Up	0.183937	0.196139
CD1858			0.242714	1.20013	Up	0.263185	0.134065
CD1859		conjugative transposon DNA topoisomerase	0.24095	1.20829	Up	0.272964	0.136594
CD1859A		putative conjugative transposon regulatory protein	0.238672	1.60466	Up	0.682264	0.337216
CD1860		putative conjugative transposon conserved hypothetical protein	0.18739	1.50011	Up	0.585071	0.240208
CD1861		conjugative transposon O-methyltransferase	0.0906386	1.23947	Up	0.309721	0.0868977
CD1862		putative conjugative transposon DNA recombination protein	0.179827	1.18592	Up	0.246005	0.0983544
CD1863		putative conjugative transposon conserved hypothetical protein	0.238672	1.20285	Up	0.266457	0.129931
CD1864		putative conjugative transposon egulatory protein	0.579524	1.31109	Down	-0.390772	0.4602
CD1865		putative conjugative transposon DNA recombination protein	0.0622836	1.44726	Up	0.533324	0.12626
CD1866		putative conjugative transposon conserved hypothetical protein	0.111408	1.38474	Up	0.46961	0.145246
CD1867		conjugative transposon conserved hypothetical protein	0.485652	1.19145	Up	0.252718	0.2337
CD1868		conjugative transposon conserved hypothetical protein	0.680929	1.09212	Up	0.127134	0.201681
CD1869		putative conjugative transposon mobilization protein	0.355219	1.67271	Down	-0.742188	0.508927
CD1870		putative conjugative transposon mobilization protein	0.151004	1.49377	Down	-0.57896	0.210527
CD1871		conserved domain protein	0.0675361	1.68357	Up	0.751522	0.184644
CD1871A		conserved hypothetical protein	0.134288	1.68899	Up	0.756162	0.256691
CD1872		putative iron-sulfur-binding membrane protein	0.165732	1.55782	Up	0.639528	0.244895
CD1873	vexP1	ABC transporter, permease protein	0.350067	1.25232	Up	0.324602	0.22015
CD1874	vexP2	ABC transporter, ATP-binding protein	0.415375	1.27812	Up	0.354019	0.280147
CD1875	vexP3	ABC transporter, permease protein	0.309612	1.27824	Up	0.354157	0.218368
CD1876	vncR	two-component system, response regulator	0.30735	1.3653	Down	-0.449216	0.27556
CD1877	vncS	two-component system, sensor histidine kinase	0.507719	1.19576	Down	-0.257934	0.251718
CD1878		hypothetical protein	0.374645	1.2433	Down	-0.314179	0.22549
CD1878A		site-specific recombinase (pseudogene)	0.364996	1.05143	Down	-0.0723591	0.0507825
CD1878B		conserved hypothetical protein	0.520774	1.27912	Up	0.355147	0.357245
CD1880		hypothetical protein	0.779641	1.05341	Down	-0.0750608	0.170795
CD1882		site-specific recombinase	0.401036	1.49681	Down	-0.581894	0.442869
CD1883		AraC-family transcriptional regulator	0.789616	1.06846	Down	-0.0955299	0.22676
CD1884		hypothetical protein	0.238672	1.20137	Up	0.26468	0.130831
CD1885		putative acetyl xylan esterase	0.162441	1.3174	Up	0.39769	0.150706
CD1886		PadR-family transcriptional regulator	0.183484	1.2589	Up	0.33216	0.134664
CD1887		RNA polymerase sigma factor	0.238672	1.20614	Up	0.270397	0.134103
CD1888		putative membrane protein	0.116137	1.29066	Up	0.368114	0.116376
CD1889		ABC transporter, ATP-binding protein	0.349545	1.21174	Up	0.277075	0.187723
CD1890		putative membrane protein	0.789616	1.06296	Up	0.0880938	0.208802
CD1891		ABC transporter substrate-binding protein (pseudogene)	0.364996	1.05143	Down	-0.0723591	0.0507825
CD1892		conserved hypothetical protein	0.671055	1.15888	Up	0.212733	0.32684
CD1893		putative regulatory protein	0.0785498	1.76197	Up	0.81719	0.213486
CD1894		putative plasmid-related protein	0.616551	1.15572	Down	-0.208797	0.272802
CD1895		putative membrane protein	0.810936	1.16469	Up	0.21995	0.576627
CD1896		putative lipoprotein	0.768431	1.08427	Up	0.116722	0.25308
CD1897		hypothetical protein	0.0356609	1.33211	Down	-0.413715	0.0755451
CD1898		putative phage-related cell wall hydrolase (endolysin)	0.0752484	1.37164	Down	-0.455901	0.116843
CD1899		putative phage-related deoxycytidylate deaminase (putative late competence protein)	0.0483358	1.7797	Down	-0.831632	0.175718
CD1900		hypothetical protein	0.32818	1.71393	Up	0.777304	0.501226
CD1901		putative phage repressor	0.434902	1.3074	Up	0.386702	0.319409
CD1902		putative transposase (partial)	0.810936	1.1059	Down	-0.145222	0.380316
CD1903		putative lipoprotein signal peptidase	0.388815	1.36942	Up	0.453565	0.336566
CD1904		ABC transporter, permease protein	0.403846	1.11561	Up	0.157829	0.121067
CD1905		site-specific recombinases	0.232509	1.29561	Up	0.373637	0.177728
CD1906		hypothetical protein	0.246445	1.19331	Up	0.254974	0.132531
CD1907	pduQ	putative ethanolamine/propanediol utilization propanol dehydrogenase	0.792665	1.05289	Up	0.0743569	0.179206
CD1908	pduU	putative ethanolamine/propanediol utilization protein	0.56038	1.20282	Down	-0.266423	0.297994
CD1909	pduV	putative ethanolamine/propanediol utilization protein	0.716218	1.04149	Up	0.058644	0.105661
CD1910		two-component response regulator	0.826477	1.08321	Down	-0.115313	0.327806
CD1911		two-component sensor histidine kinase	0.334398	1.16145	Down	-0.215931	0.141538
CD1912	eutA	putative ethanolamine/propanediol utilisation protein	0.238672	1.21039	Up	0.275475	0.135928
CD1913	eutB	putative ethanolamine/propanediol ammonia-lyase heavy chain	0.242714	1.20972	Up	0.274677	0.139992
CD1914	eutC	putative ethanolamine/propanediol ammonia-lyase light chain	0.506112	1.19334	Up	0.255005	0.247384
CD1915	eutL	putative ethanolamine/propanediol utilization protein	0.330482	1.13654	Up	0.184645	0.120023
CD1916		putative ethanolamine/propanediol utilisation protein	0.627724	1.09054	Up	0.125049	0.169044
CD1917		putative ethanolamine/propanediol utilisation aldehyde-alcohol dehydrogenase	0.434797	1.14684	Up	0.197662	0.16317
CD1918	eutM	putative ethanolamine/propanediol utilization protein	0.825213	1.06951	Up	0.0969484	0.273417
CD1919	eutT	putative ethanolamine/propanediol utilization cobalamin adenosyltransferase	0.249425	1.19778	Up	0.260361	0.136756
CD1920		putative propanediol/ethanolamine utilization protein	0.430548	1.15051	Up	0.202269	0.165459
CD1921		putative ethanolamine utilization/propanediol conserved hypothetical protein	0.194071	1.23868	Up	0.308801	0.129345
CD1922	eutN	putative ethanolamine/propanediol utilization protein	0.168628	1.21119	Up	0.276422	0.106801
CD1923		putative ethanolamine/propanediol utilization protein	0.199718	1.24333	Up	0.314206	0.134434
CD1924	eutH	putative ethanolamine/propanediol transporter	0.370865	1.20416	Up	0.268026	0.191039
CD1925	eutQ	putative ethanolamine/propanediol utilization protein	0.793299	1.02243	Up	0.0320053	0.0773431
CD1926		AraC-family transcriptional regulator (partial)	0.224668	1.20366	Up	0.267433	0.123468
CD1927		ABC transporter, ATP-binding protein (pseudogene)	0.364996	1.05143	Down	-0.0723591	0.0507825
CD1928		putative membrane protein	0.239493	1.1768	Up	0.234871	0.116828
CD1929		putative membrane protein	0.245427	1.20953	Up	0.27445	0.142017
CD1930		putative exported protein	0.758819	1.04938	Up	0.0695426	0.145376
CD1931	dinR	SOS regulatory protein	0.273053	1.24366	Down	-0.314586	0.177672
CD1932		putative tyrosine recombinase	0.579767	1.19465	Up	0.256588	0.302713
CD1933		putative membrane protein	0.596044	1.12488	Down	-0.169768	0.209447
CD1934		conserved hypothetical protein	0.390231	1.16985	Down	-0.226319	0.16837
CD1935	spoVS	stage V sporulation protein S	0.32374	1.13272	Down	-0.179794	0.114632
CD1936	accA	acetyl-coenzyme A carboxylase carboxyl transferase subunit alpha	0.19367	1.46353	Down	-0.54945	0.22977
CD1937	accD	acetyl-coenzyme A carboxylase carboxyl transferase subunit beta	0.240849	1.68672	Down	-0.754222	0.377268
CD1938	accC	biotin carboxylase (acetyl-CoA carboxylase subunit A)	0.21743	2.09197	Down	-1.06486	0.481831
CD1939	accB	biotin carboxyl carrier protein of acetyl-CoA carboxylase	0.154341	2.29134	Down	-1.19619	0.44039
[truncated: 1,770 more rows]
